# Supplementary material
Source: PubMed Central journal article supplement (PMC10753860)

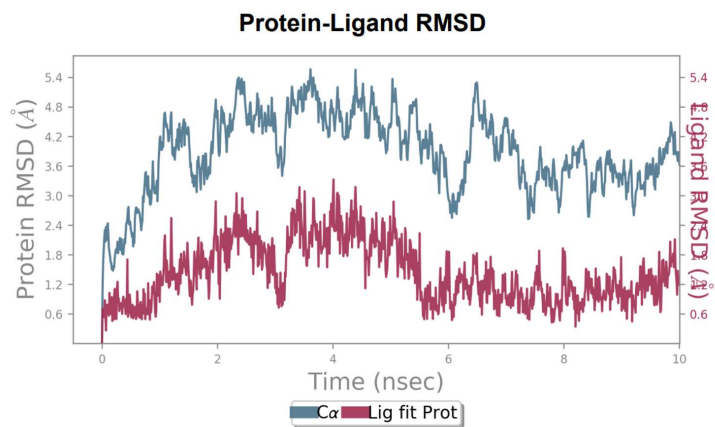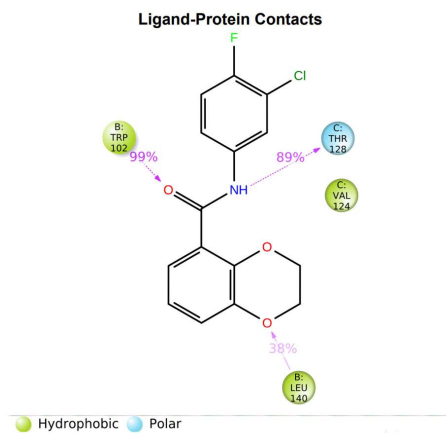

Figure S1: Plots of the root mean square deviation (RMSD) and ligand-protein contacts for 88 in the HAP pocket during the 10 ns simulation time.

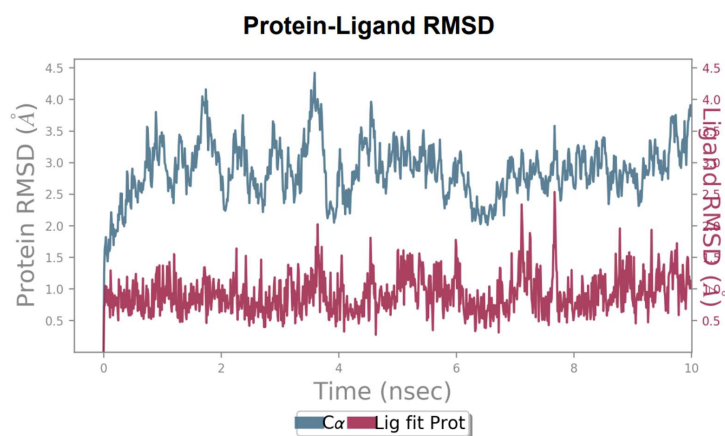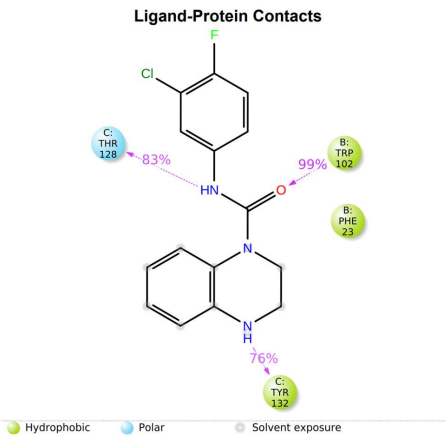

Figure S2: Plots of the root mean square deviation (RMSD) and ligand-protein contacts of 17 in the HAP pocket during the 10 ns simulation time.

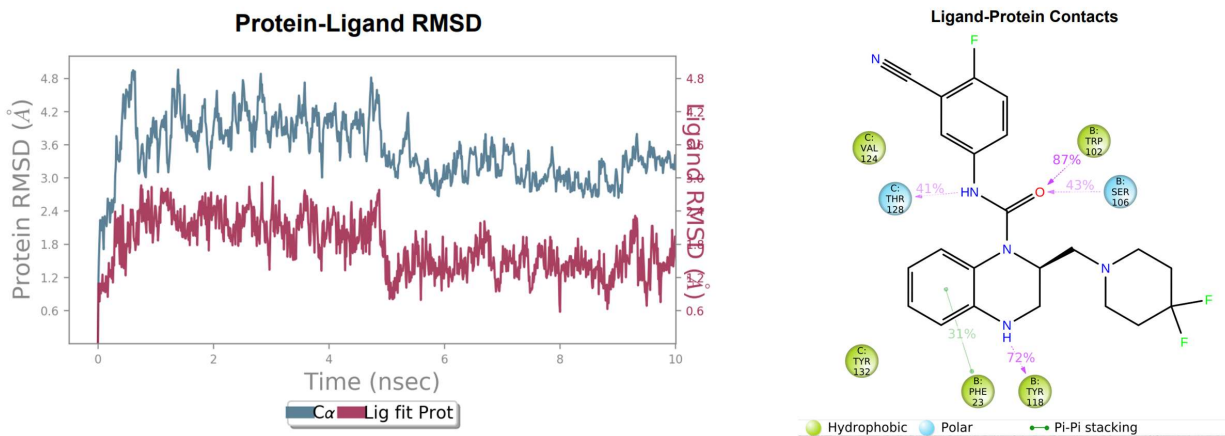

Figure S3: Plots of the root mean square deviation (RMSD) and ligand-protein contacts of 86 in the HAP pocket during the 10 ns simulation time.

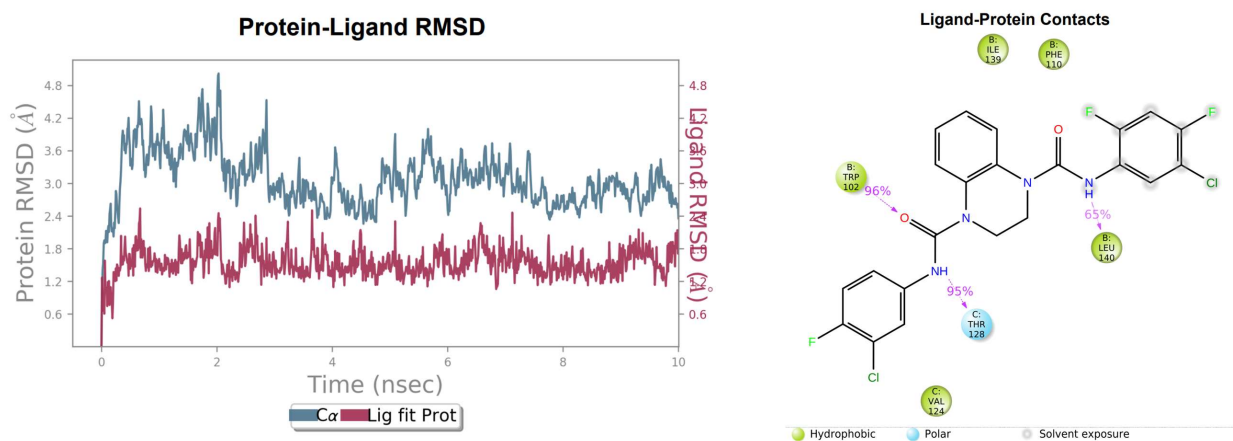

Figure S4: Plots of the root mean square deviation (RMSD) and ligand-protein contacts of 96 in the HAP pocket during the 10 ns simulation time.

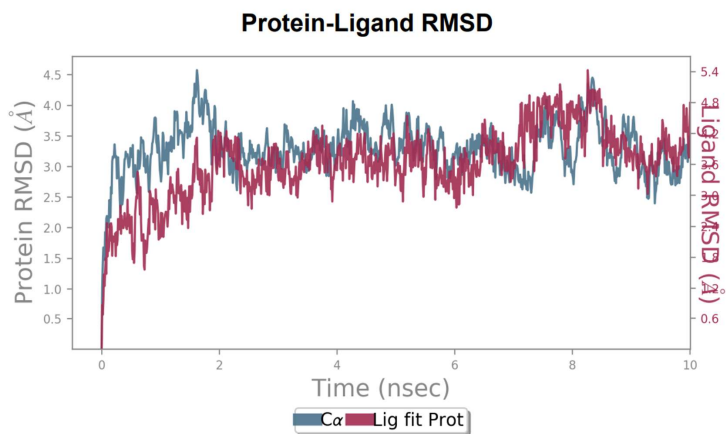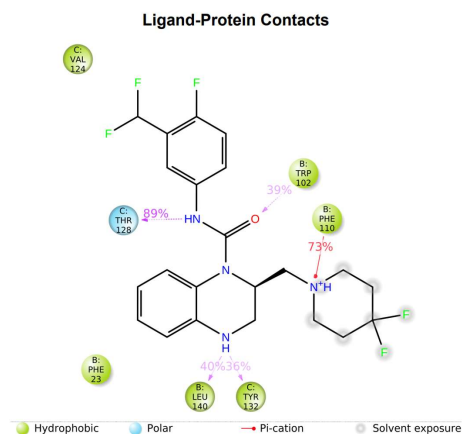

Figure S5: Plots of the root mean square deviation (RMSD) and ligand-protein contacts of 88 in the HAP pocket during the 10 ns simulation time.

<sup>1</sup>H NMR Spectrum (300 MHz, CDCl<sub>3</sub>) of 17

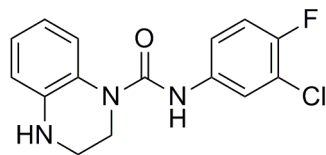

17

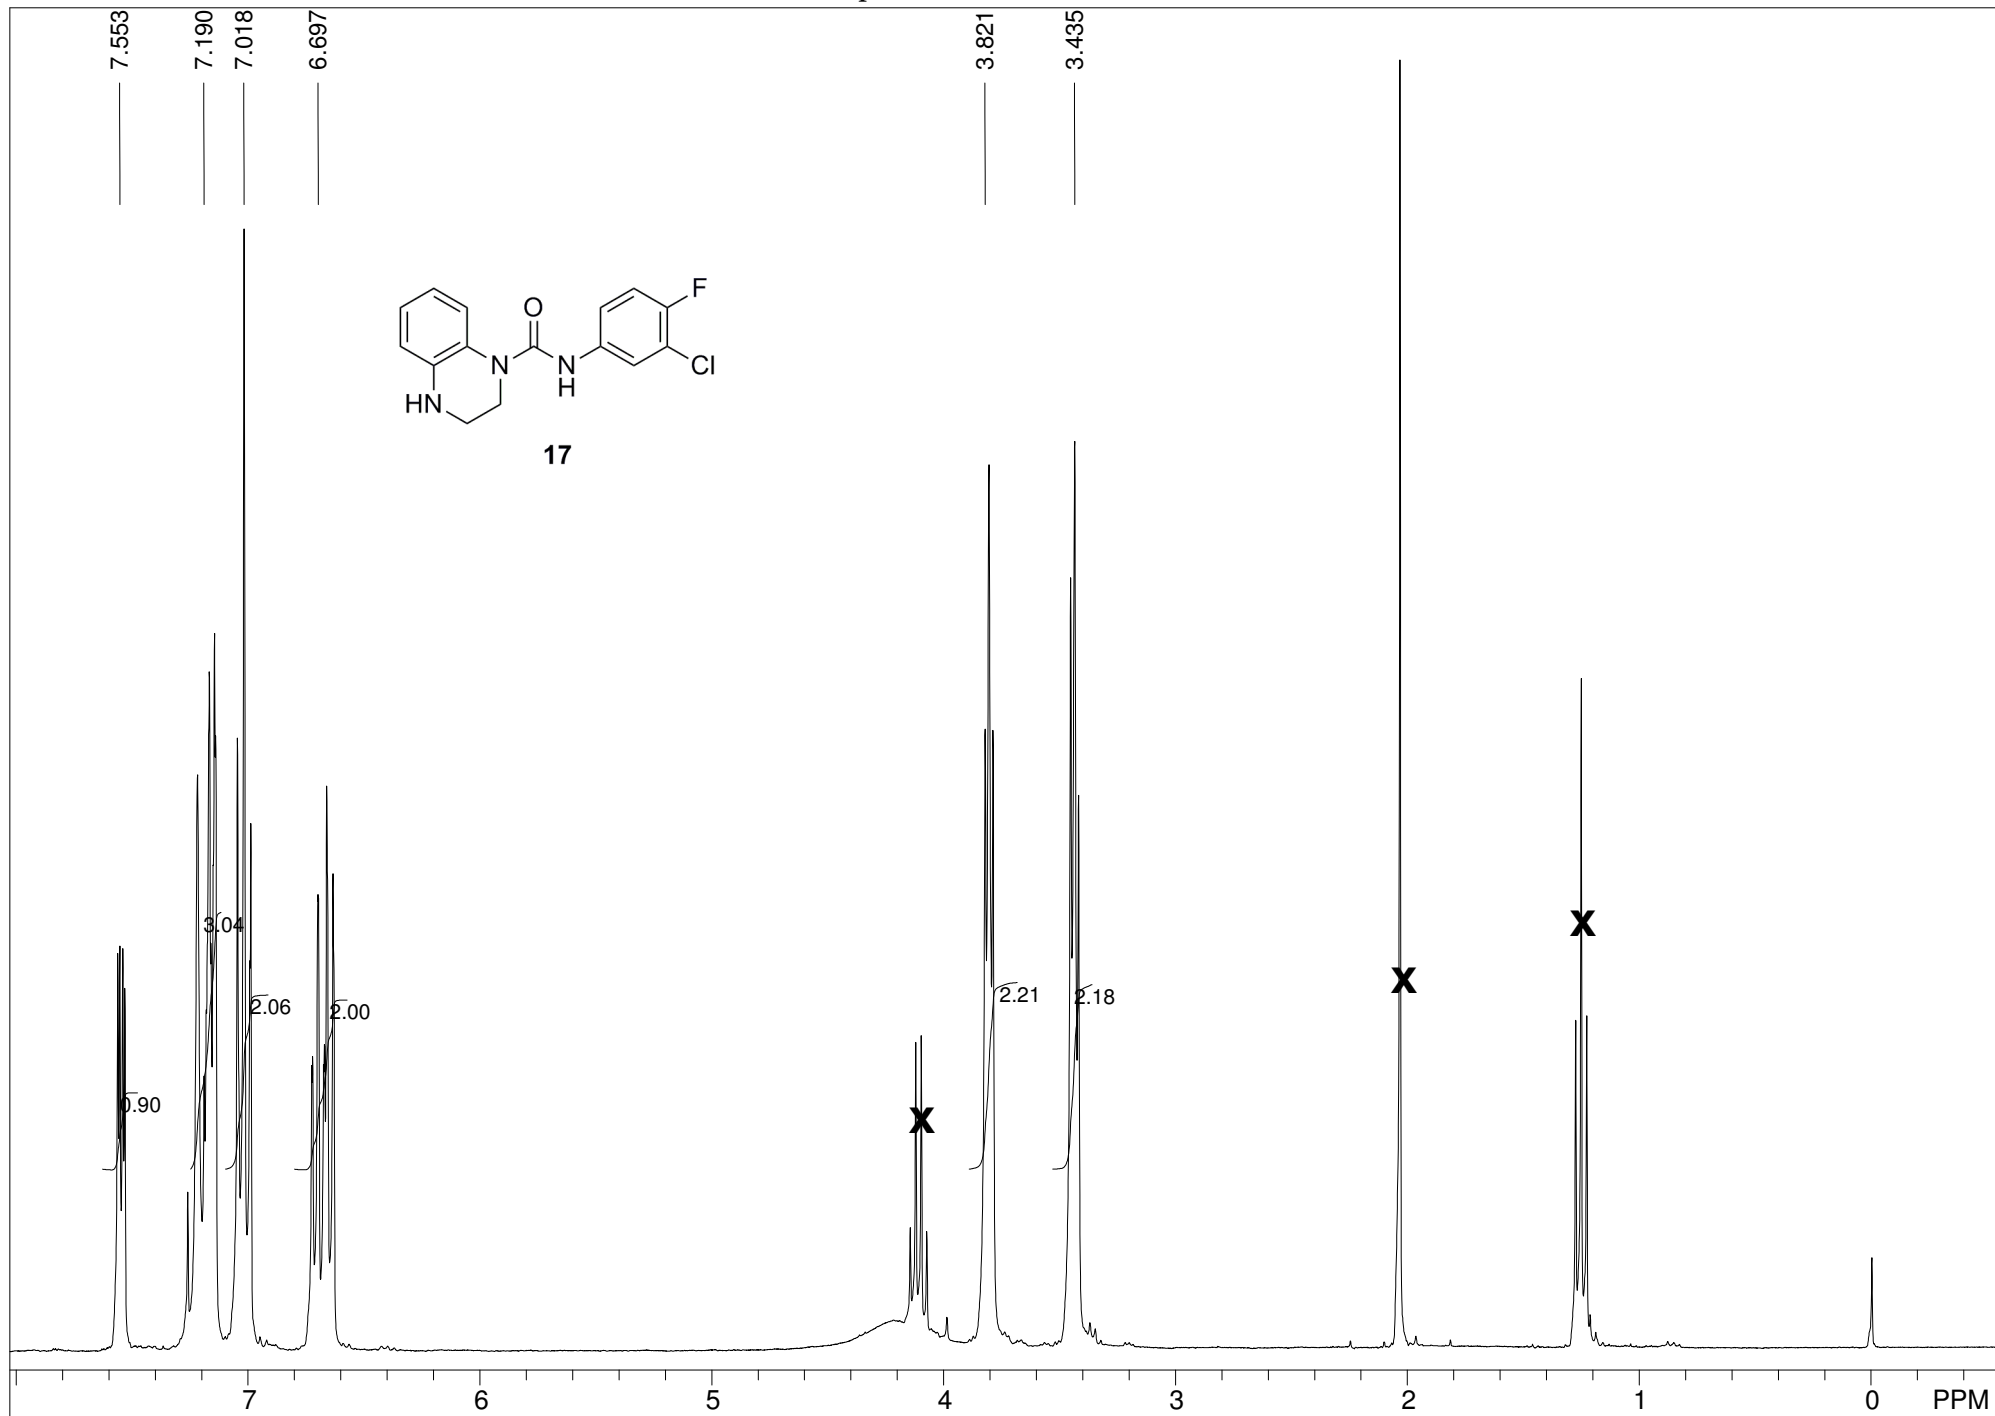

nh-43-98 20Nov2015

USER: -- DATE: Nov 20 2015 73:4

|             |                   |             |             |             |                              |
|-------------|-------------------|-------------|-------------|-------------|------------------------------|
| F1: 299.974 | F2: 75.436        | SW1: 4803   | OF1: 1799.8 | PTS1d: 9574 | 16384                        |
| EX: s2pul   | PW: 6.6 us, 45deg | PD: 1.0 sec | NA: 16      | LB: 0.3     | Nuts - \$nh-43-98 PROTON.fid |

## LCMS analysis of 17

Current Chromatogram(s)

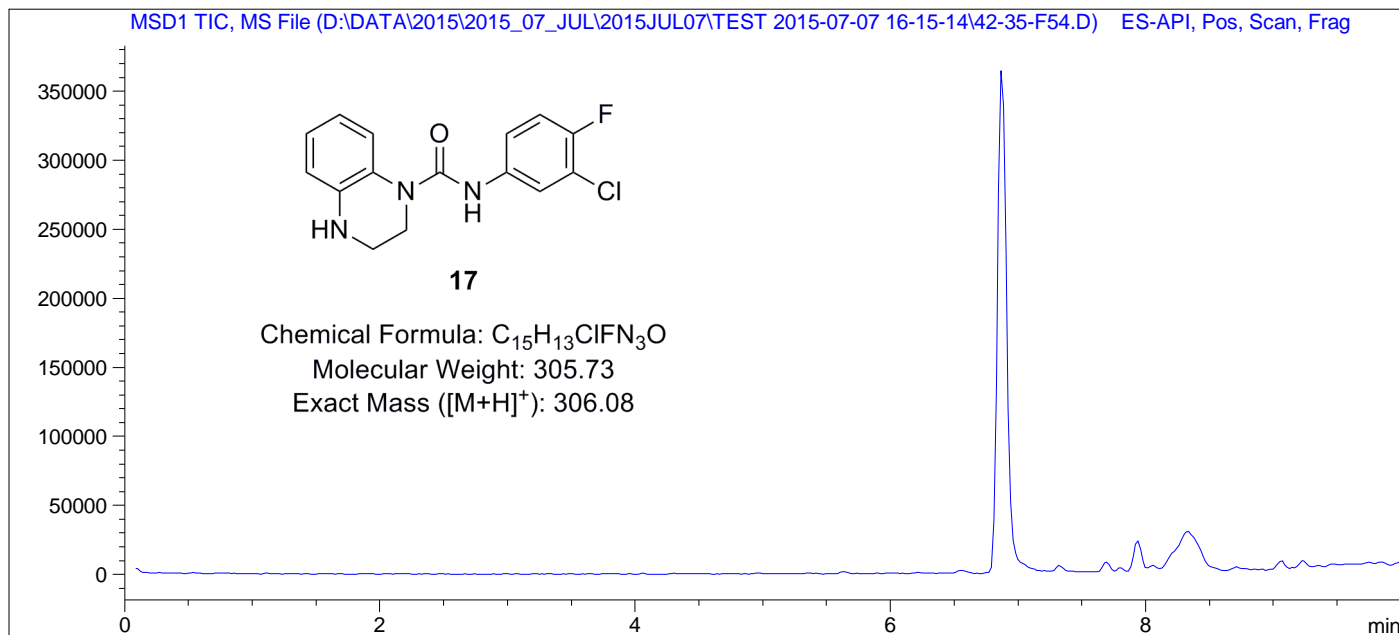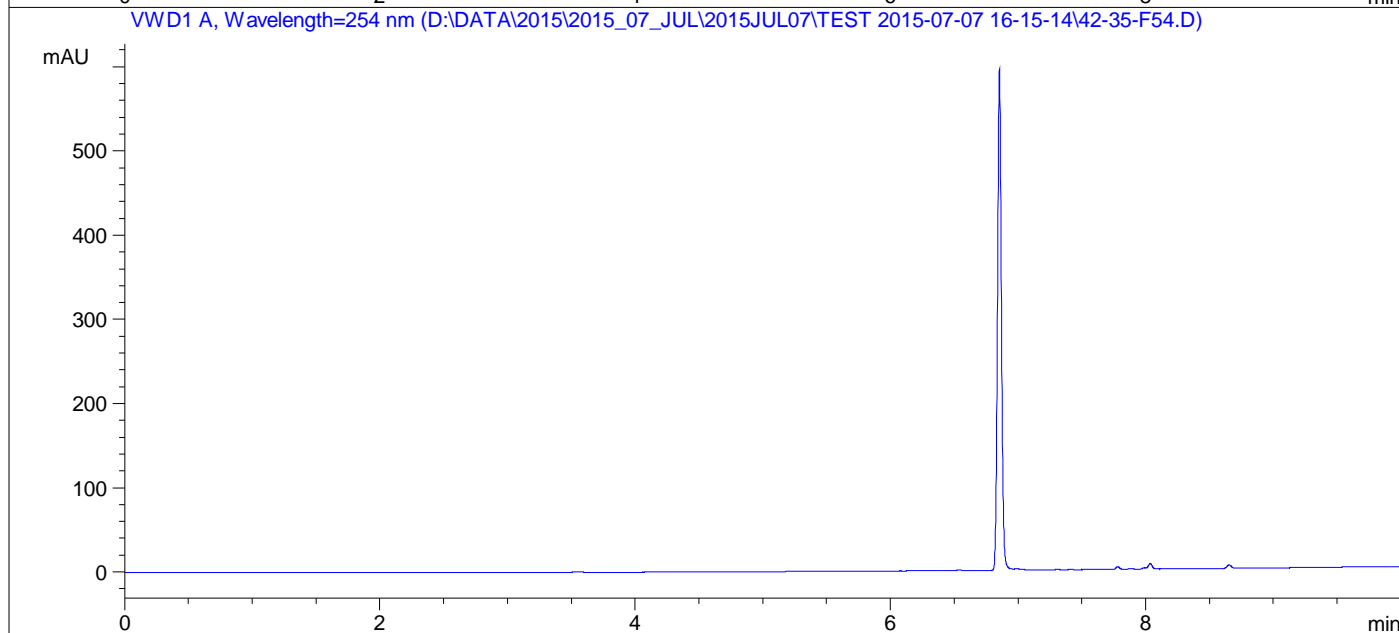

MS Spectrum

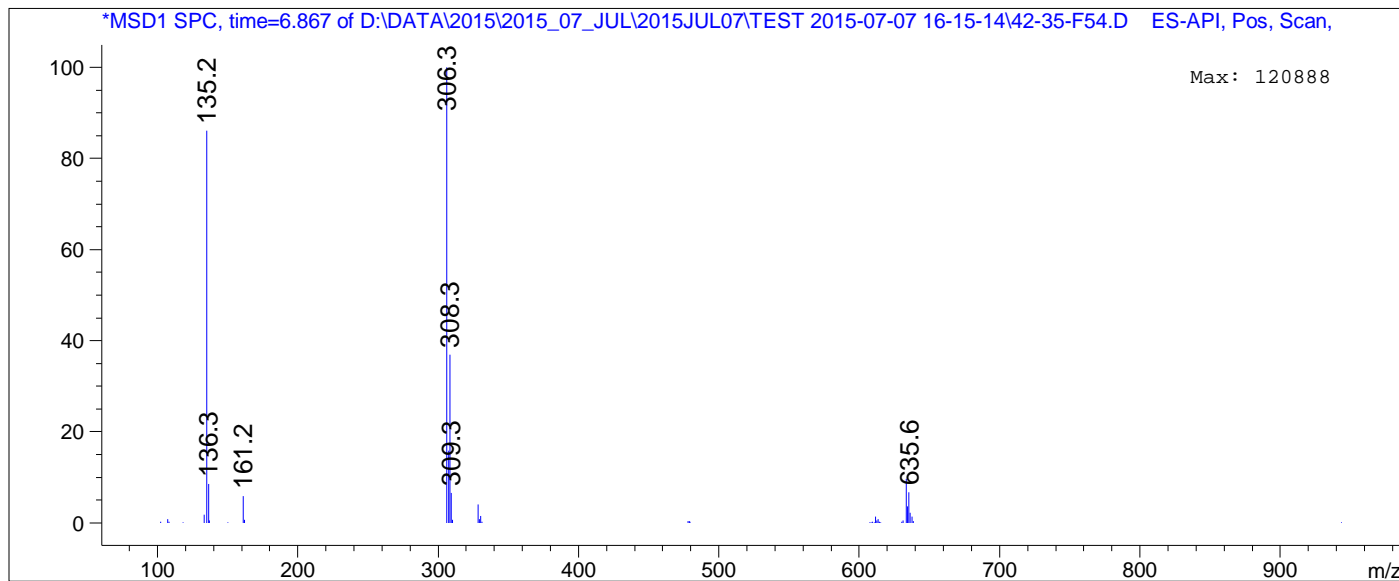

<sup>1</sup>H NMR Spectrum (300 MHz, CDCl<sub>3</sub>) of **18**

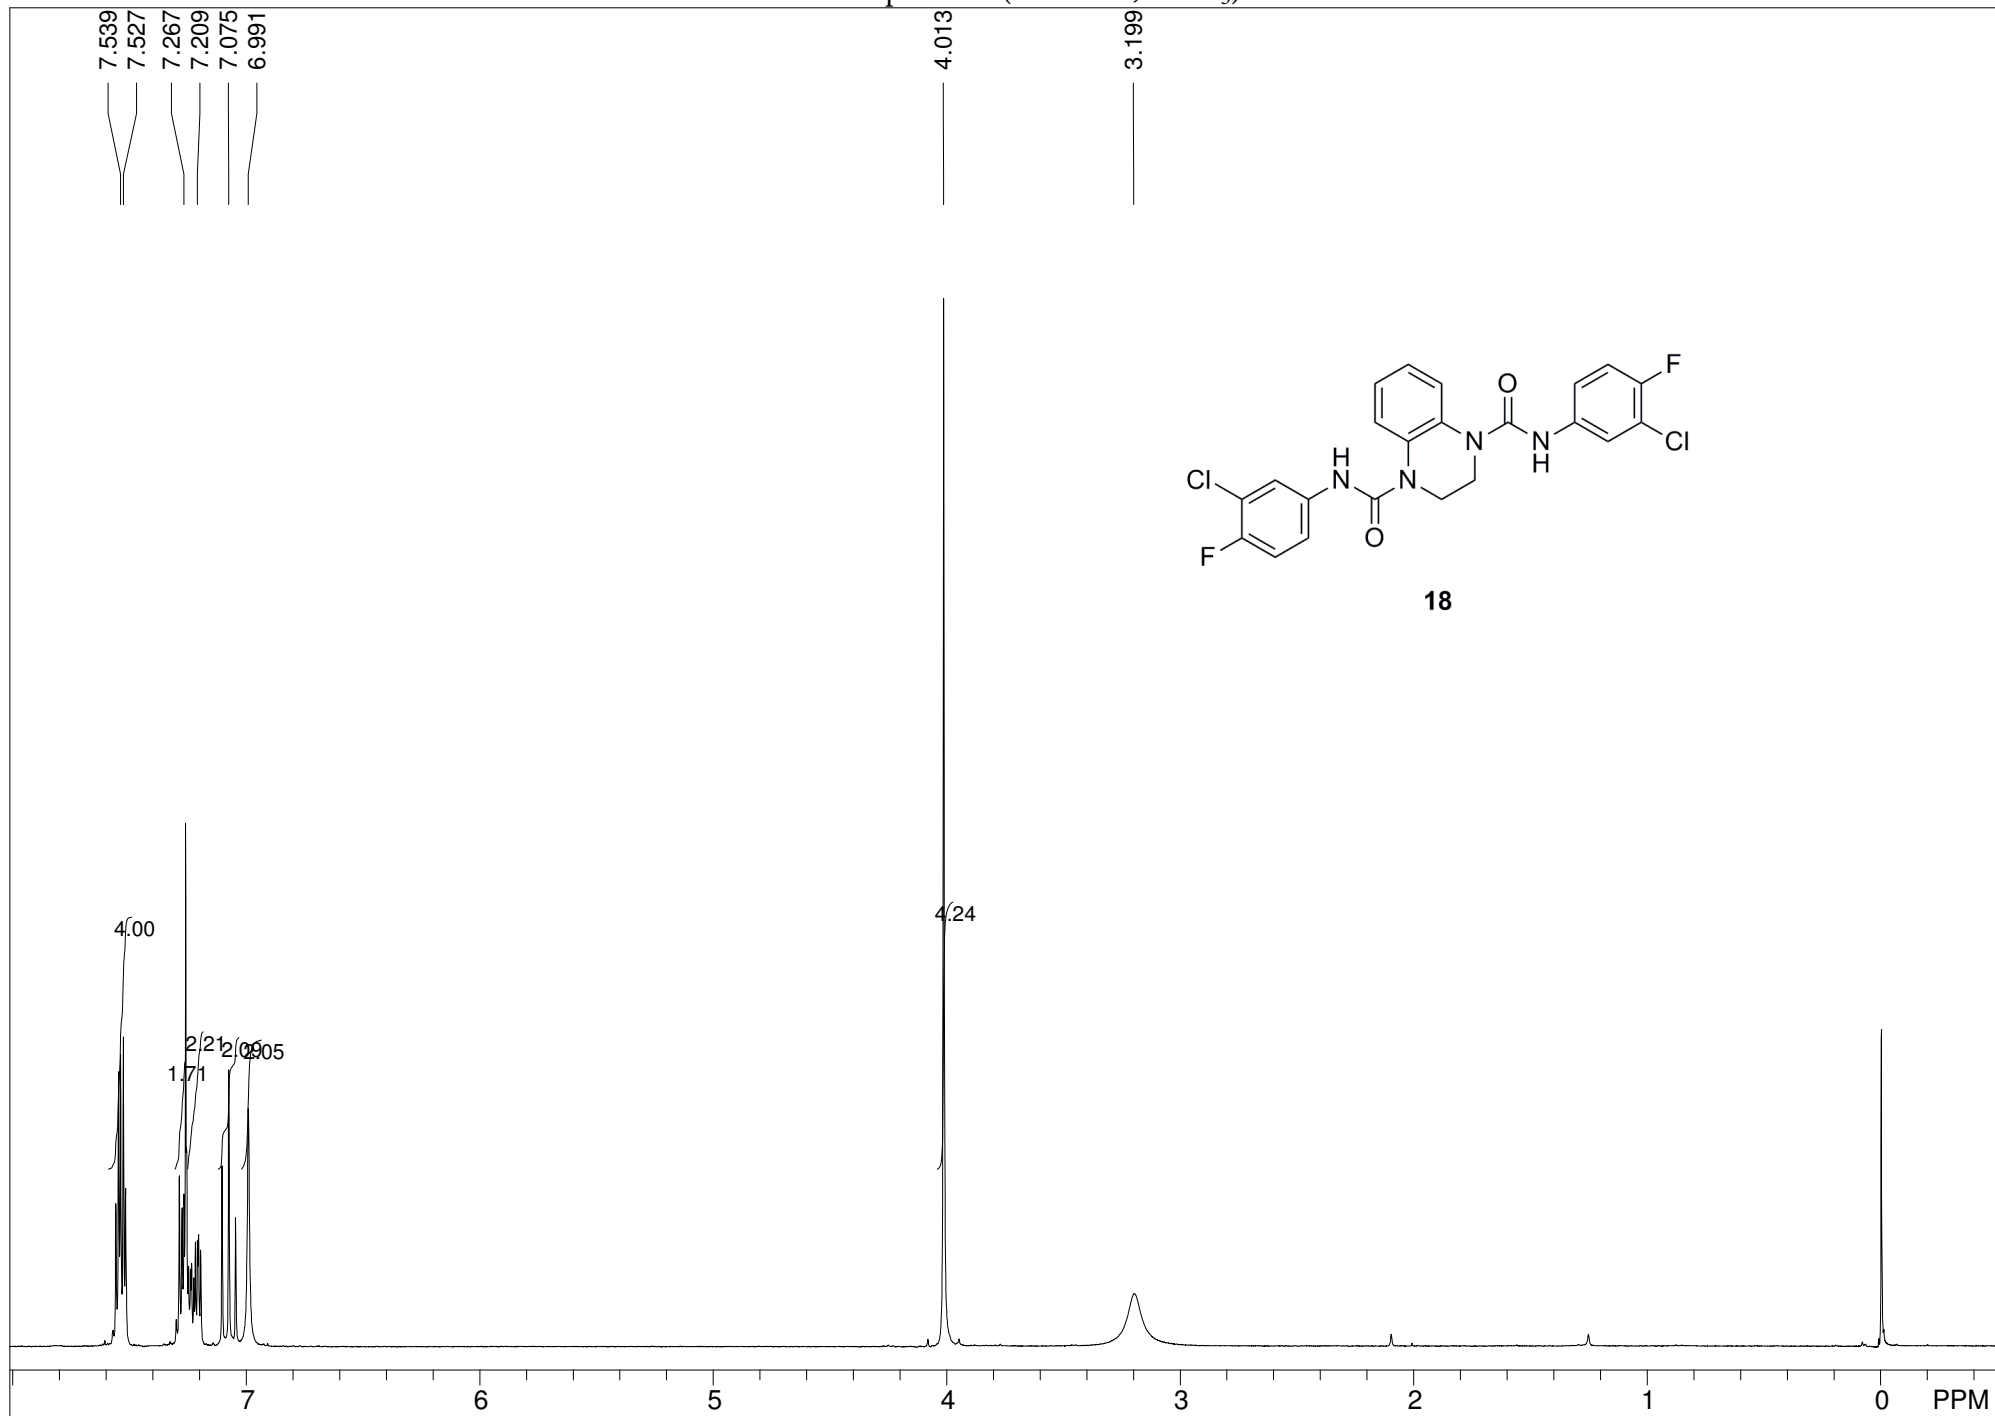

JL-42-16-DI 08Jul2015

USER: -- DATE: Jul 8 2015 "

|             |                   |             |        |             |                            |                     |
|-------------|-------------------|-------------|--------|-------------|----------------------------|---------------------|
| F1: 299.974 | F2: 75.436        | SW1: 4803   |        | OF1: 1802.4 |                            | PTS1d: 9574 , 16384 |
| EX: s2pul   | PW: 6.6 us, 45deg | PD: 1.0 sec | NA: 32 | LB: 0.3     | Nuts - \$JL-42-16-D PROTON |                     |

### LCMS analysis of 18

Current Chromatogram(s)

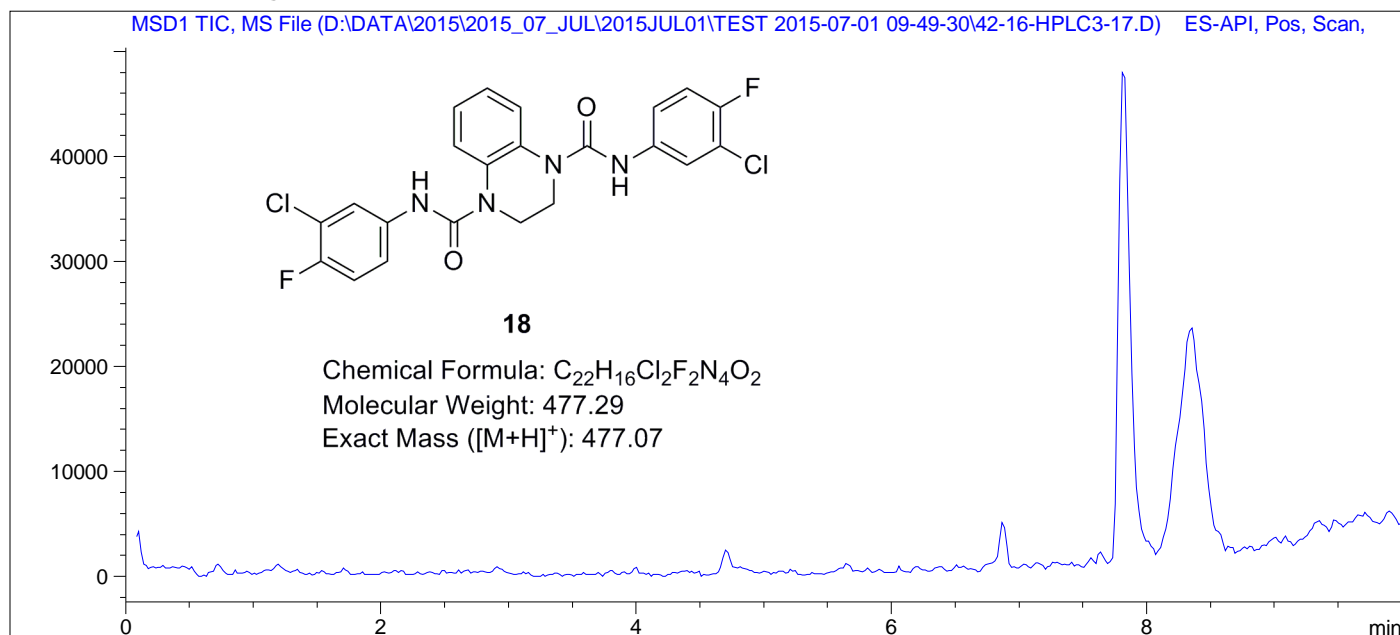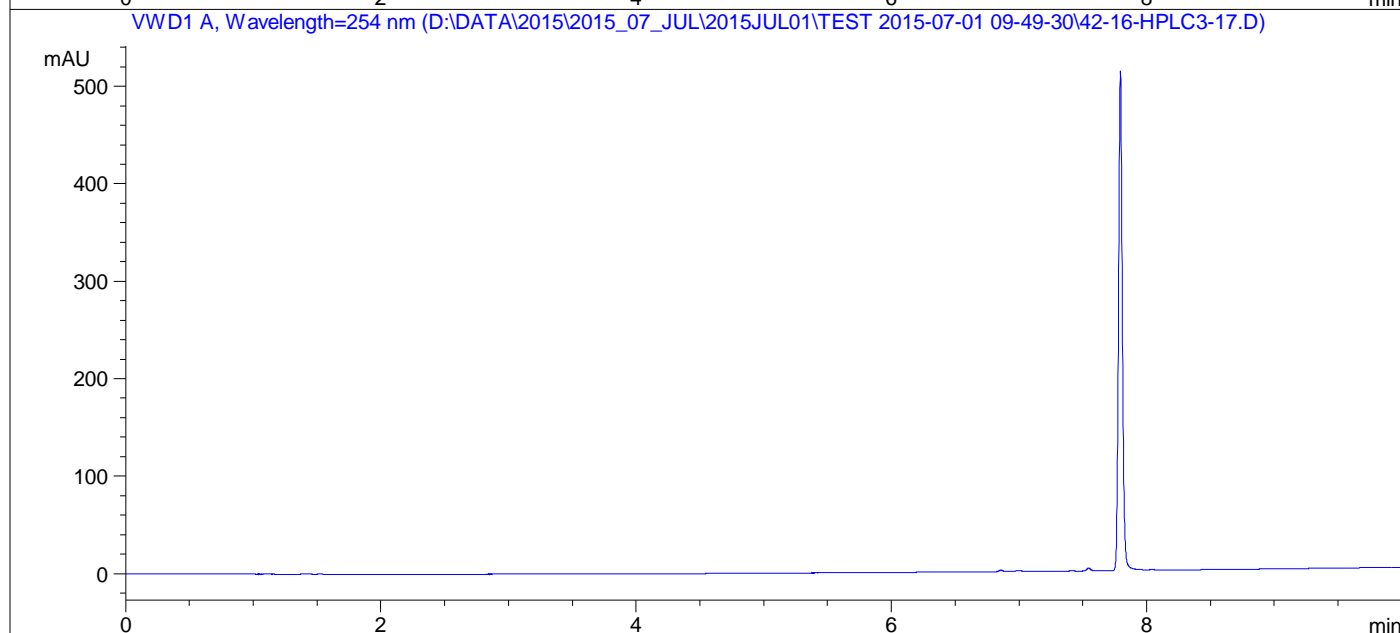

MS Spectrum

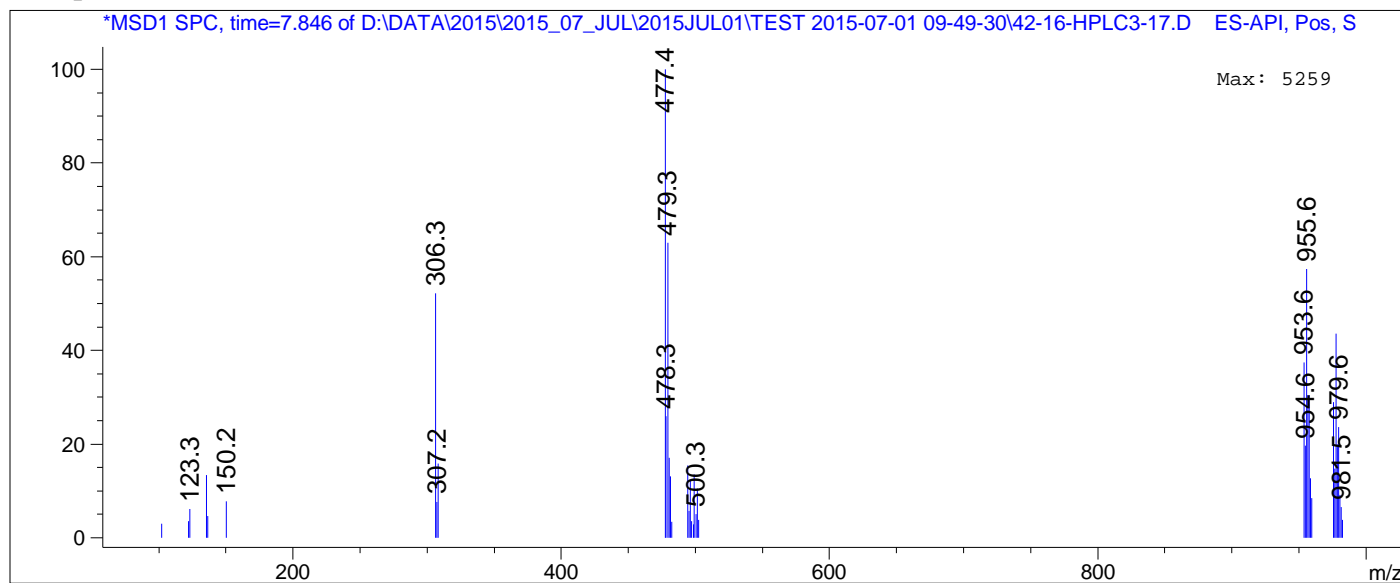

<sup>1</sup>H NMR Spectrum (300 MHz, CDCl<sub>3</sub>) of 35

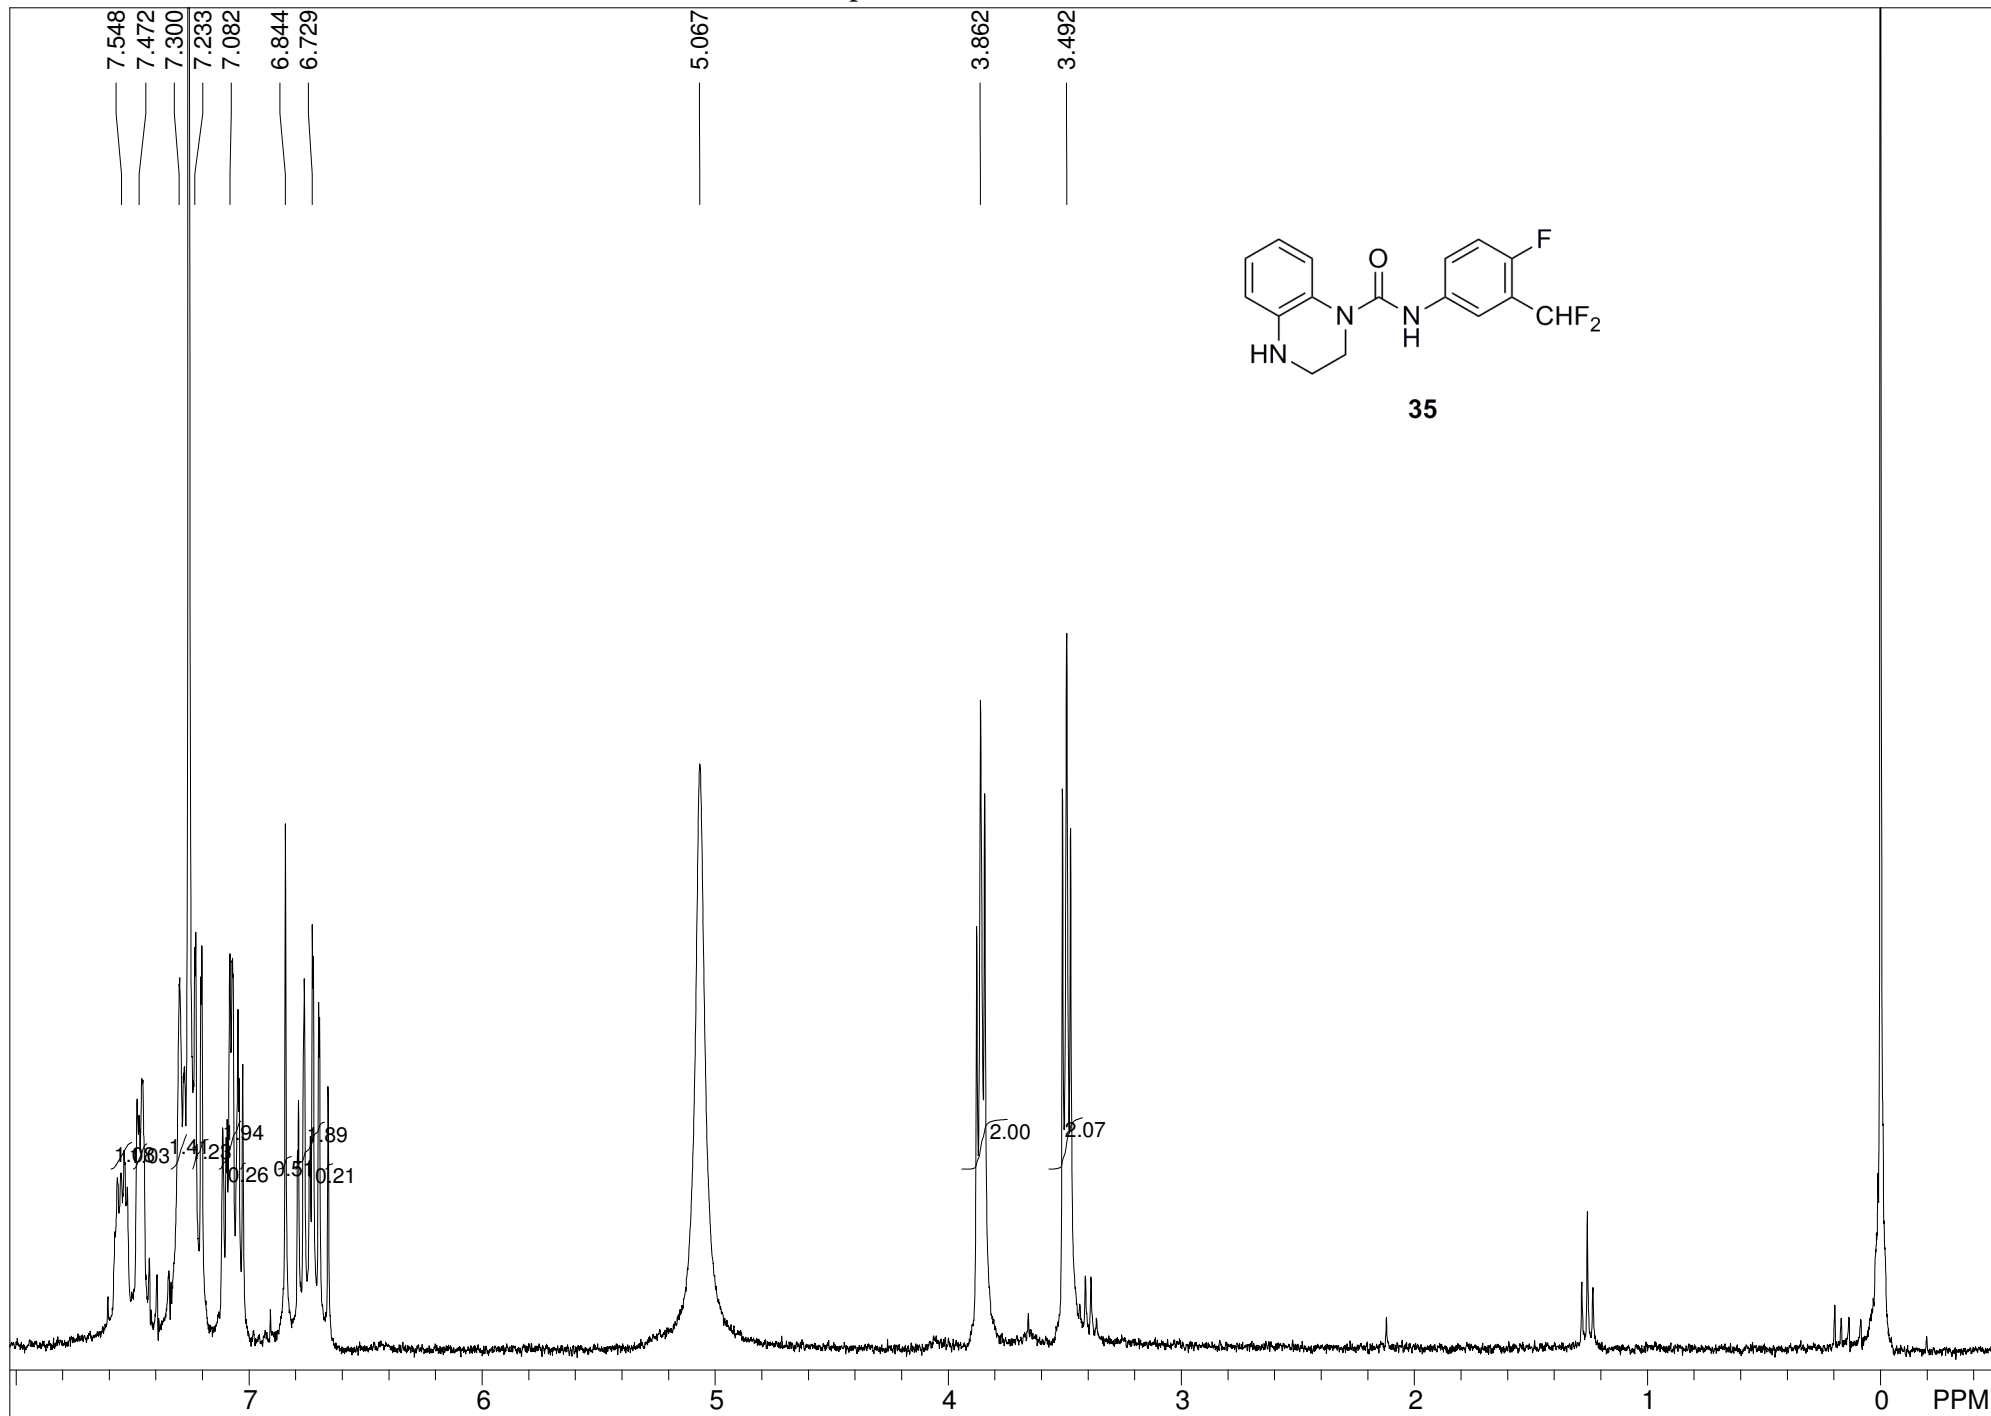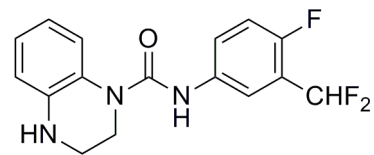

35



## LCMS analysis of 35

Current Chromatogram(s)

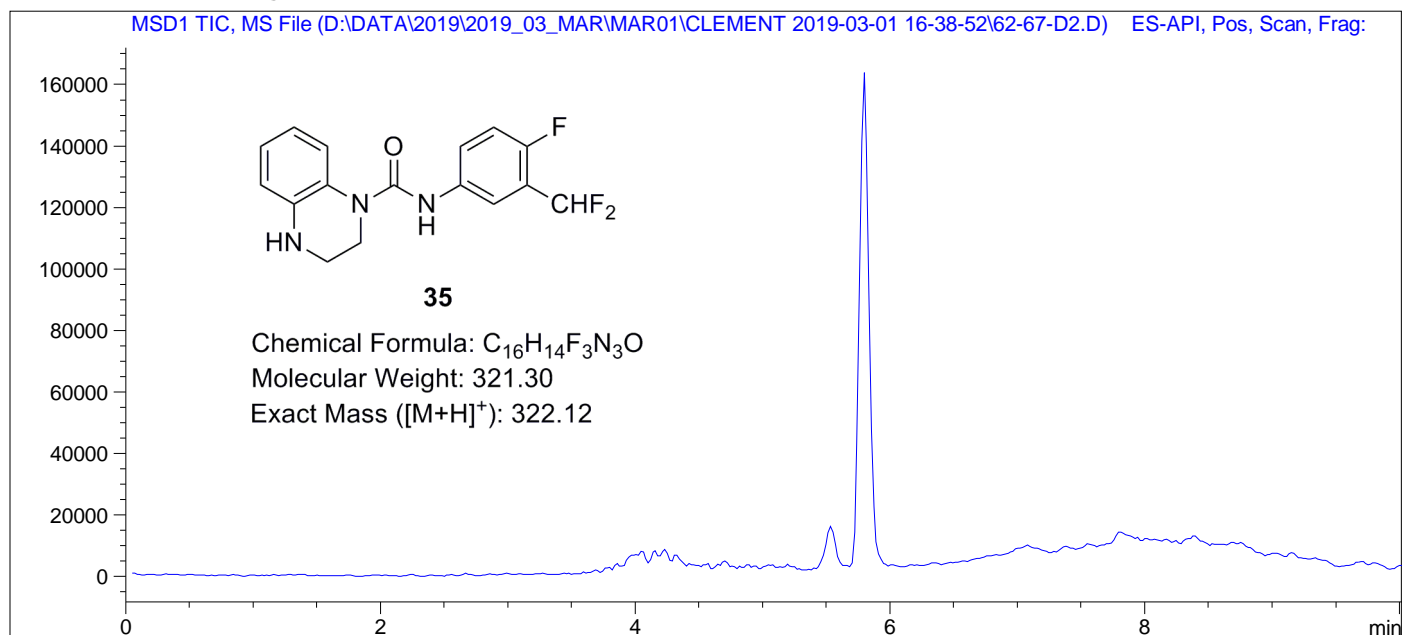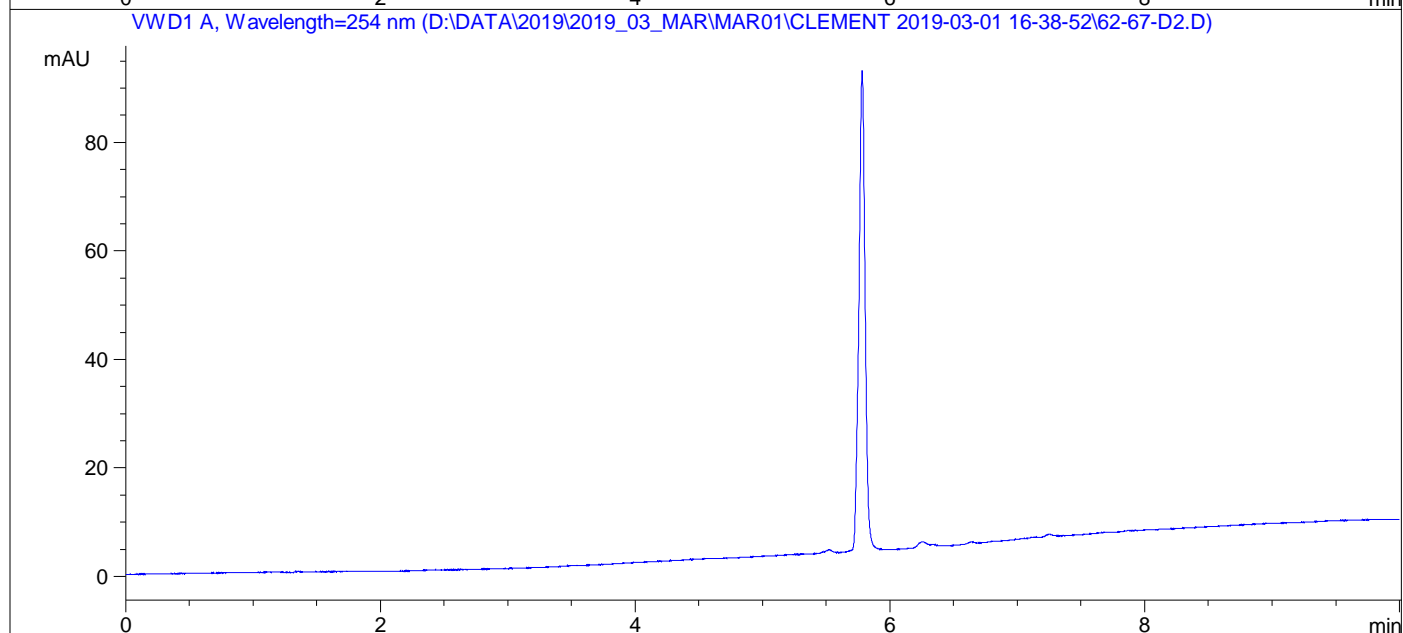

MS Spectrum

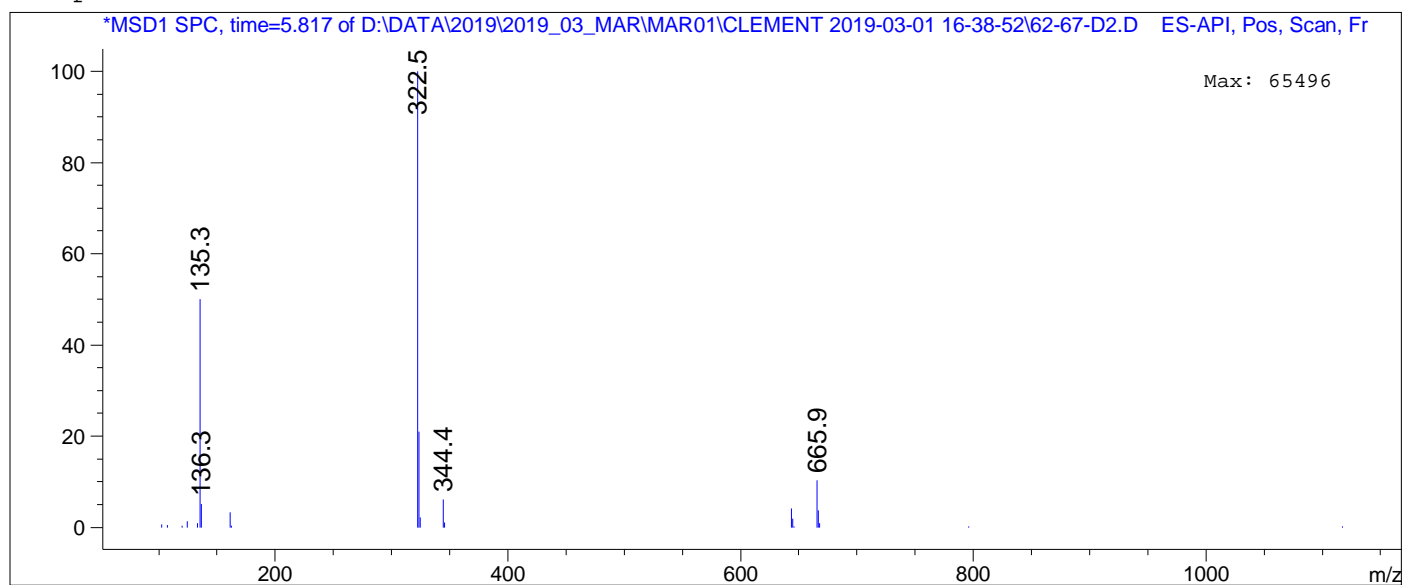

<sup>1</sup>H NMR Spectrum (600 MHz, CDCl<sub>3</sub>) of **48**

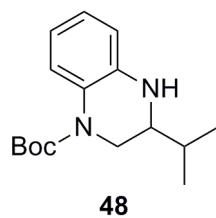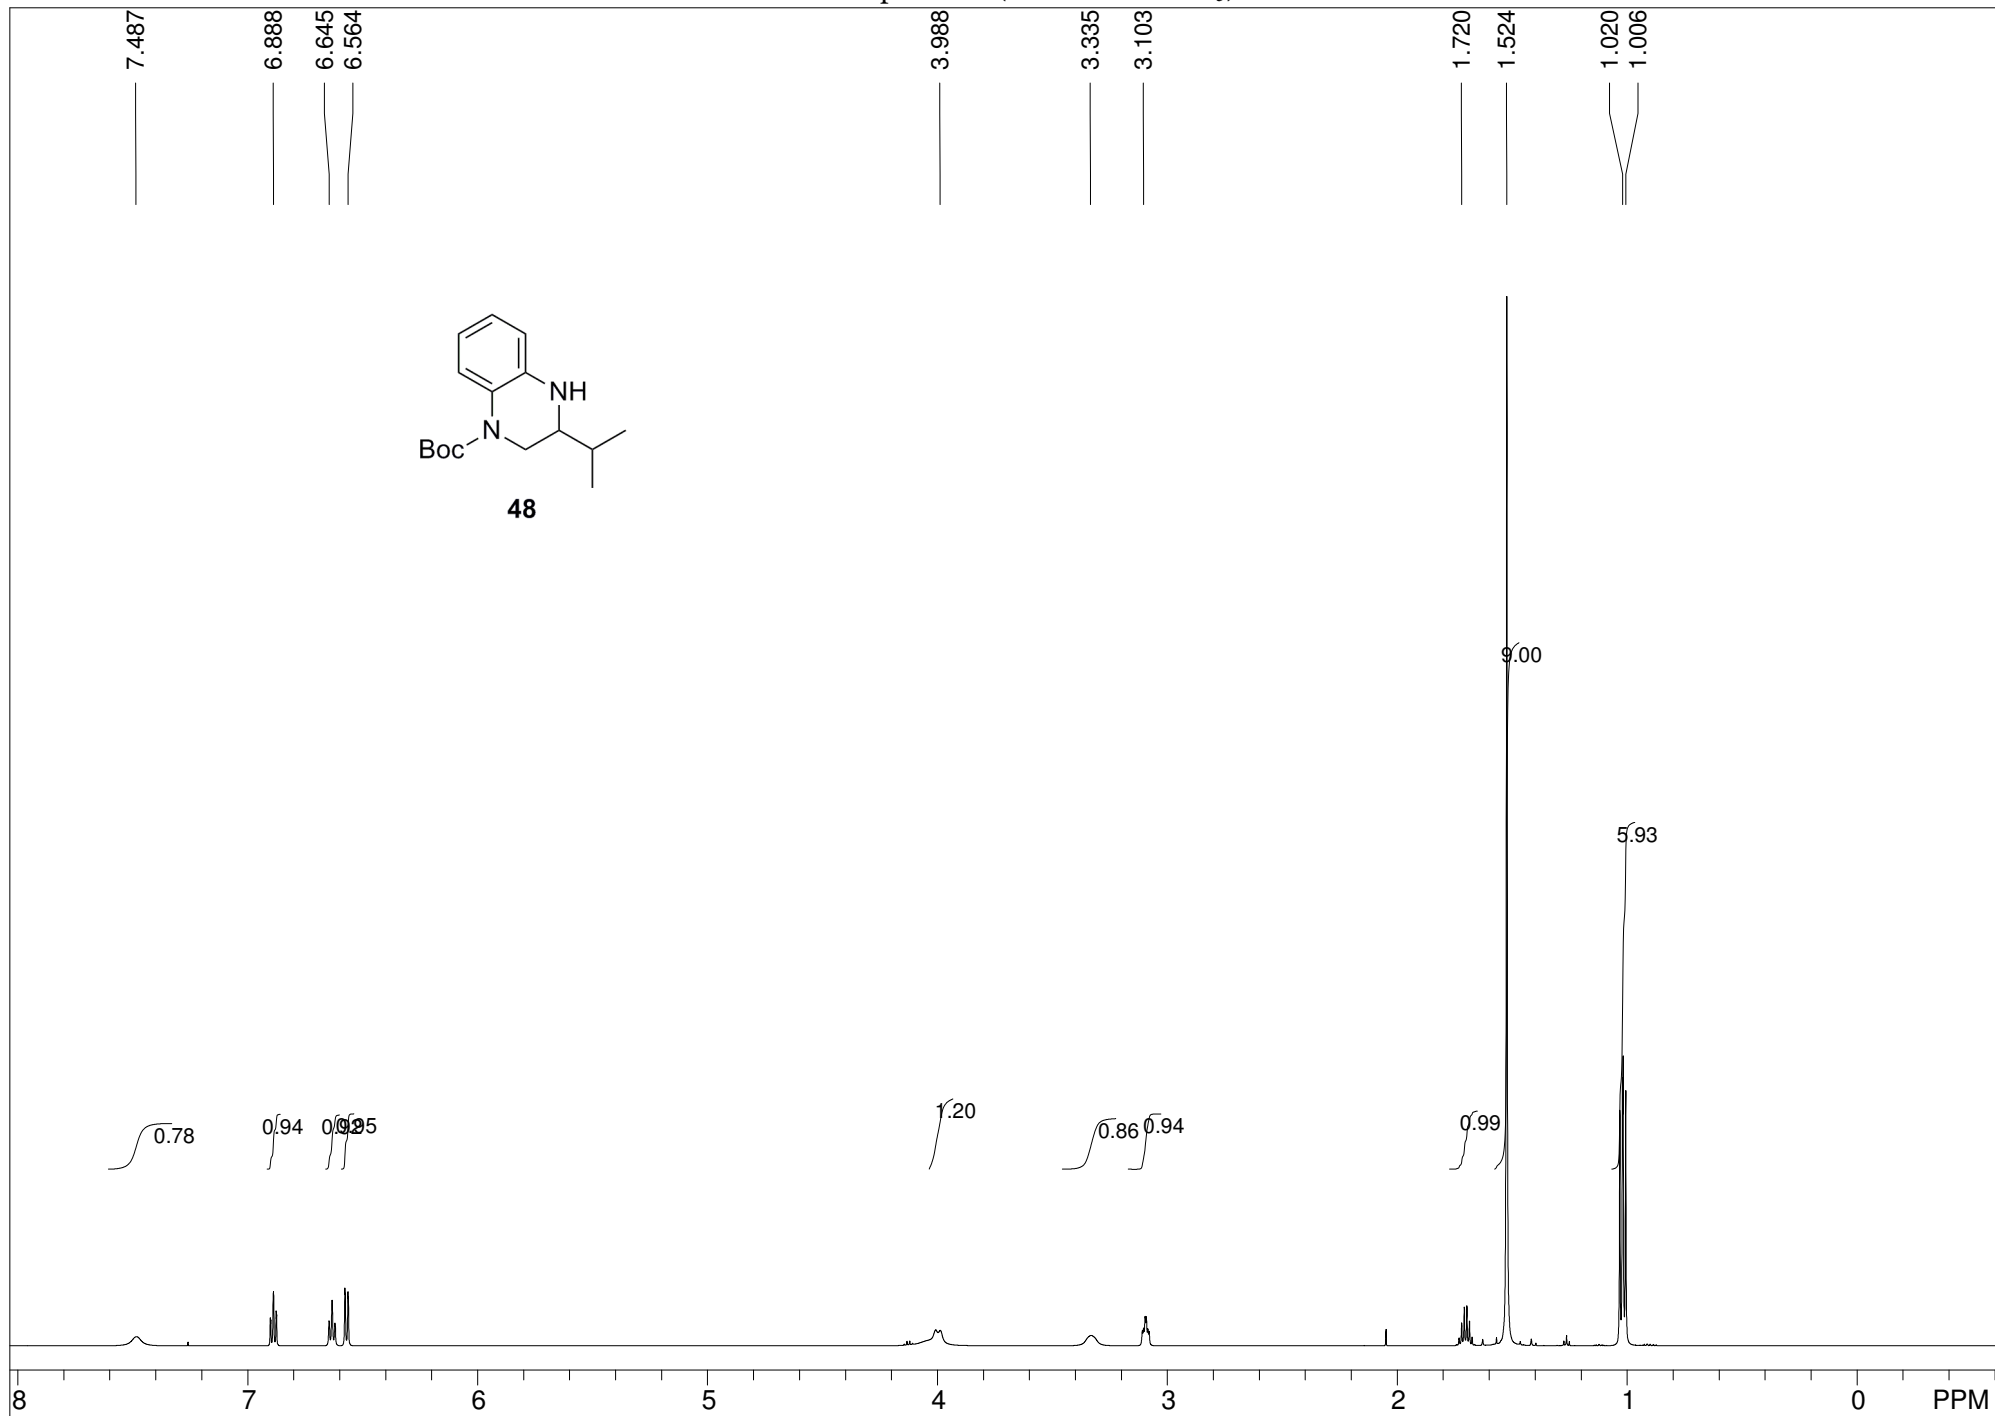

Sample ID 65-074

USER: undefined -- DATE: Thu Jan 20 16:05:47 2022

|             |            |            |             |                      |
|-------------|------------|------------|-------------|----------------------|
| F1: 600.134 | F2: 1.000  | SW1: 12019 | OF1: 3691.7 | PTS1d: 32768 , 65536 |
| EX:         | PW: ? usec | PD: ? sec  | NA: -1      | LB: 0.0              |

Nuts - \$65-074inCDCl3 1H.dx

## LCMS analysis of 48

Current Chromatogram(s)

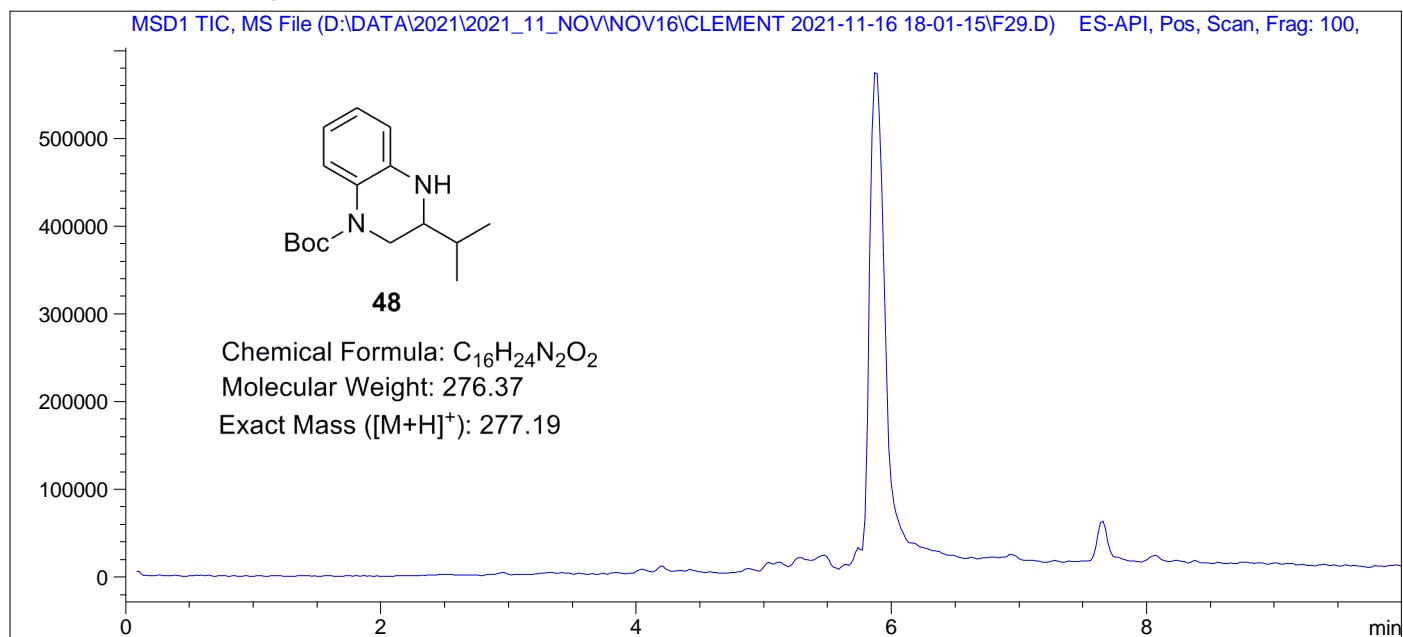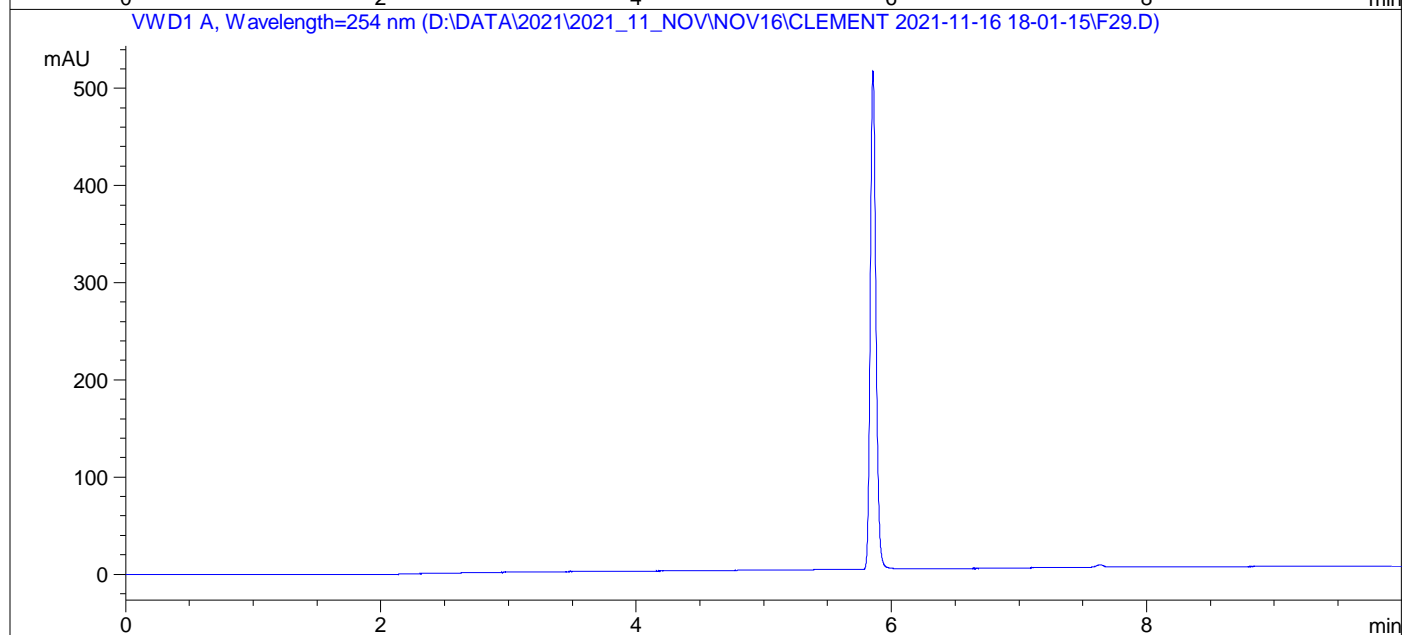

MS Spectrum

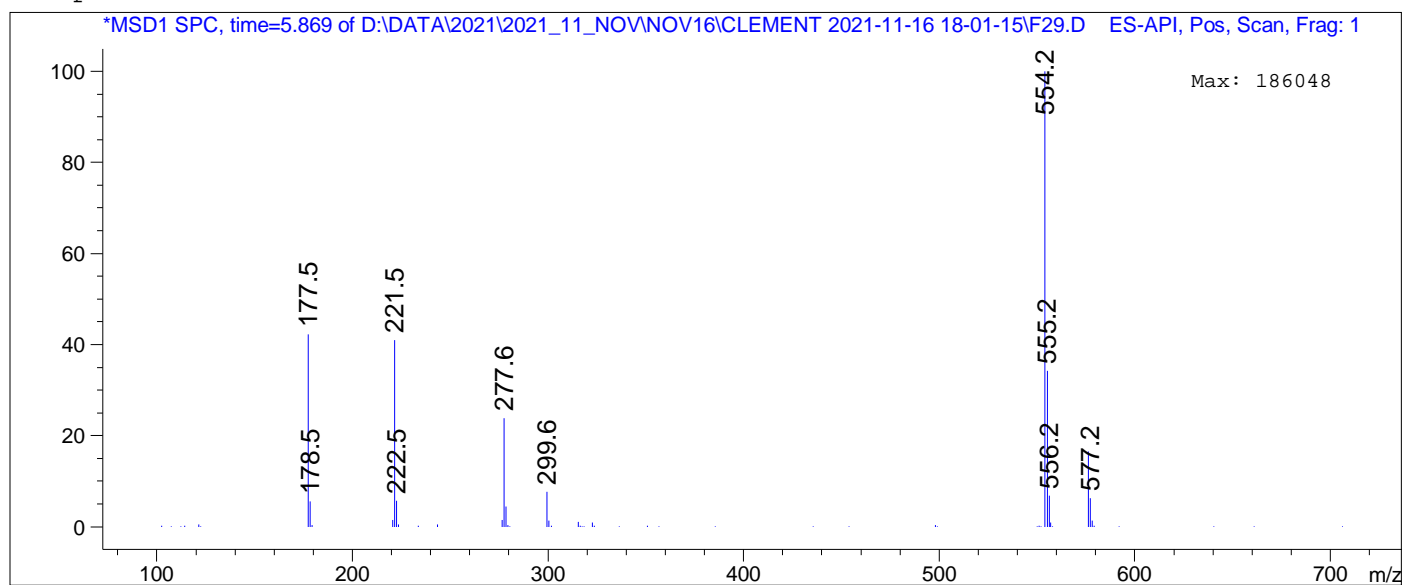

<sup>1</sup>H NMR Spectrum (600 MHz, CDCl<sub>3</sub>) of 48

"Results sample ID 65-074" 1 1 C:\Users\Jason\Documents\BSBIstuff\MedChem

Sample ID 65-074  
1H  
Jason Clement  
CDCl<sub>3</sub>  
25C

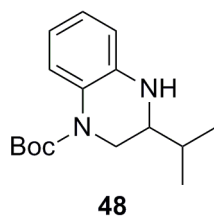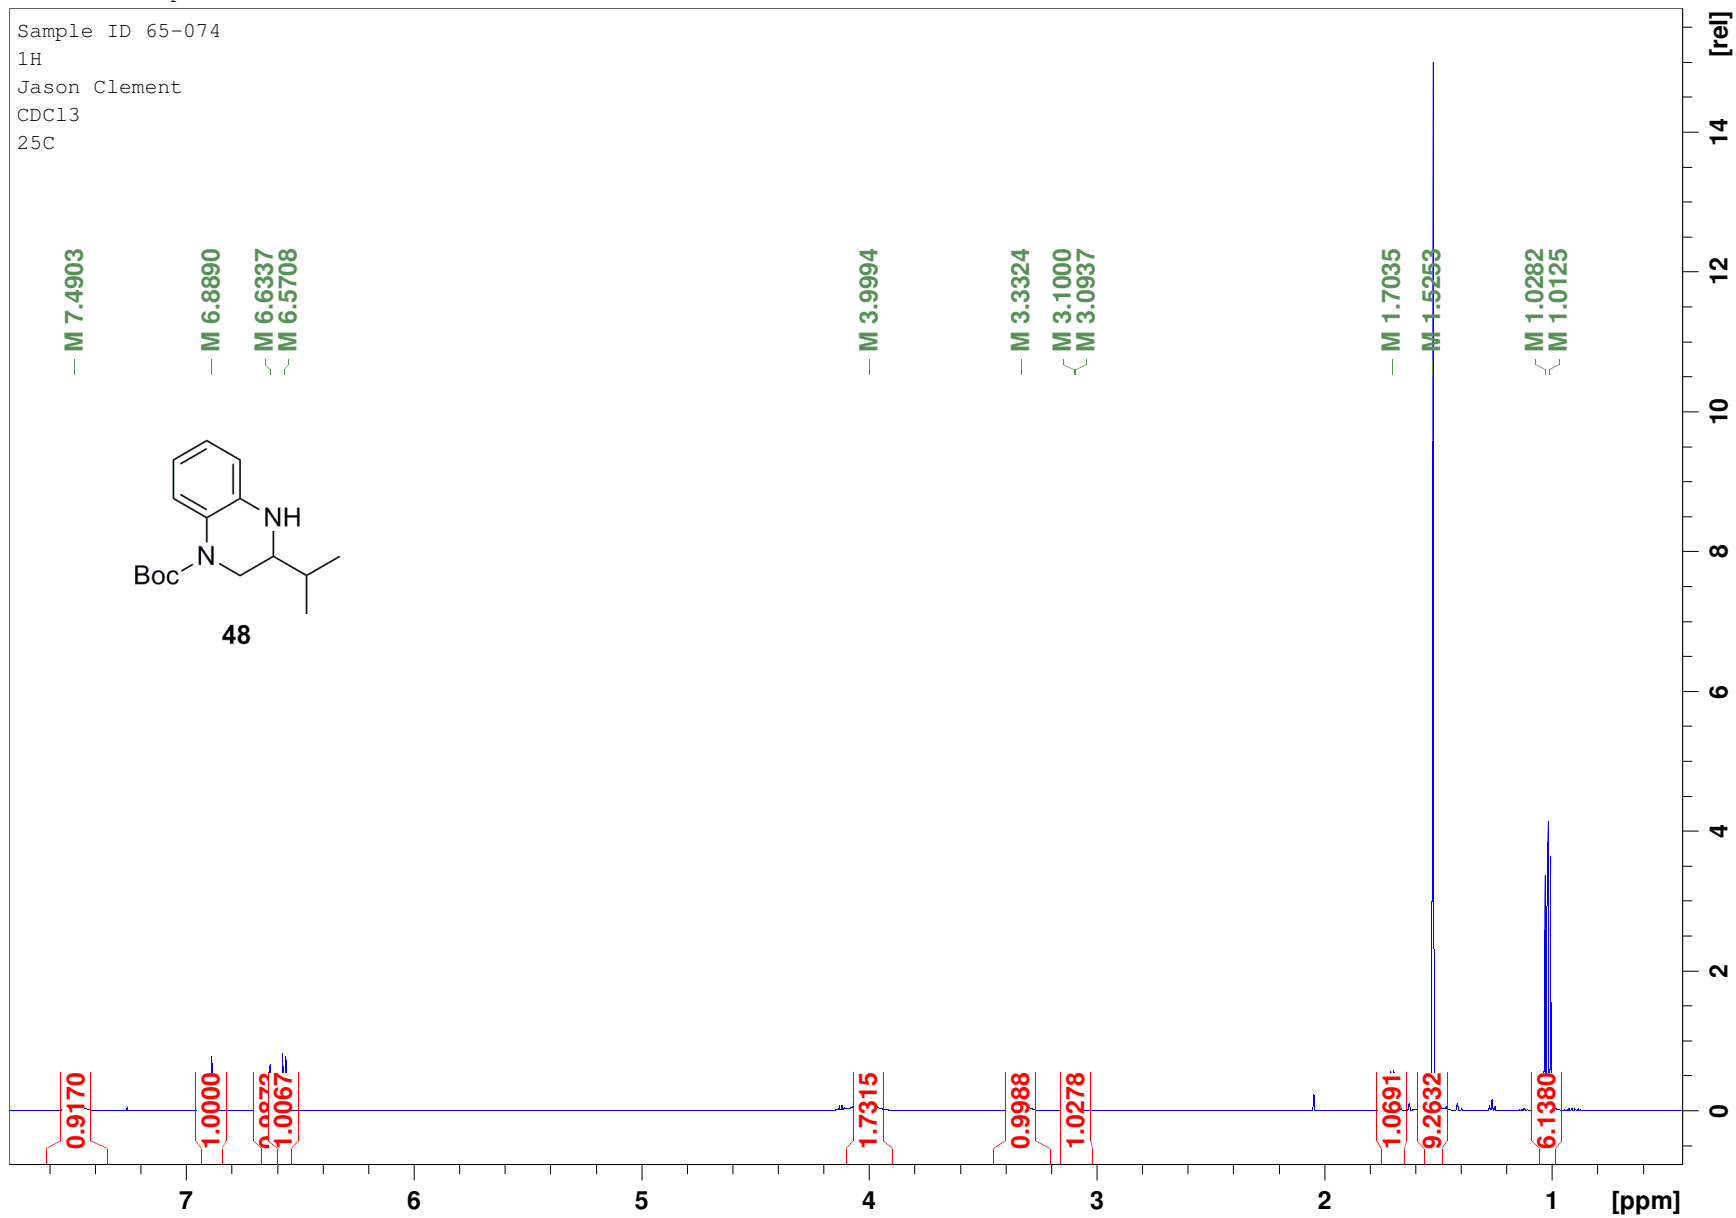

"Results sample ID 65-074" 1 1 C:\Users\Jason\Documents\BSBIstuff\MedChem

Sample ID 65-074  
1H  
Jason Clement  
CDCl3  
25C

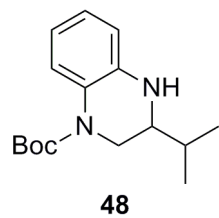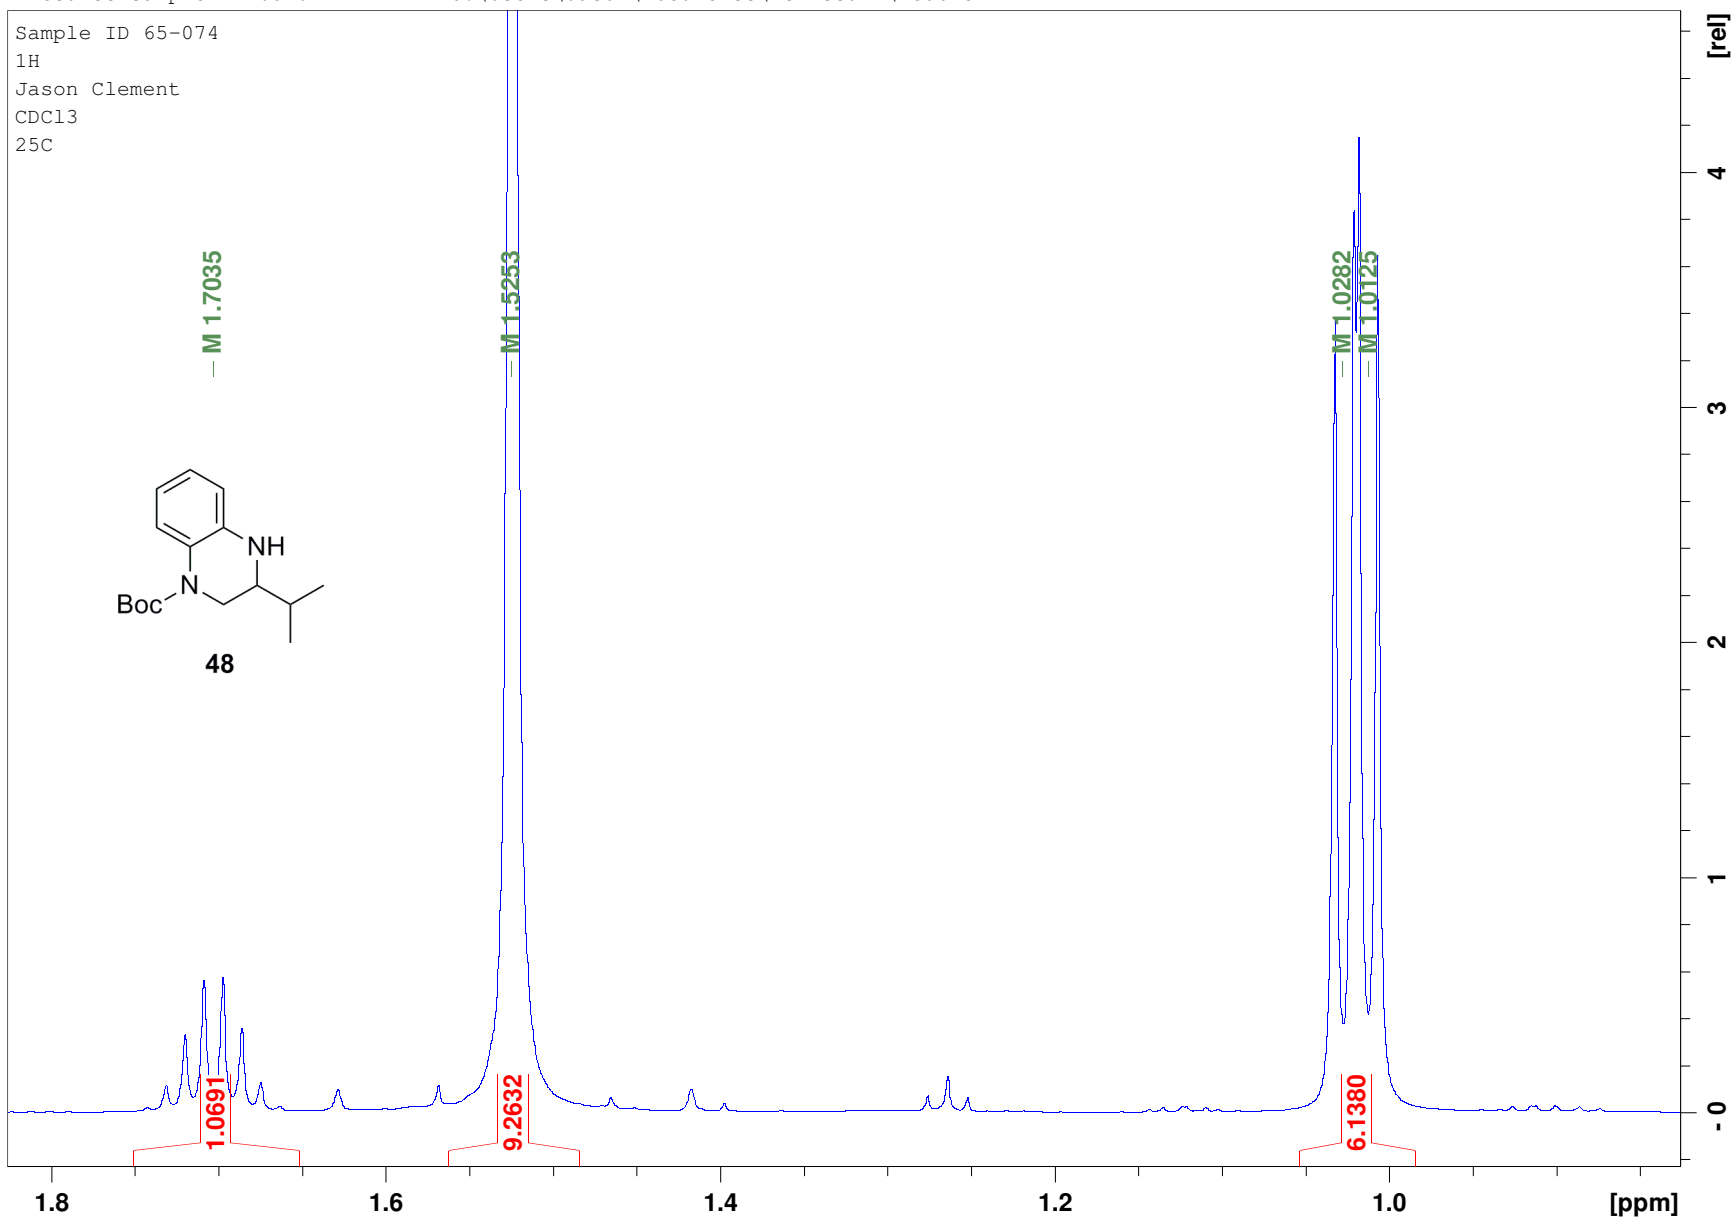

"Results sample ID 65-074" 1 1 C:\Users\Jason\Documents\BSBIstuff\MedChem

Sample ID 65-074

<sup>1</sup>H

Jason Clement

CDCl<sub>3</sub>

25C

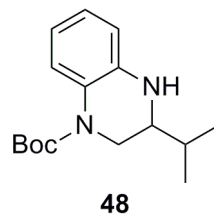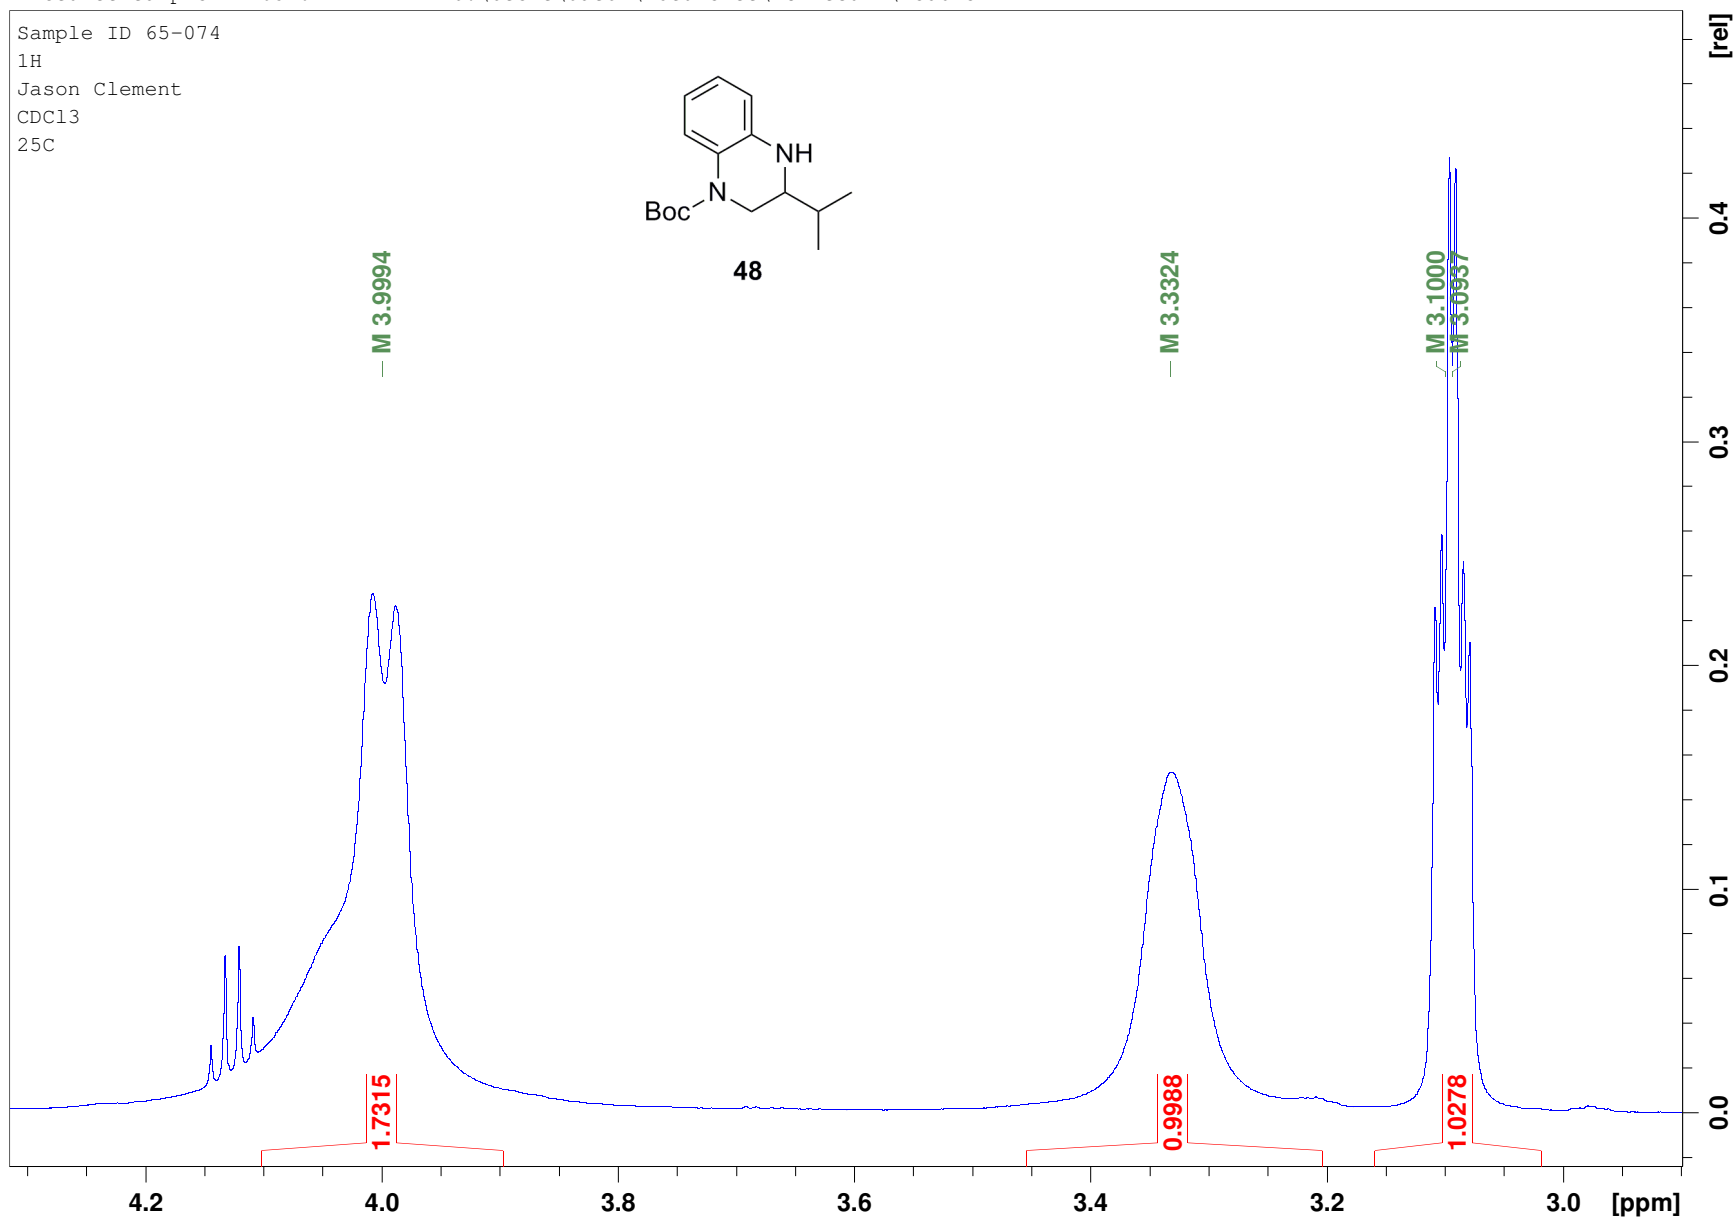

"Results sample ID 65-074" 1 1 C:\Users\Jason\Documents\BSBIstuff\MedChem

Sample ID 65-074  
1H  
Jason Clement  
CDCl3  
25C

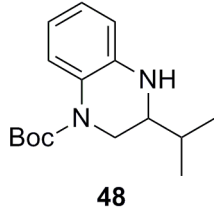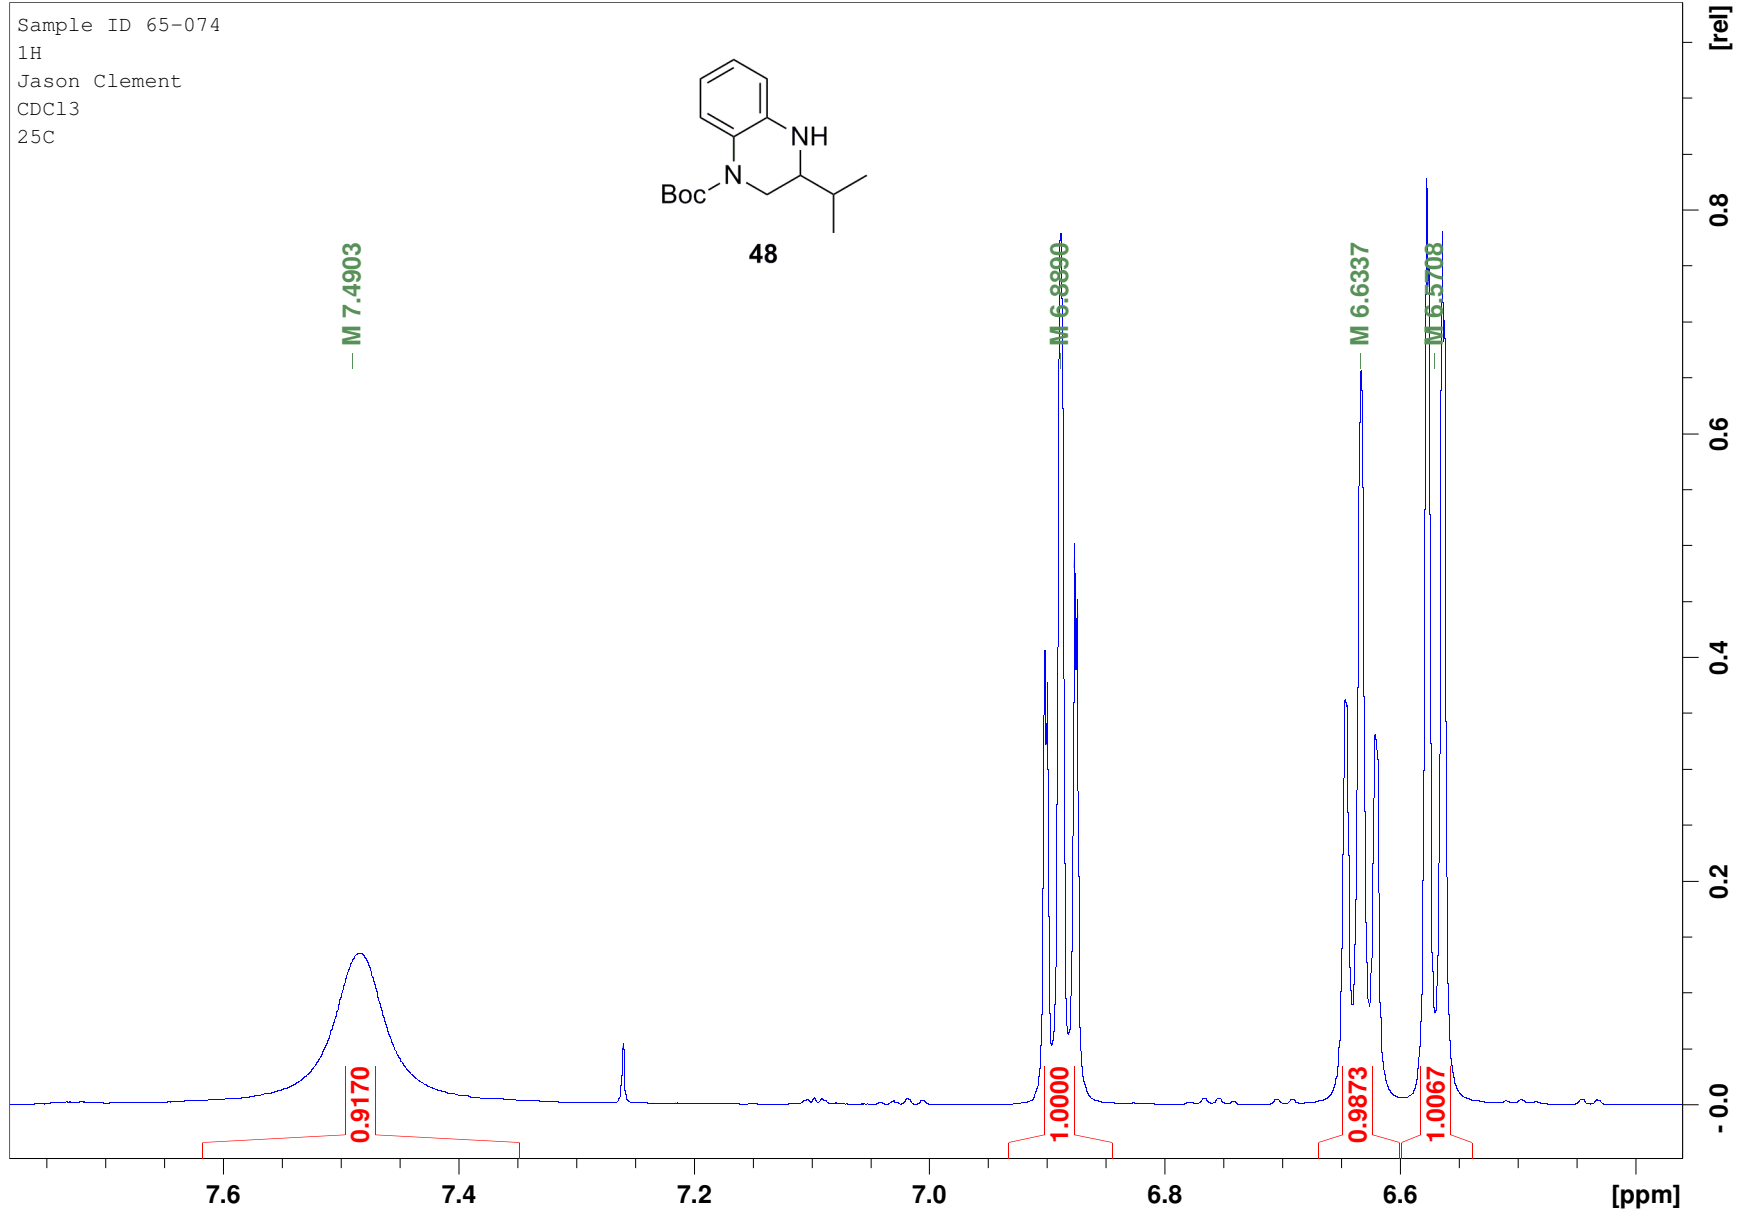

<sup>13</sup>C NMR Spectrum (151 MHz, CDCl<sub>3</sub>) of 48

"Results sample ID 65-074" 4 1 C:\Users\Jason\Documents\BSBIstuff\MedChem

Sample ID 65-074  
13C  
Jason Clement  
CDCl<sub>3</sub>  
25C

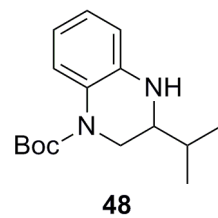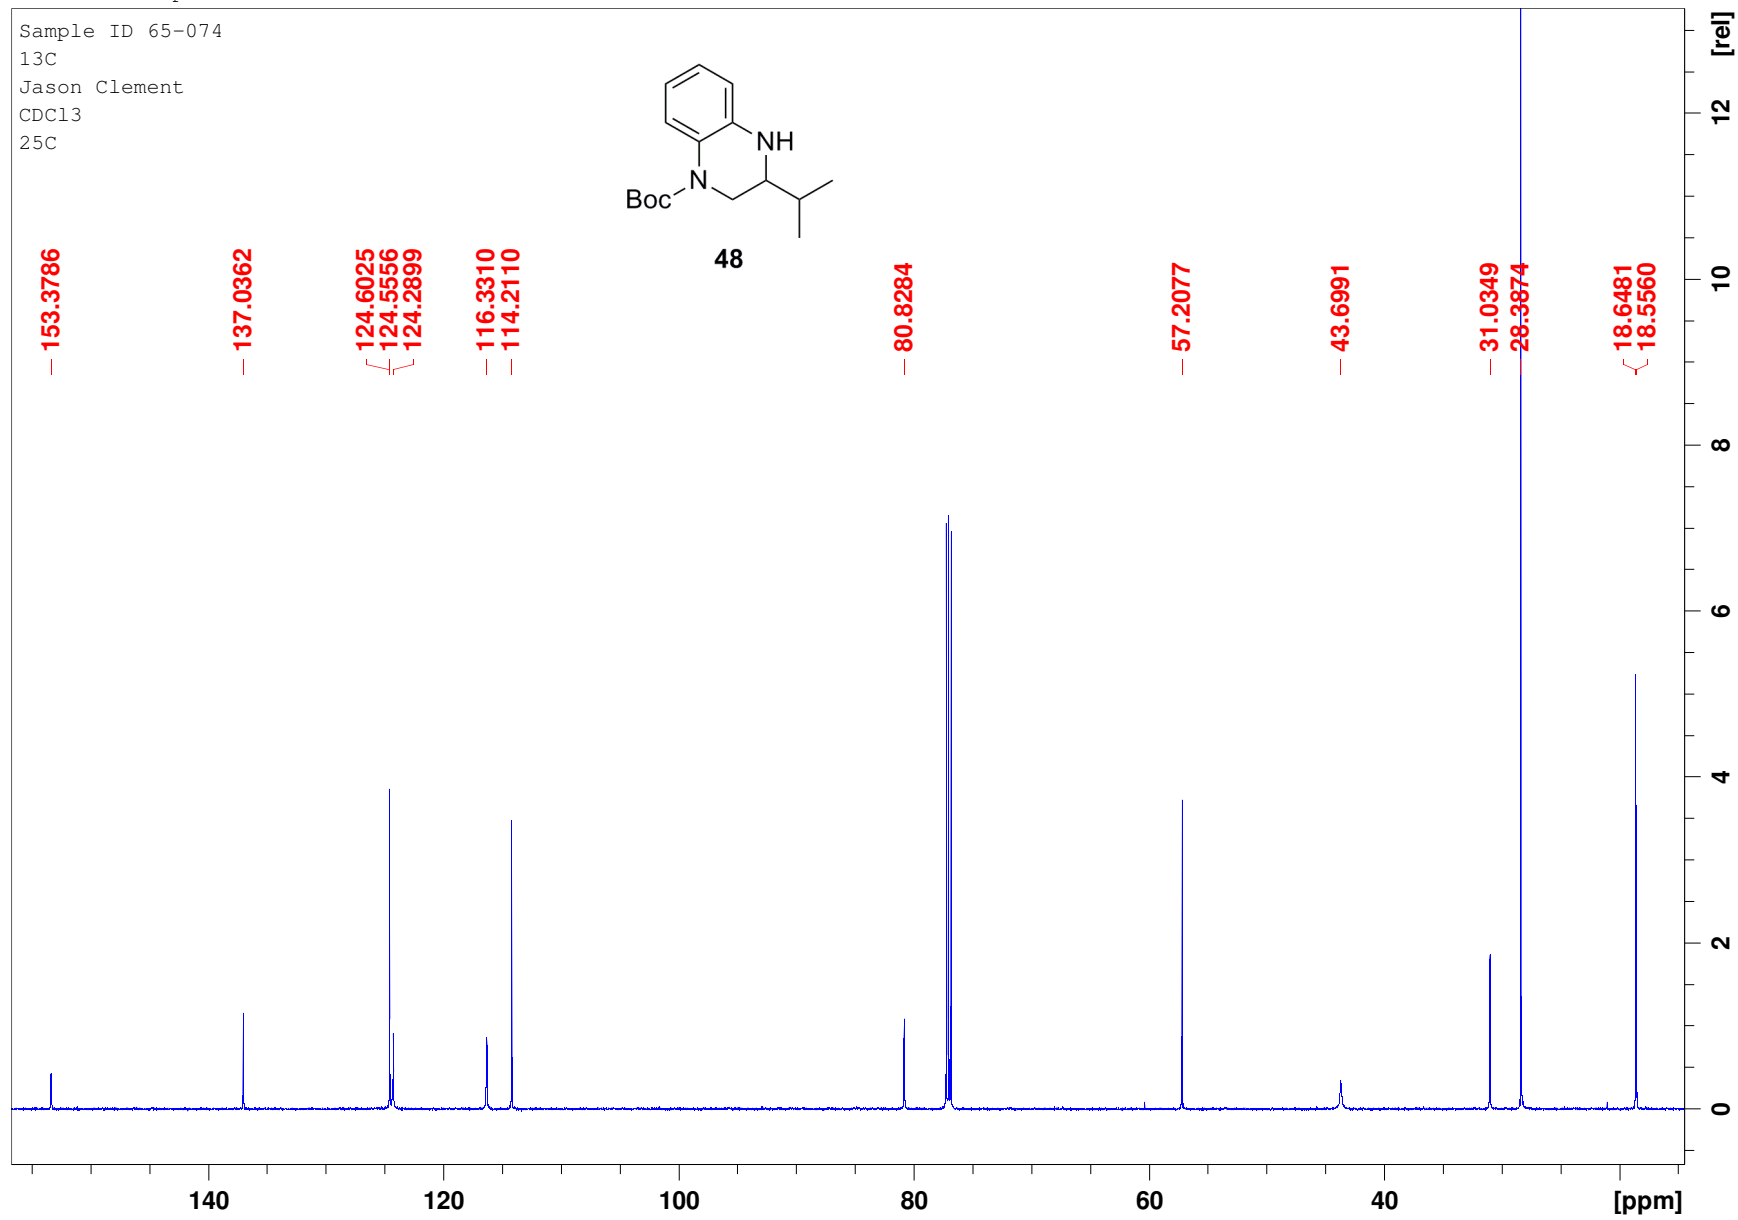



"Results sample ID 65-074" 4 1 C:\Users\Jason\Documents\BSBIstuff\MedChem

Sample ID 65-074

13C

Jason Clement

CDCl3

25C

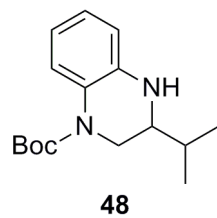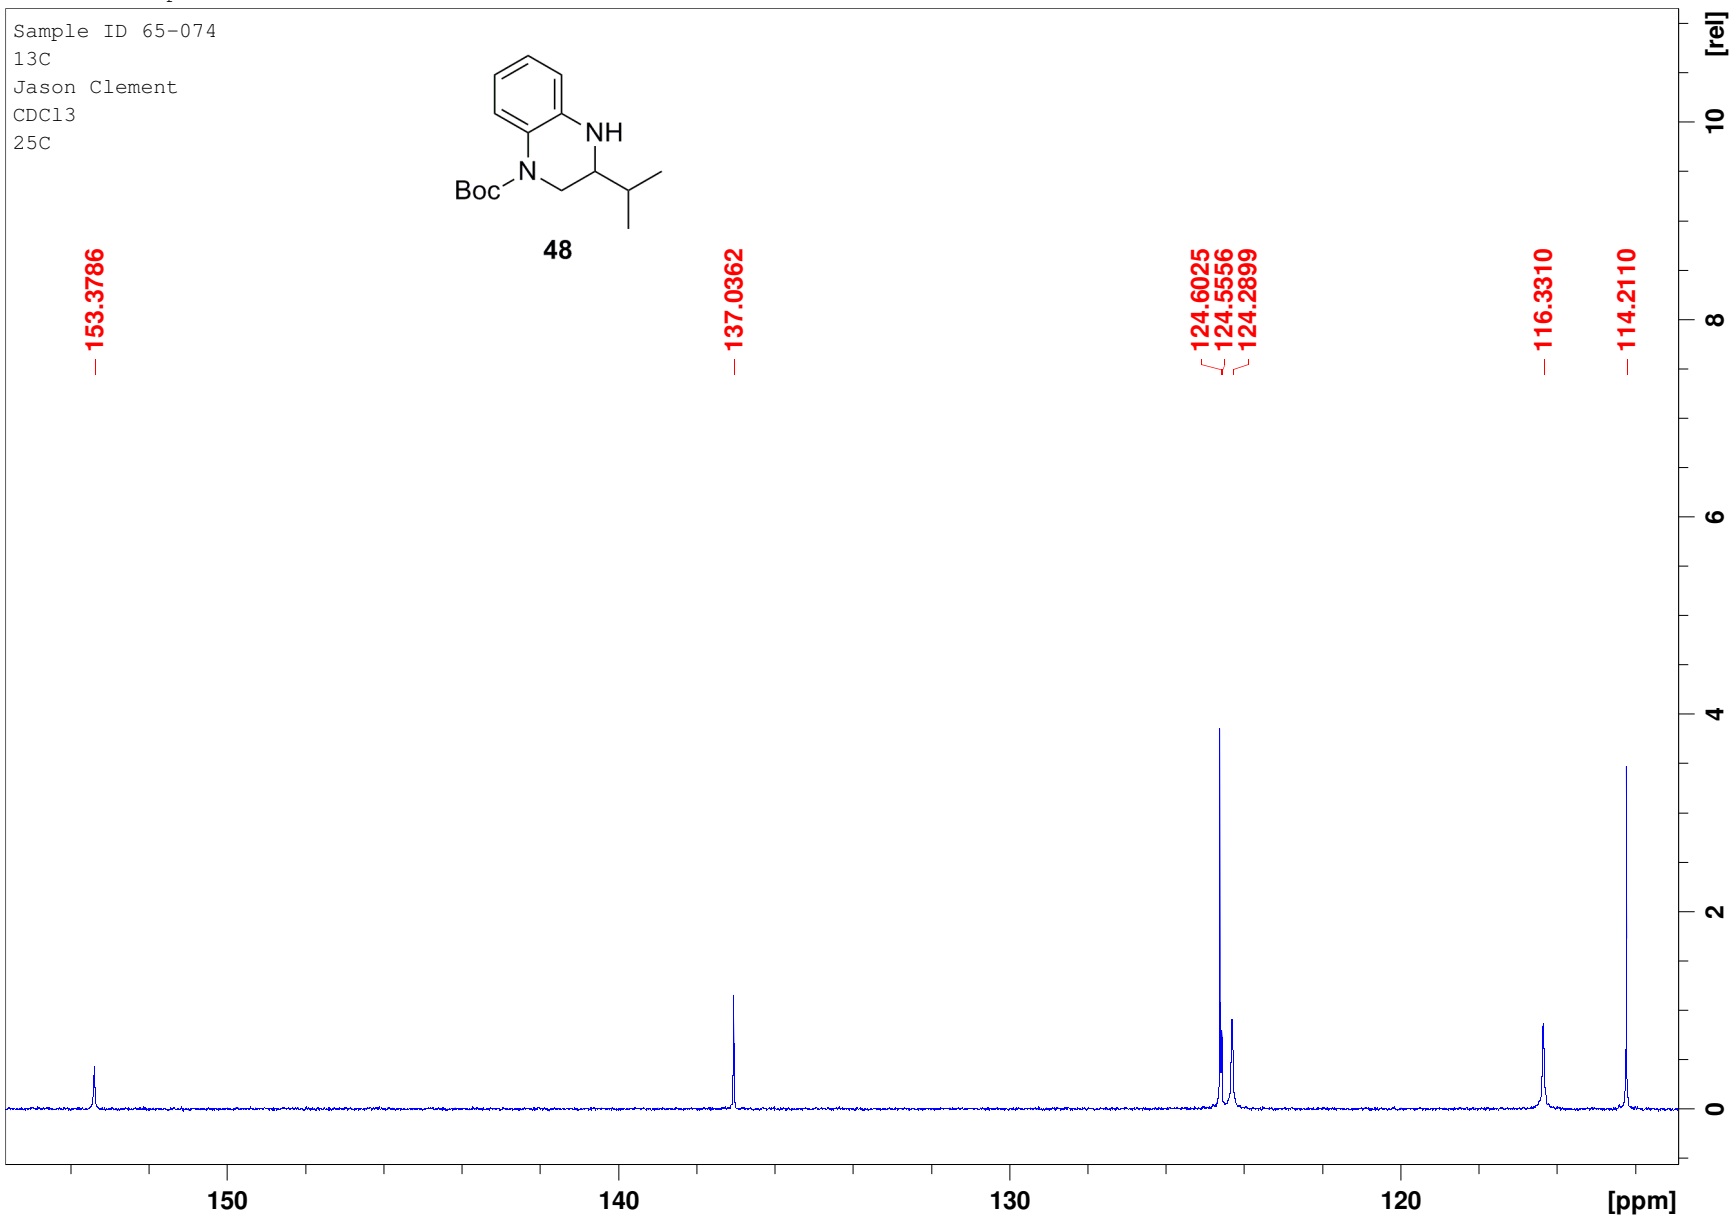

"Results sample ID 65-074" 4 1 C:\Users\Jason\Documents\BSBIstuff\MedChem

Sample ID 65-074  
13C  
Jason Clement  
CDCl3  
25C

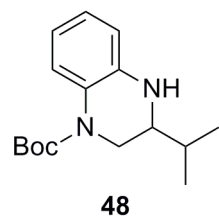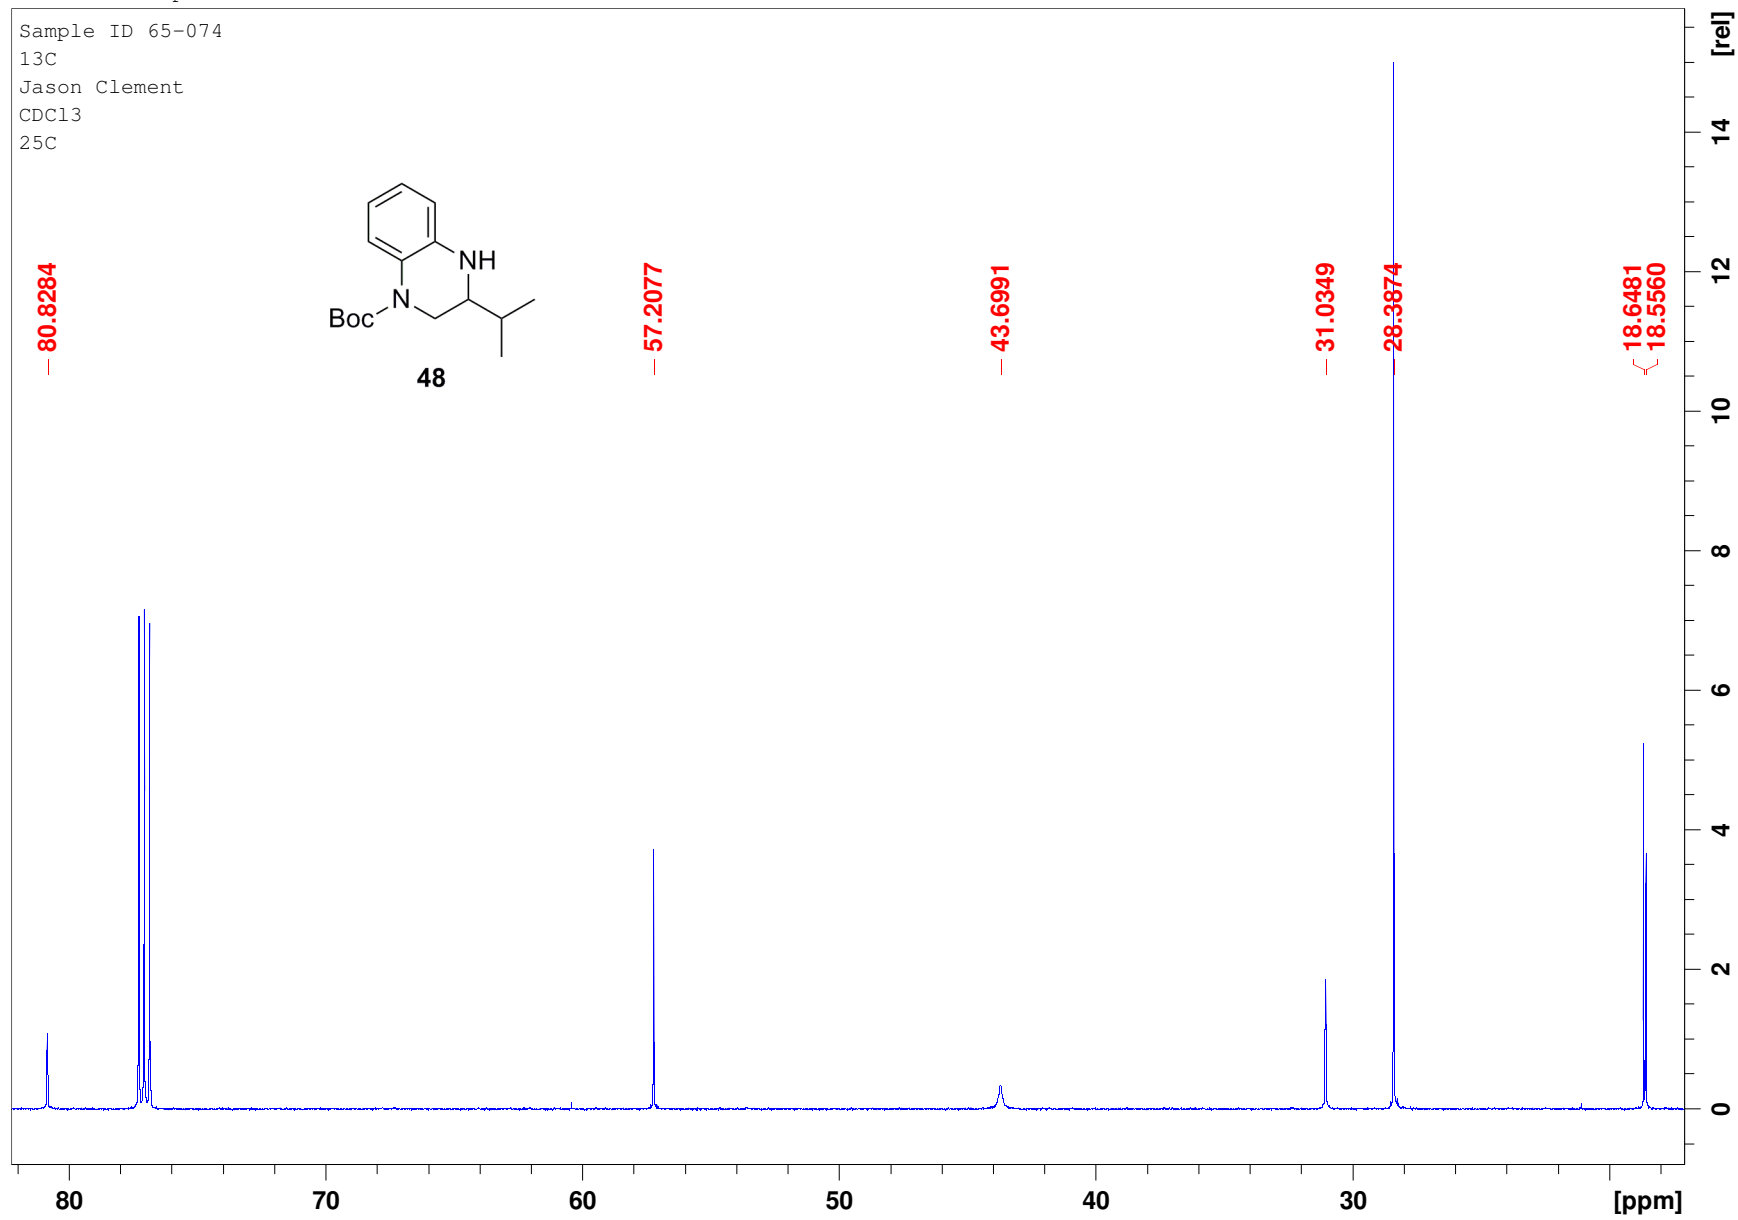

# HSQC Spectrum (CDCl<sub>3</sub>) of 48

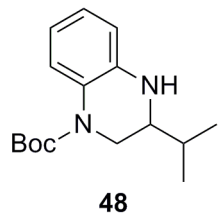

"Results sample ID 65-074" 5 1 C:\Users\Jason\Documents\BSB\stuff\MedChem

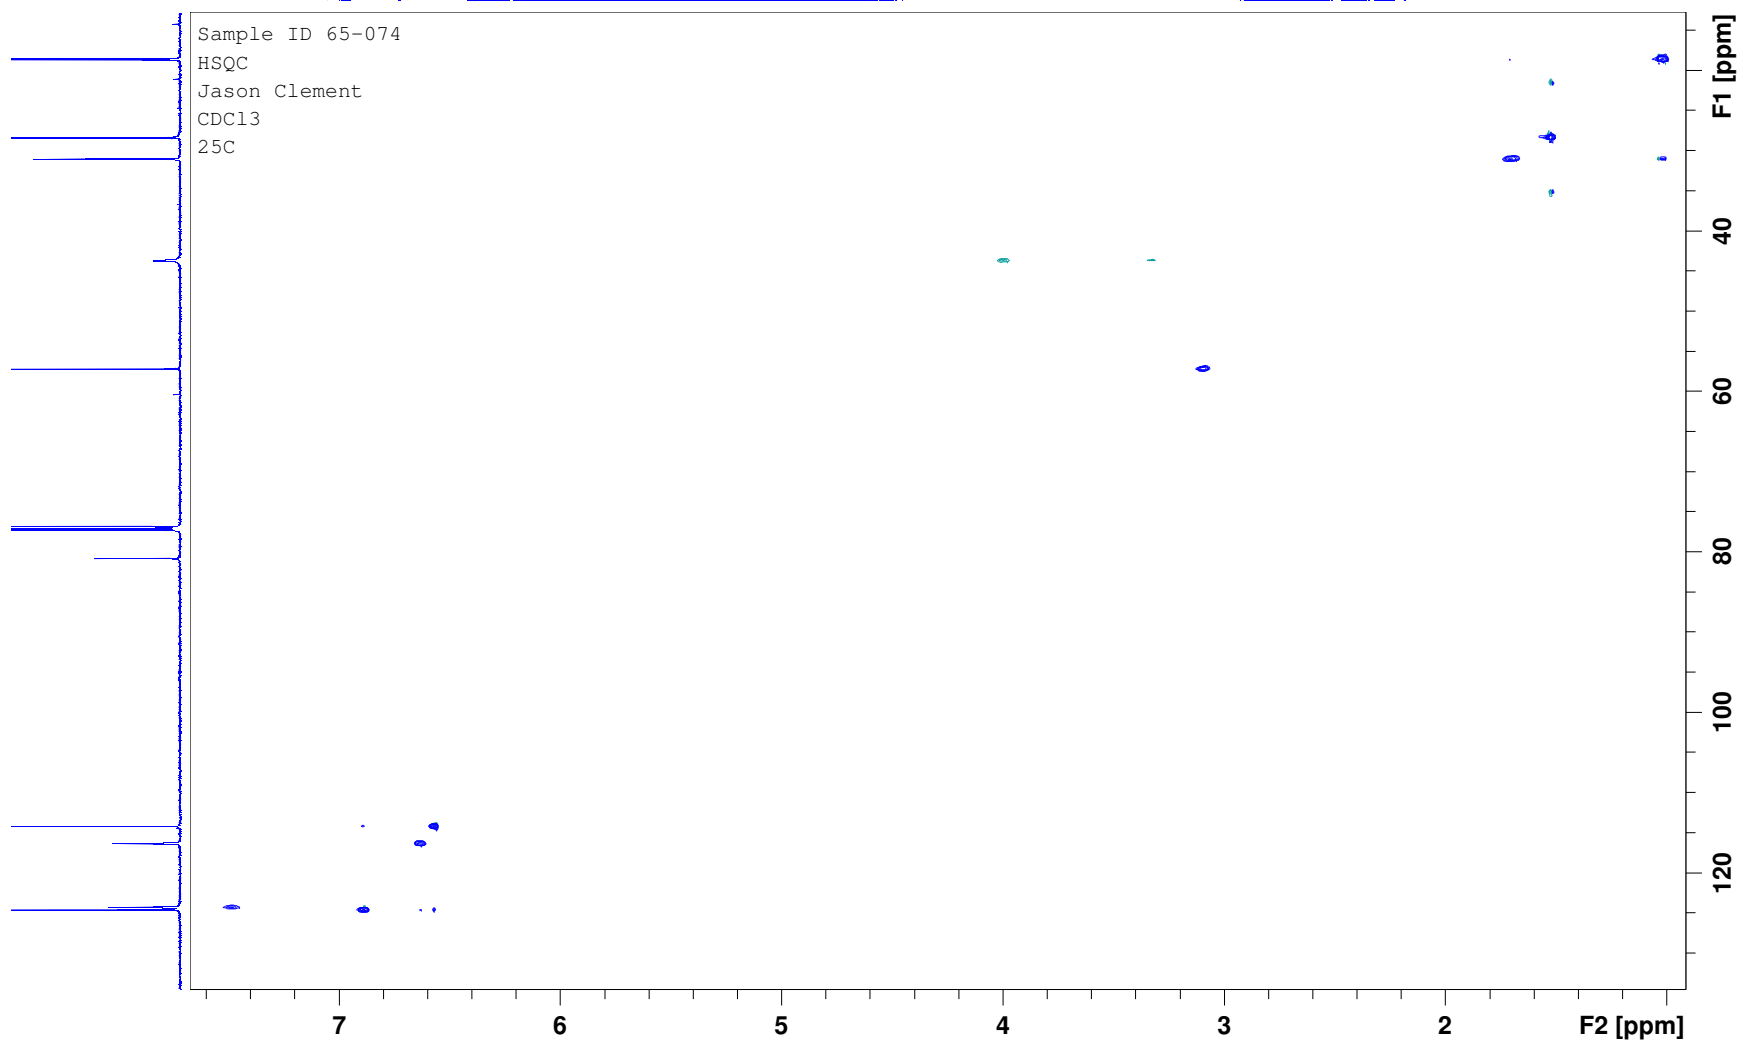

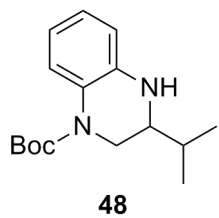

"Results sample ID 65-074" 5 1 C:\Users\Jason\Documents\BSBIstuff\MedChem

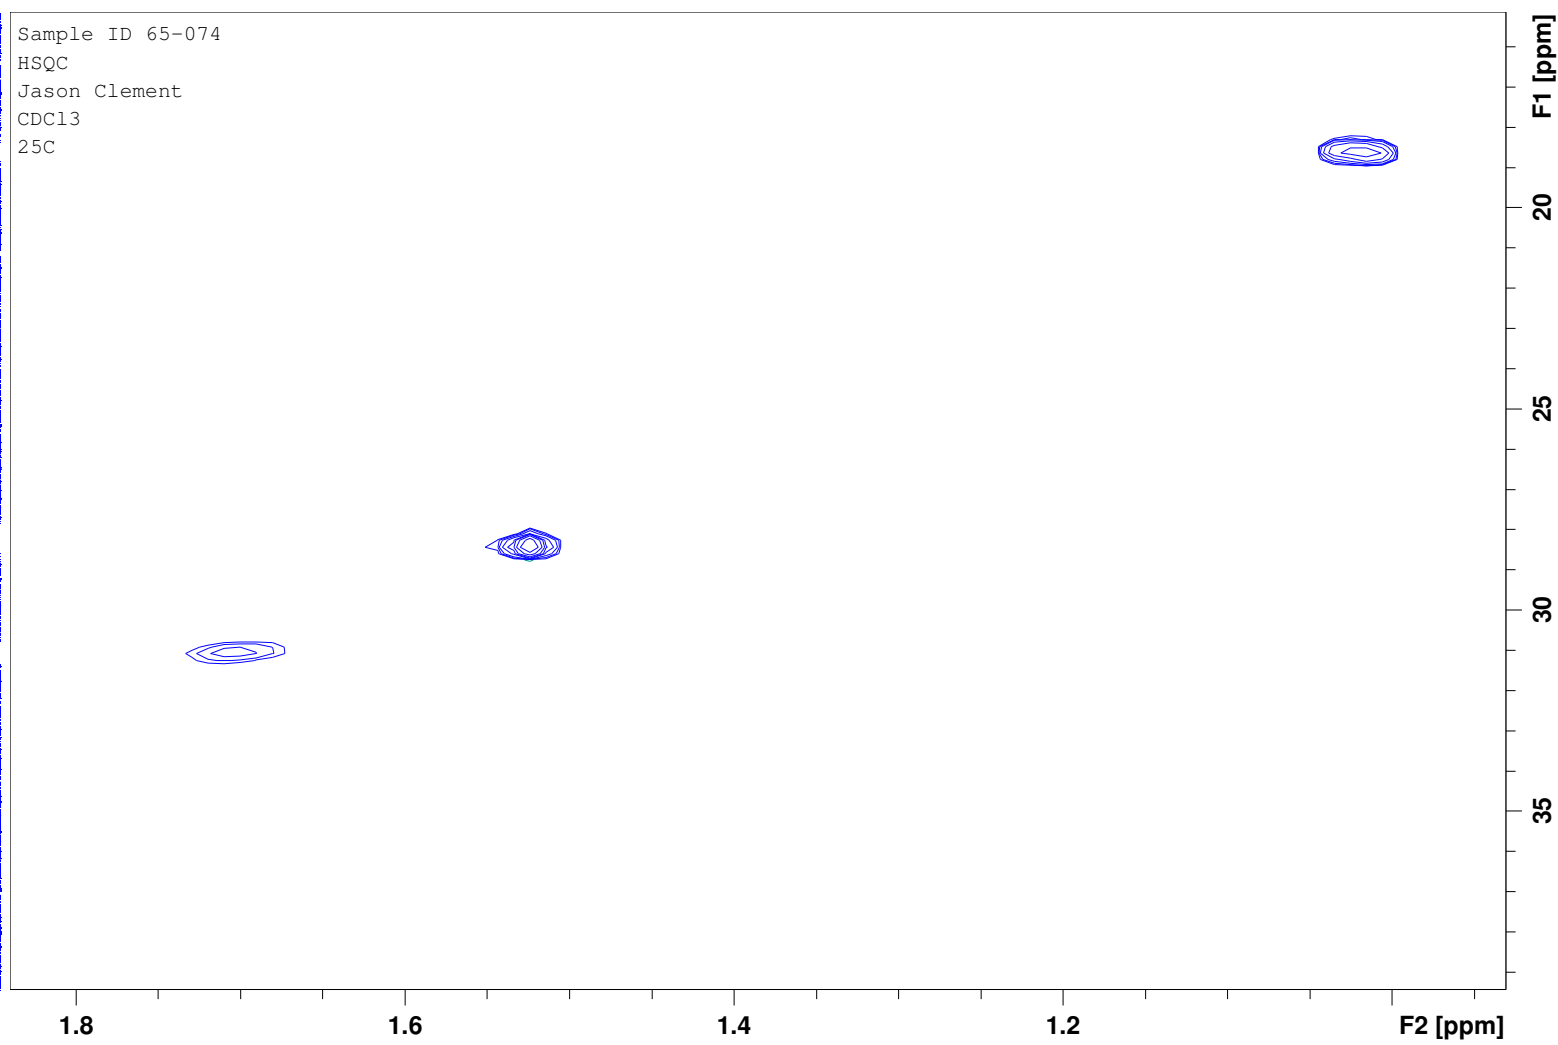

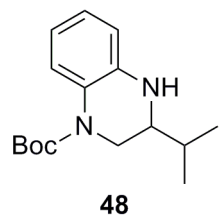

"Results sample ID 65-074" 5 1 C:\Users\Jason\Documents\BSBIstuff\MedChem

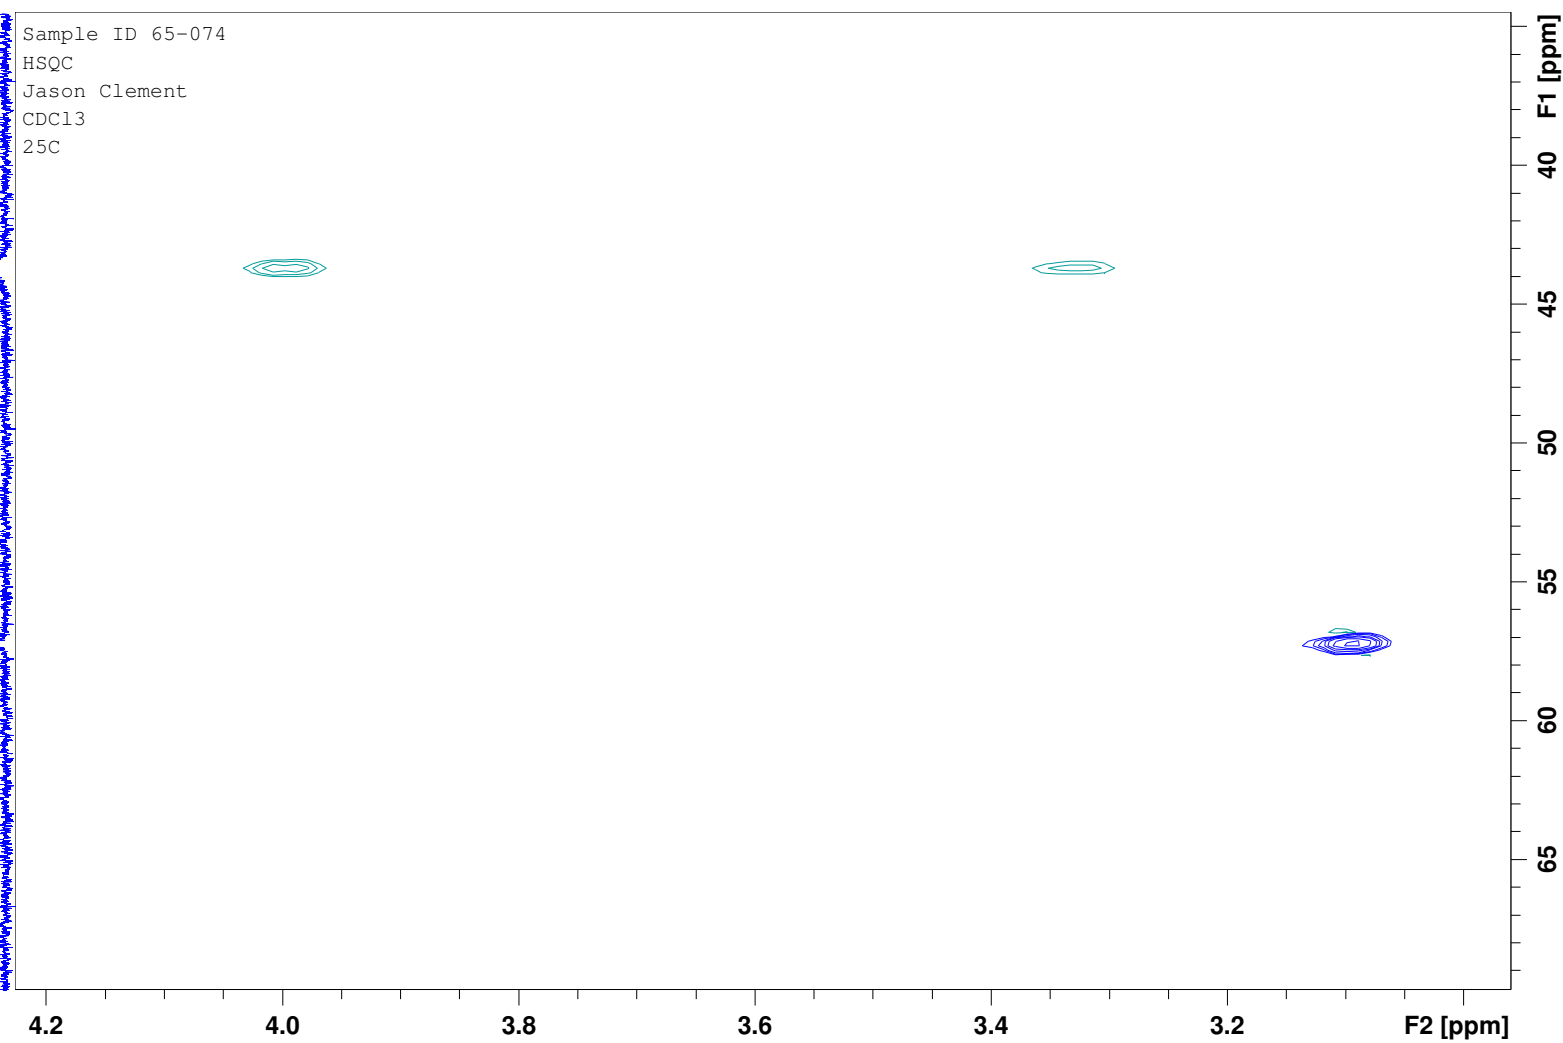

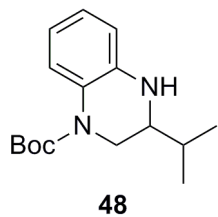

"Results sample ID 65-074" 5 1 C:\Users\Jason\Documents\BSBIstuff\MedChem

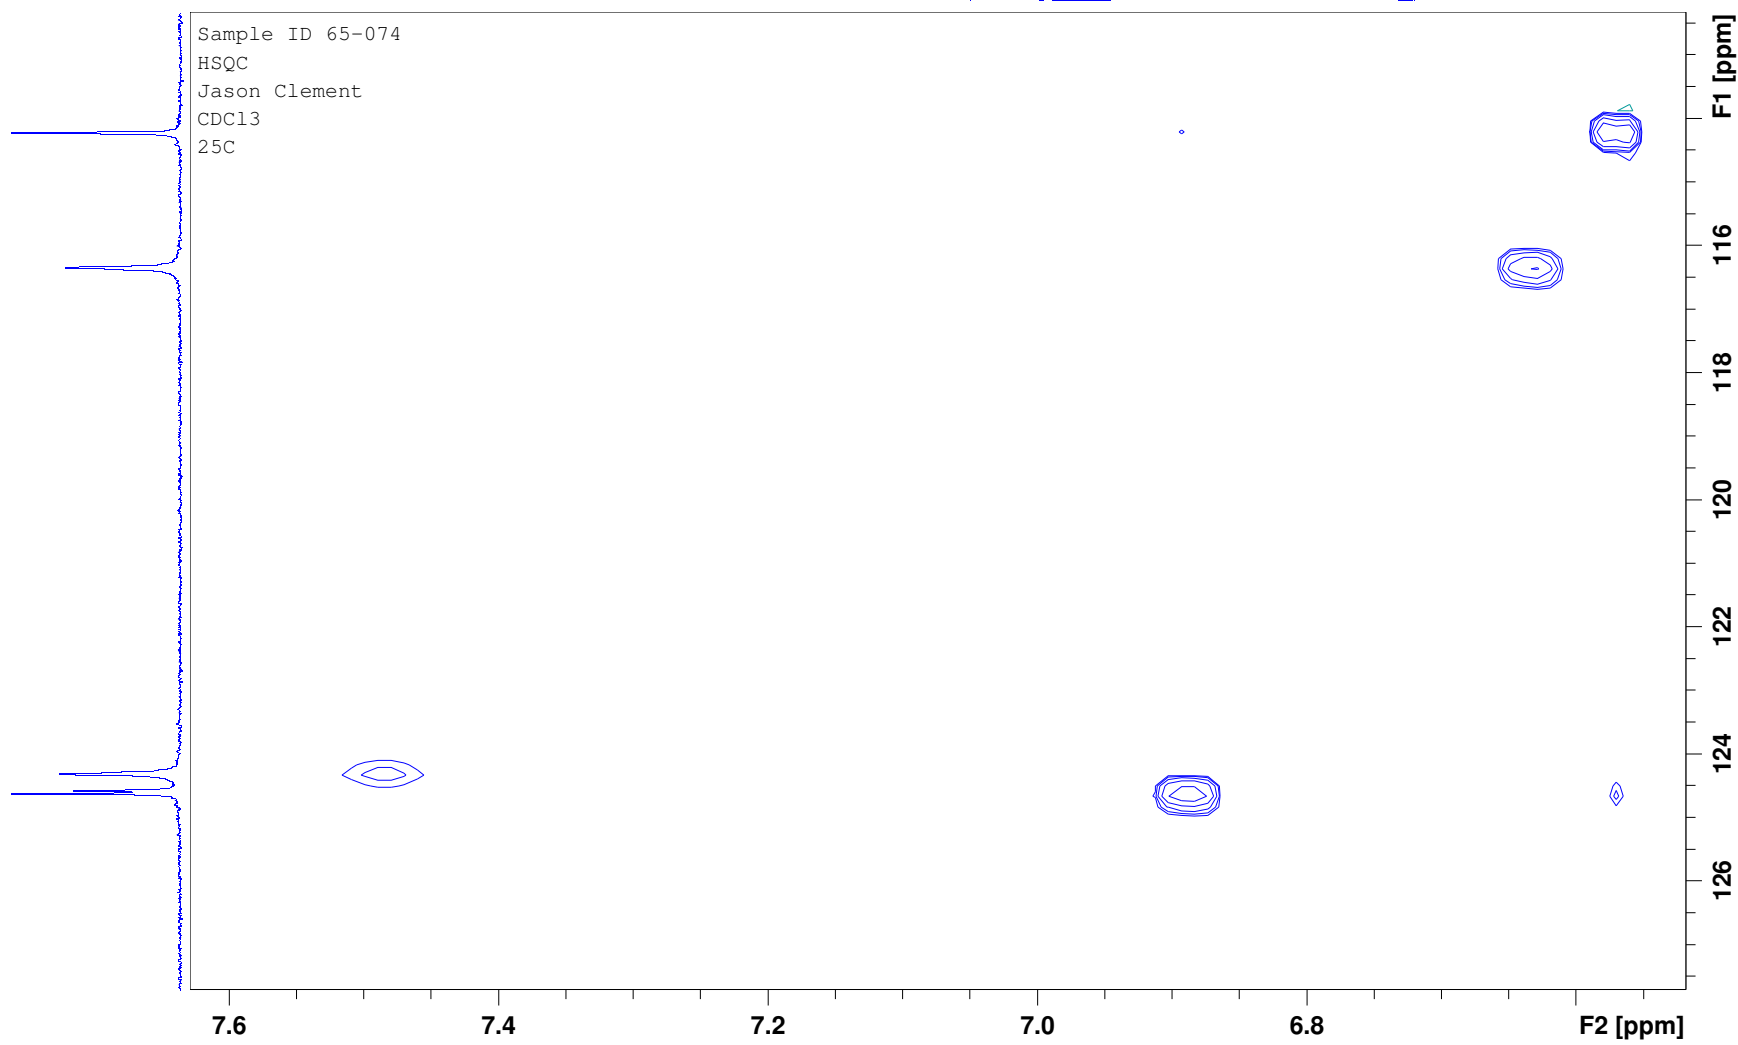

COSY Spectrum (CDCl<sub>3</sub>) of 48

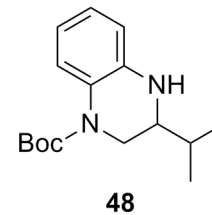

"Results sample ID 65-074" 12 1 C:\Users\Jason\Documents\BSB\stuff\MedChem

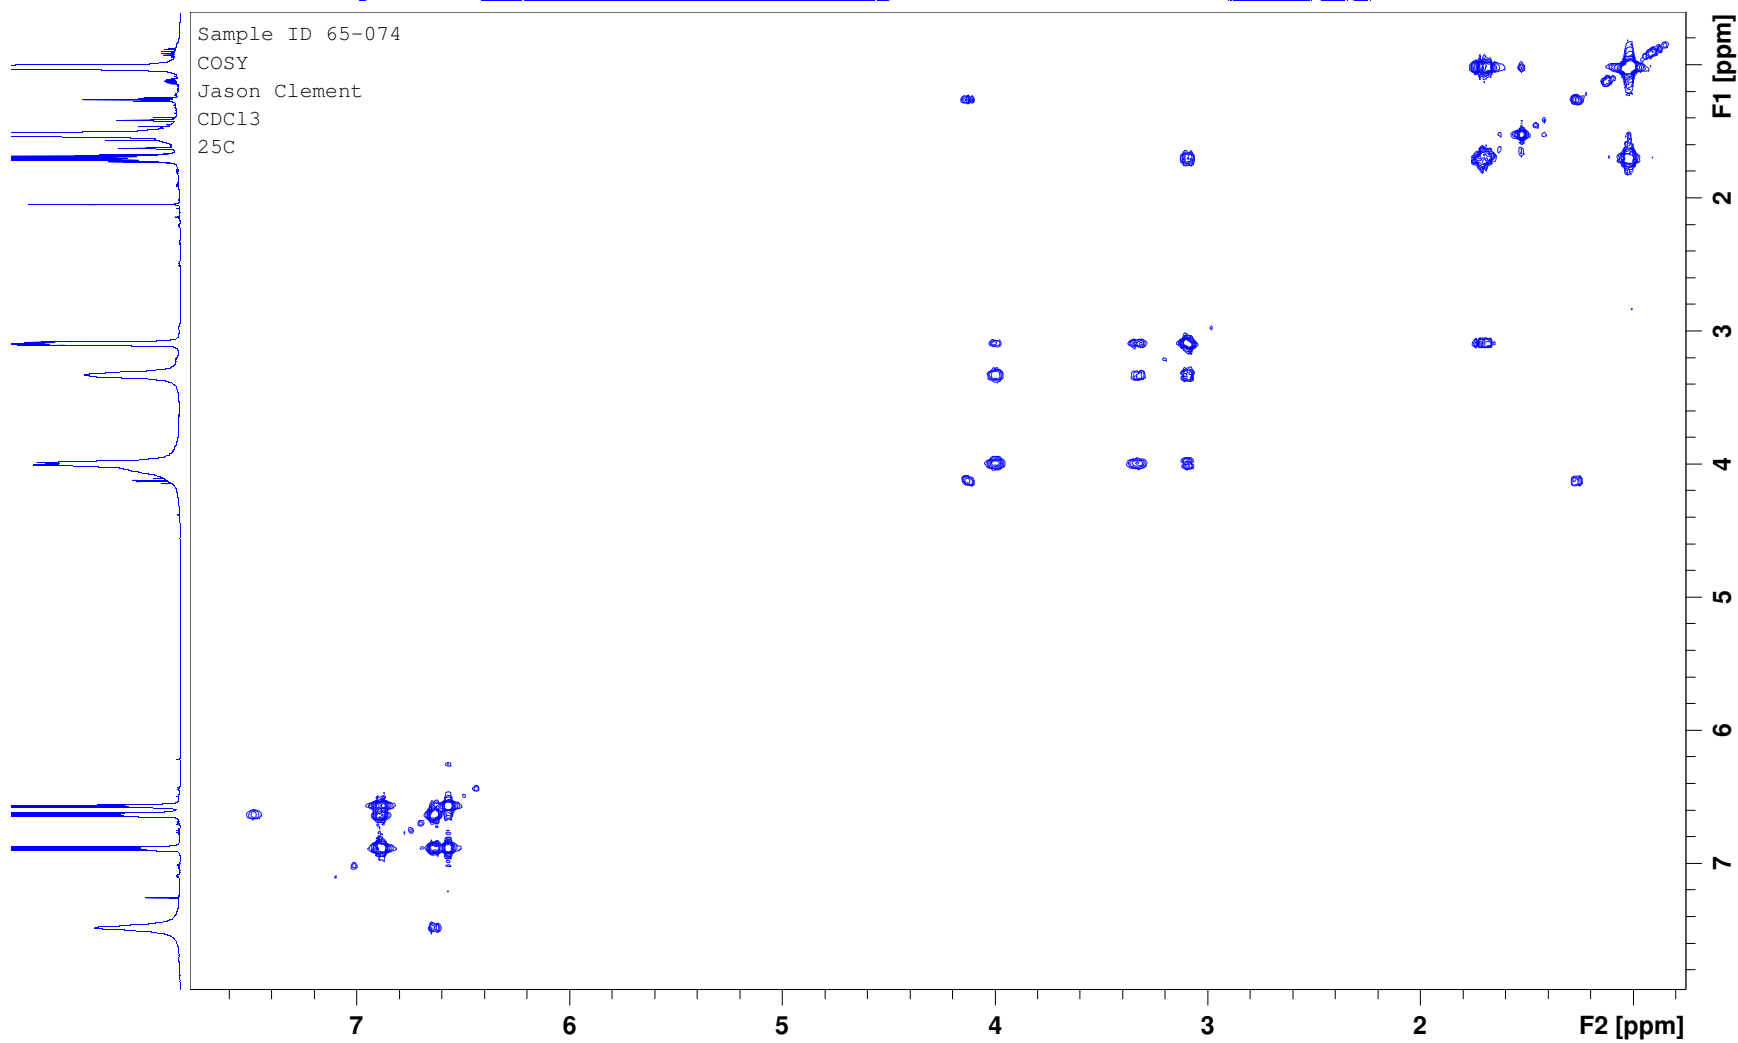

"Results sample ID 65-074" 12 1 C:\Users\Jason\Documents\BSBIstuff\MedChem

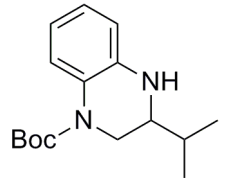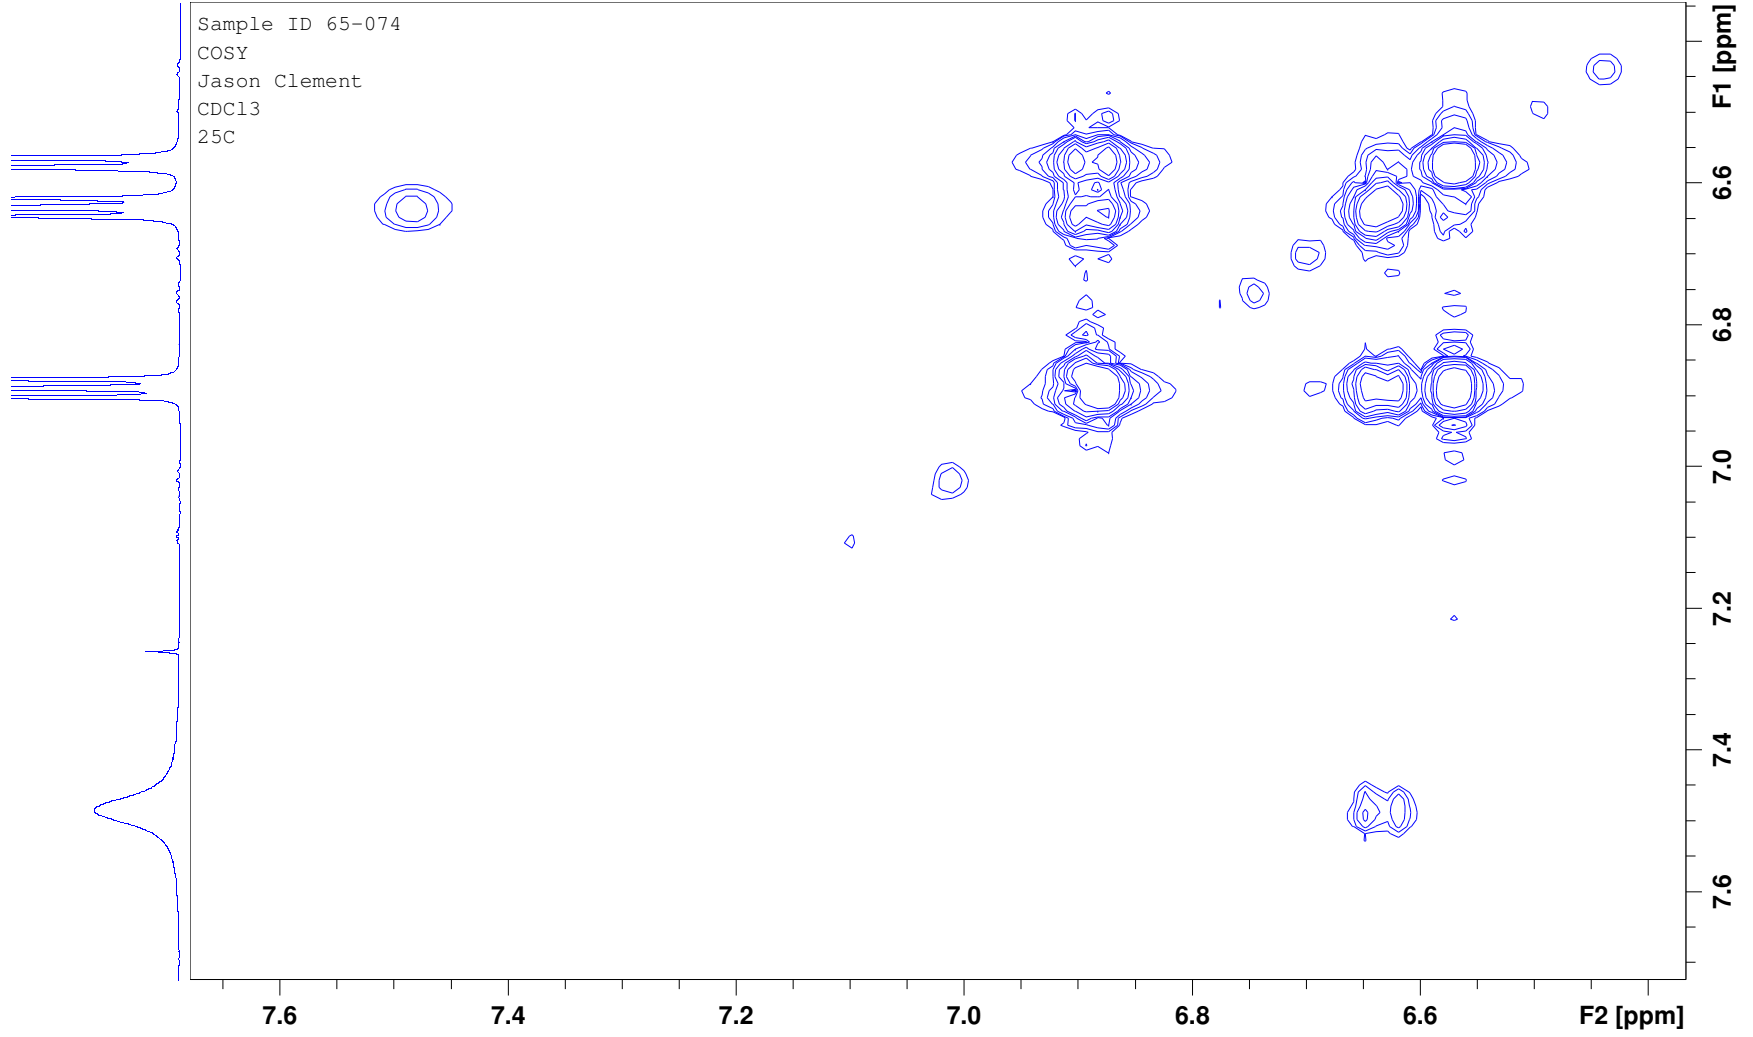



"Results sample ID 65-074" 12 1 C:\Users\Jason\Documents\BSBIstuff\MedChem

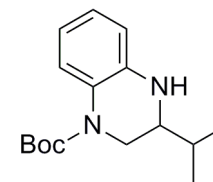

48

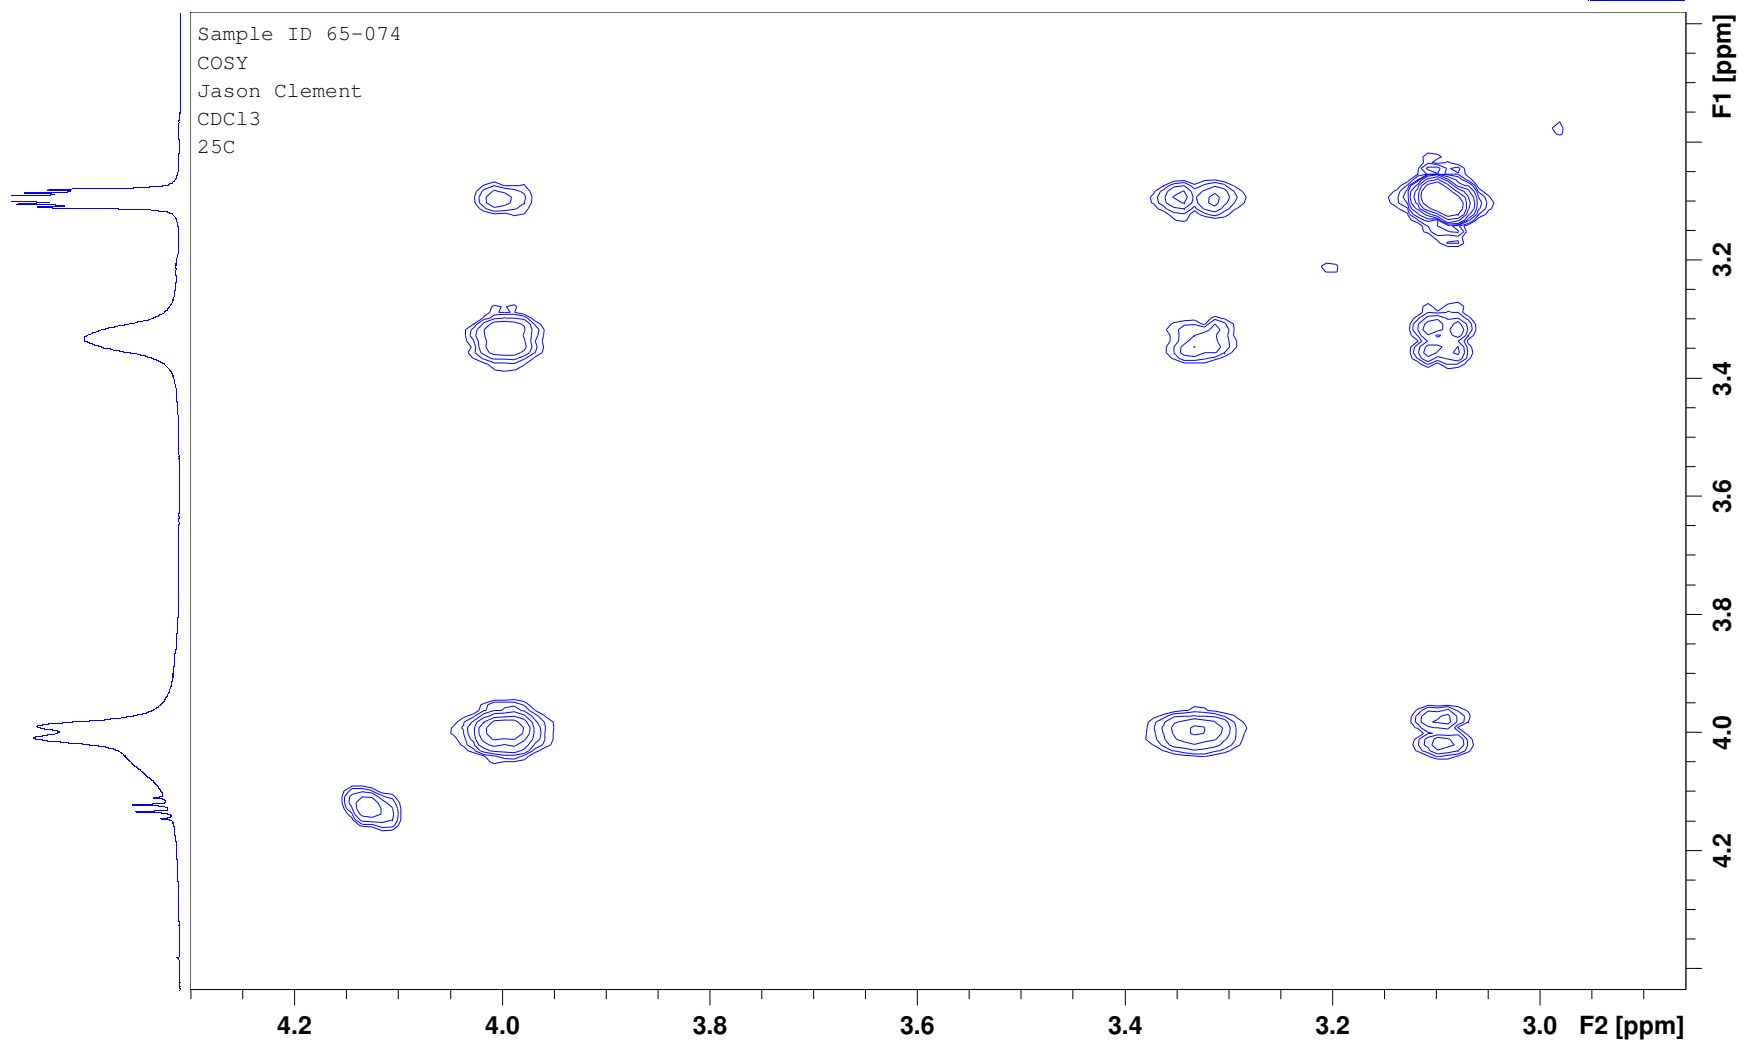

"Results sample ID 65-074" 12 1 C:\Users\Jason\Documents\BSBIstuff\MedChem

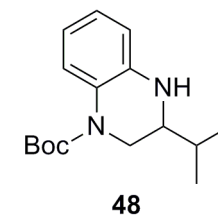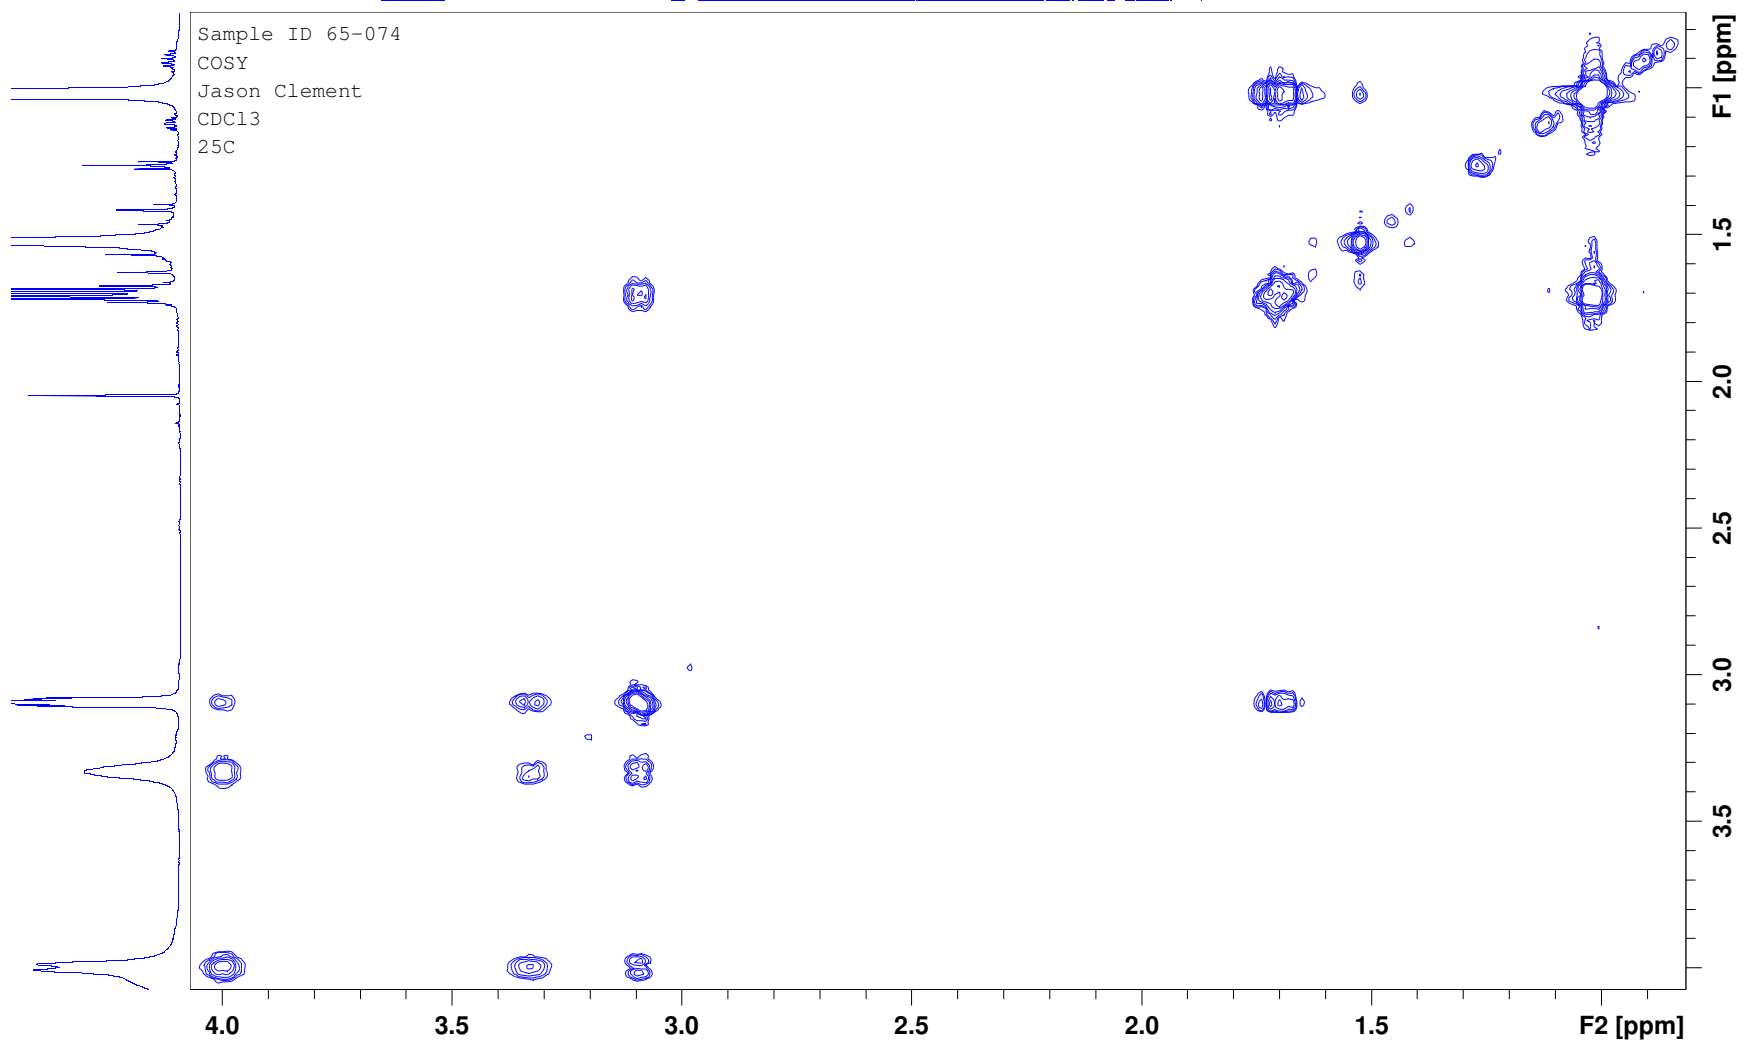

# HMBC Spectrum (CDCl<sub>3</sub>) of 48

"Results sample ID 65-074" 7 1 C:\Users\Jason\Documents\BSBIstuff\MedChem

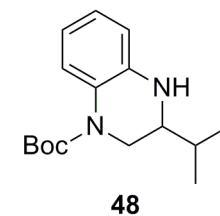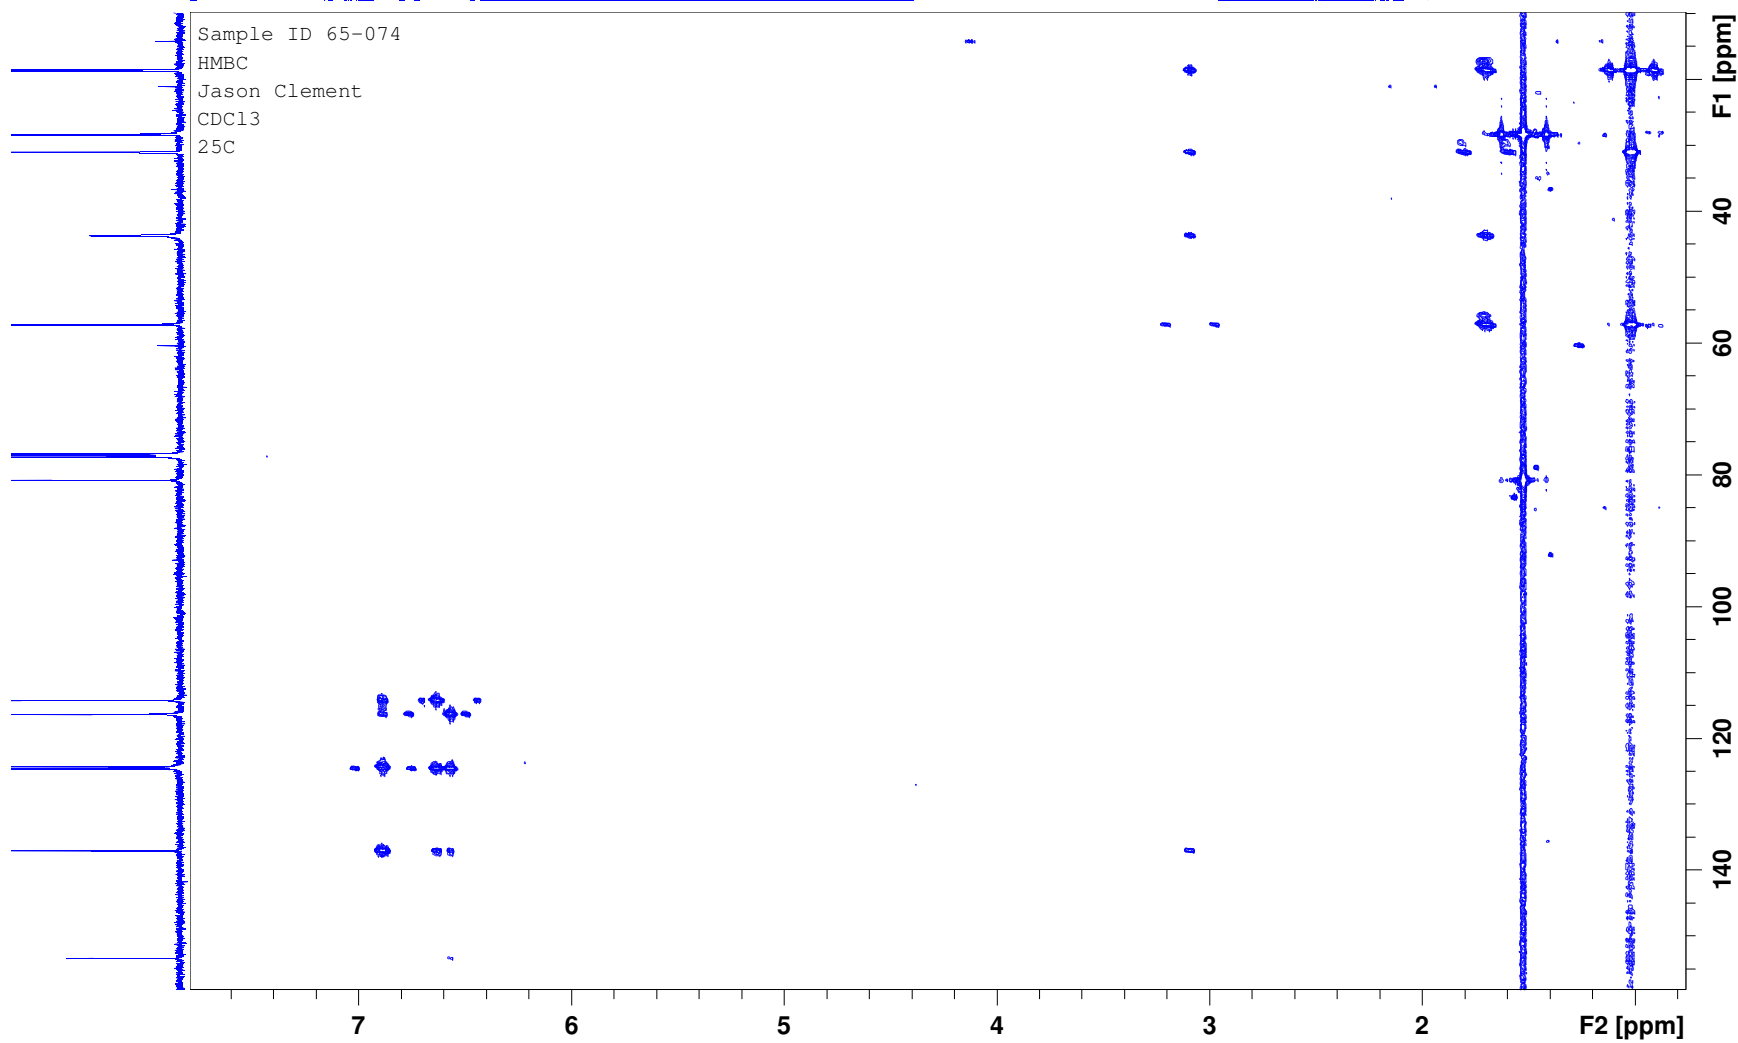

"Results sample ID 65-074" 7 1 C:\Users\Jason\Documents\BSB\stuff\MedChem

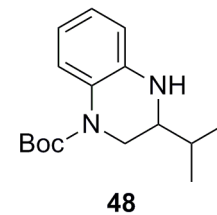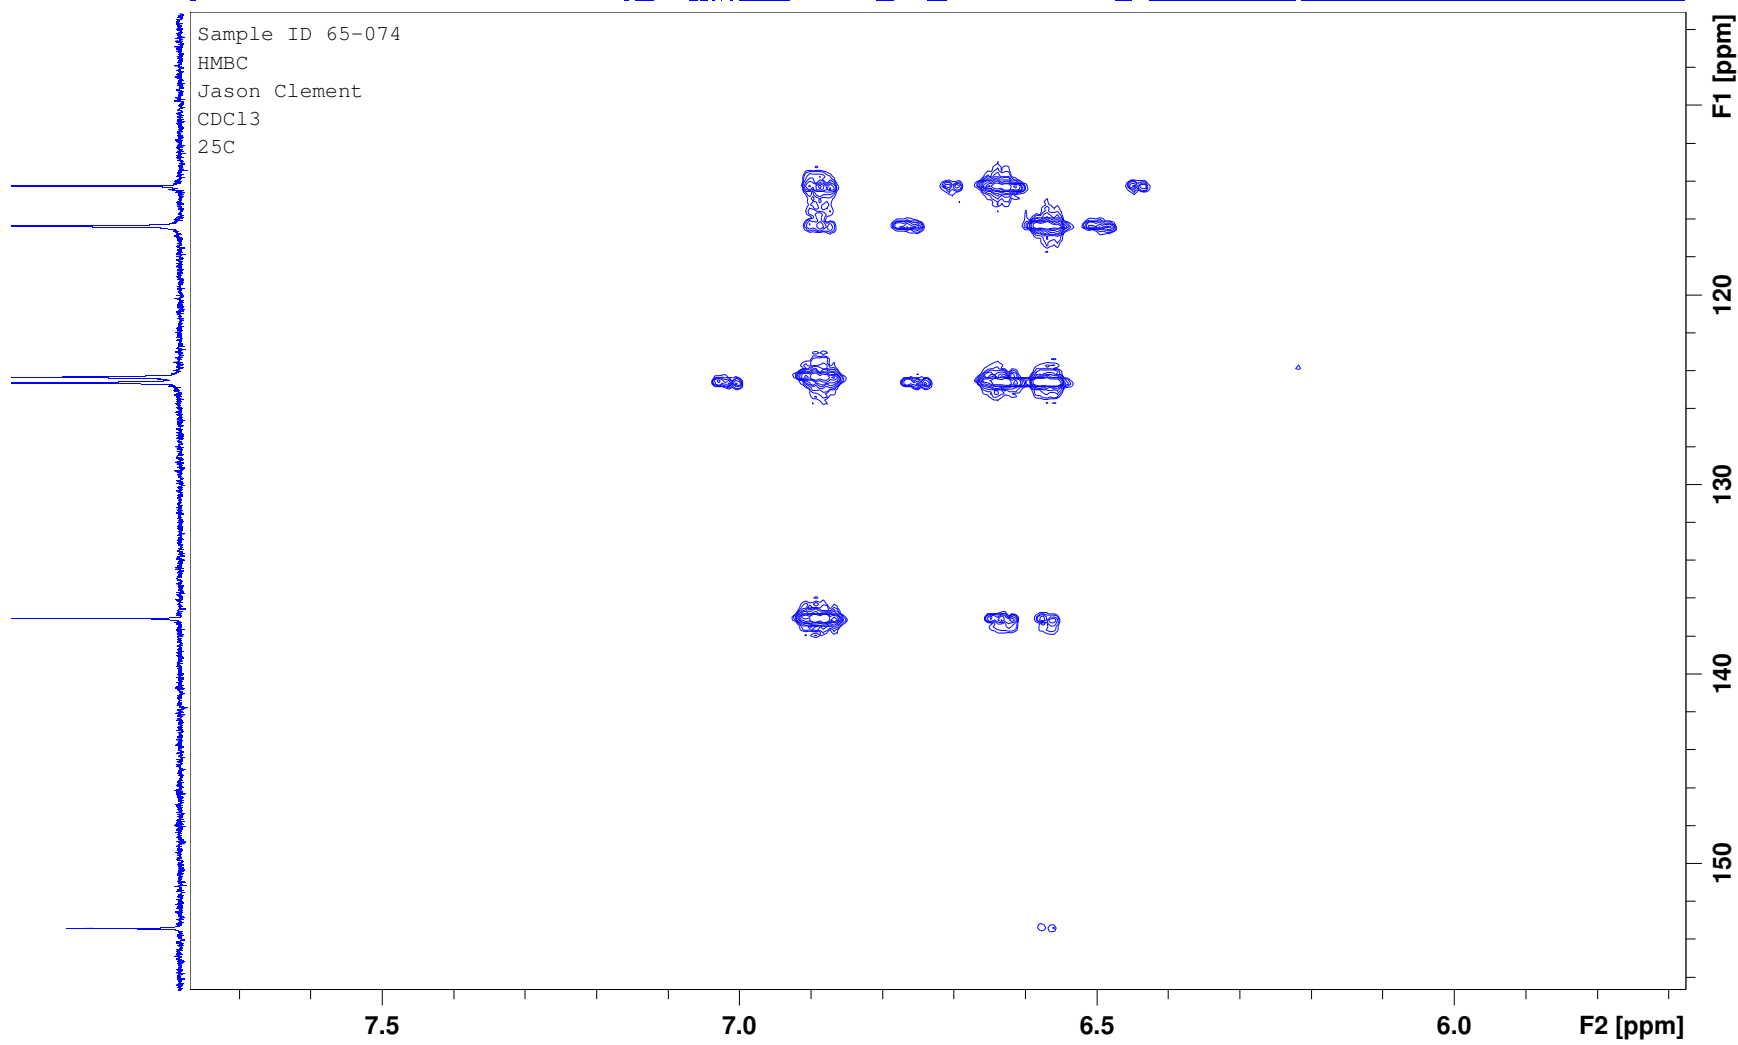

"Results sample ID 65-074" 7 1 C:\Users\Jason\Documents\BSBIstuff\MedChem

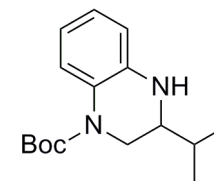

48

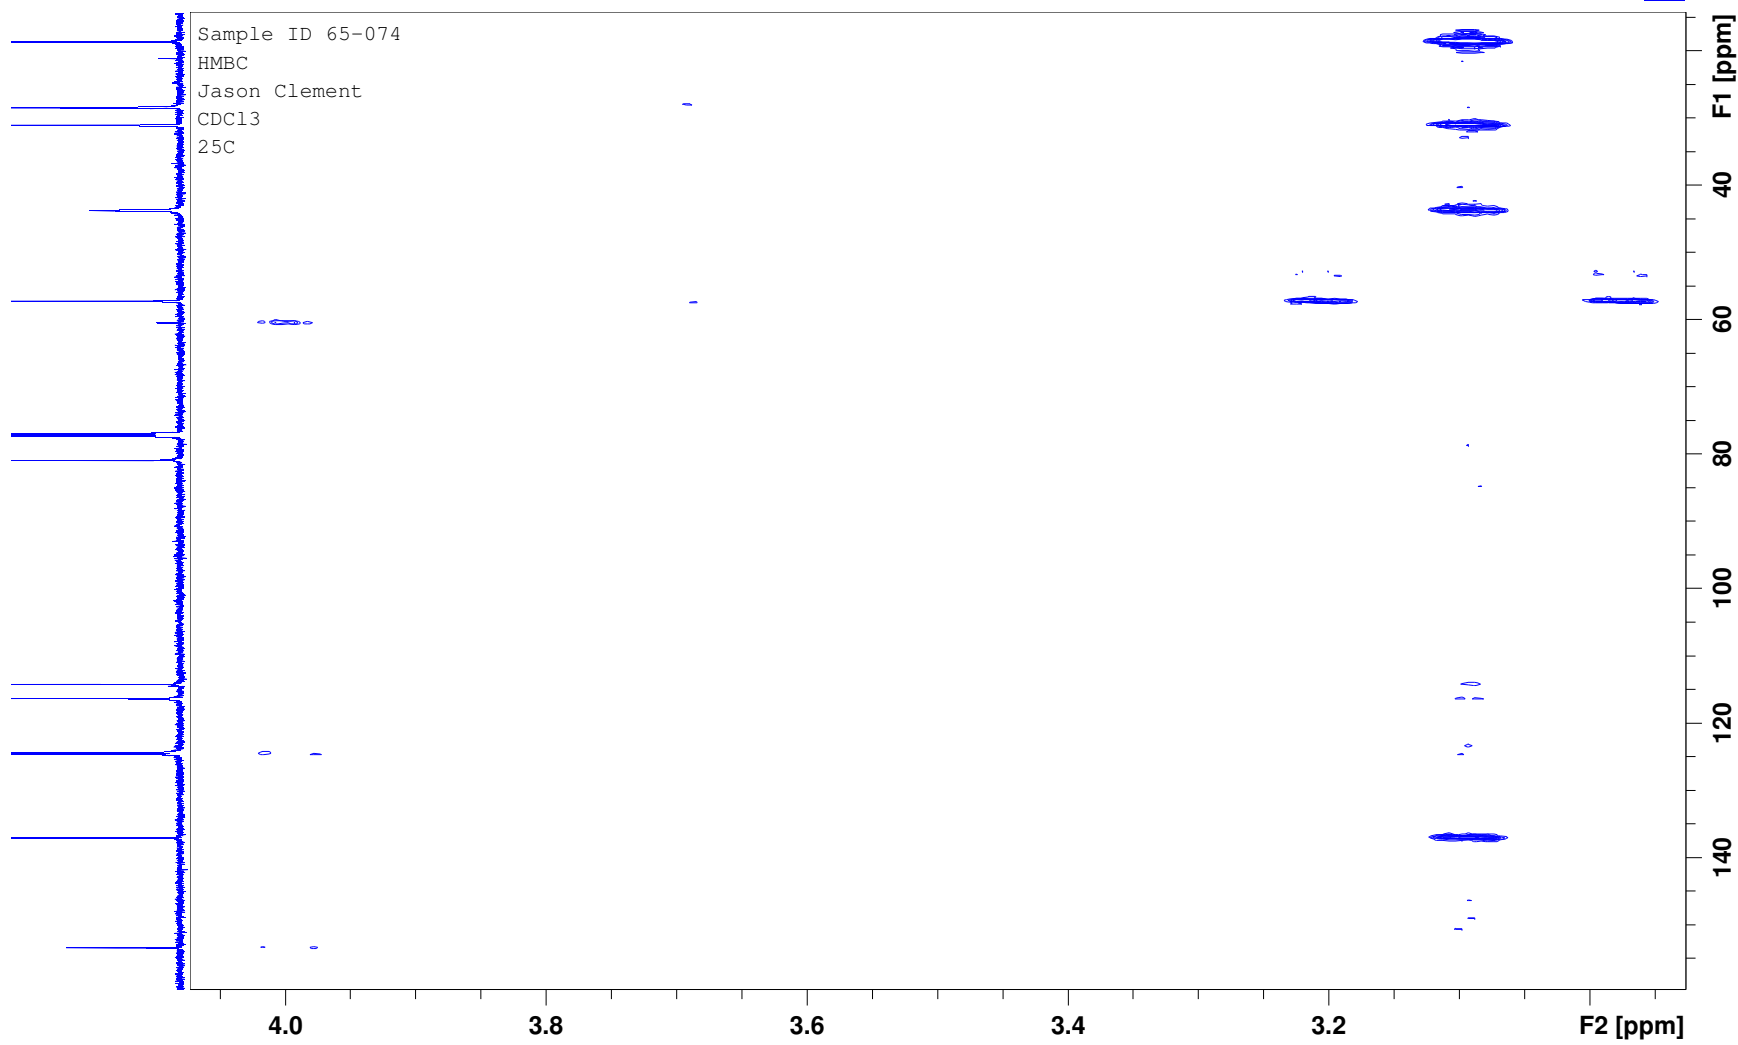

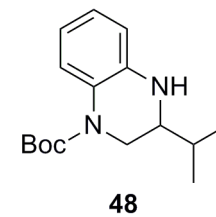

"Results sample ID 65-074" 7 1 C:\Users\Jason\Documents\BSBistuff\MedChem

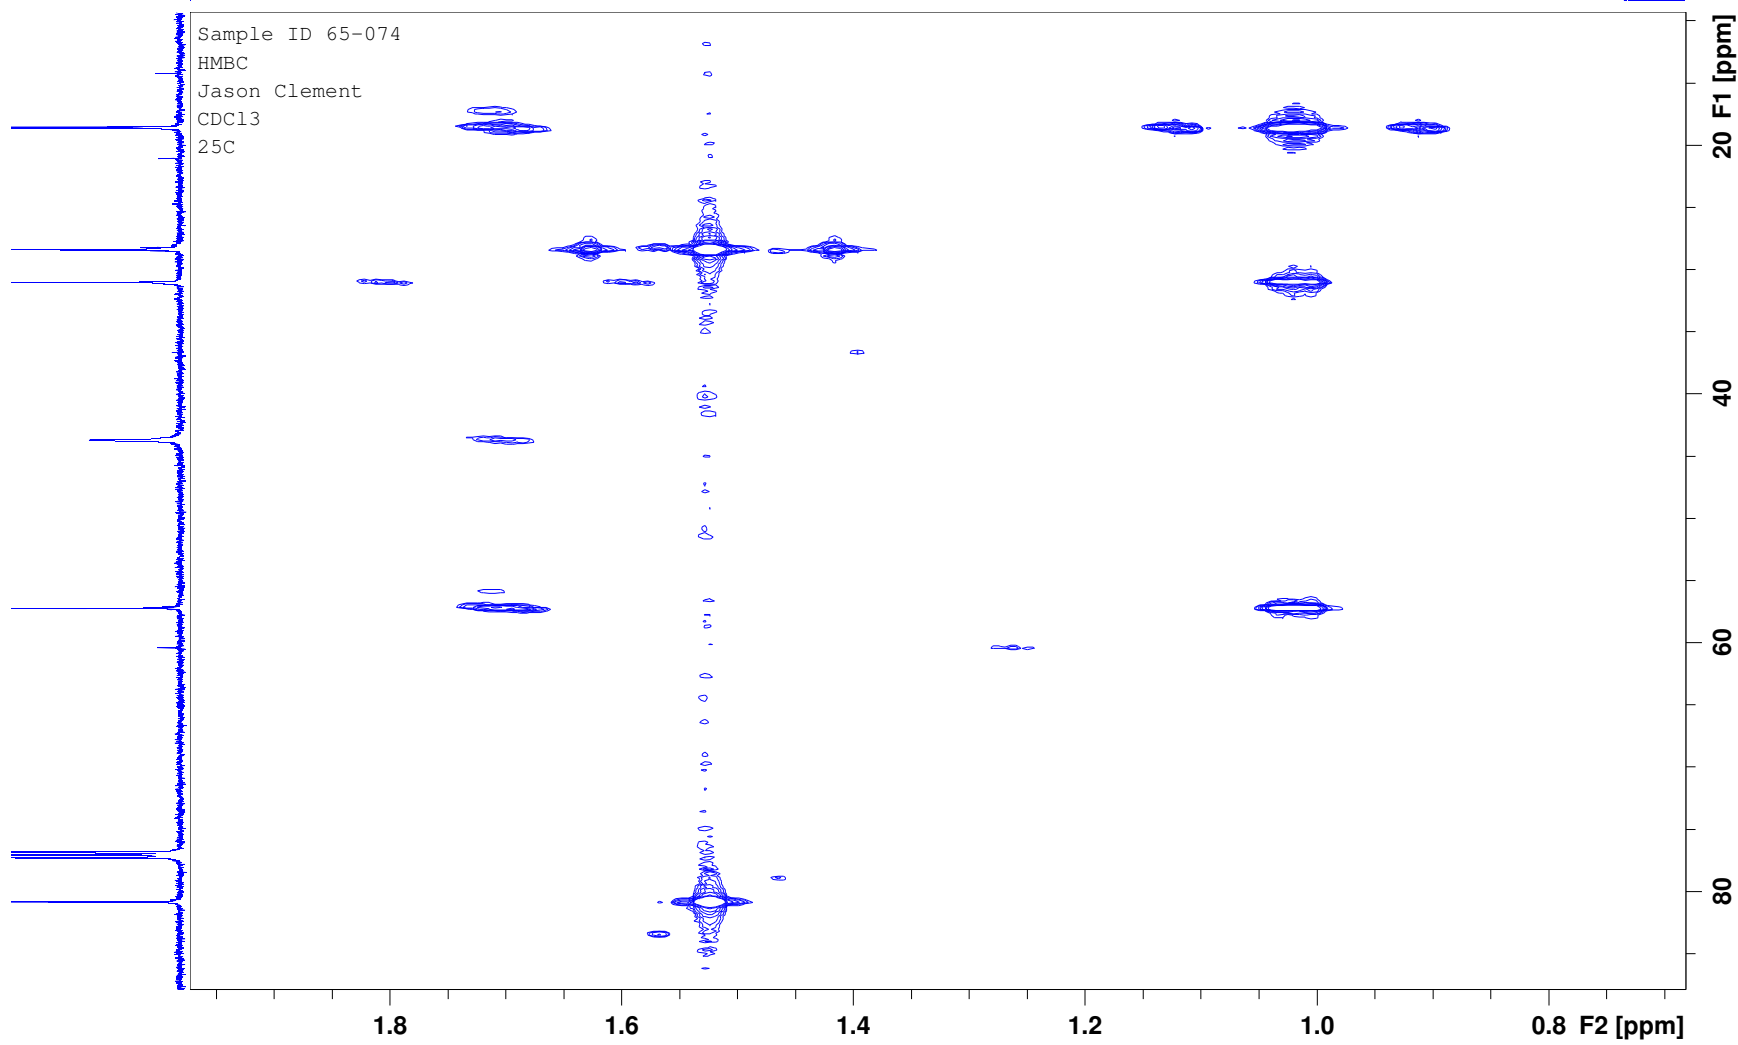

# NOESY Spectrum (CDCl<sub>3</sub>) of 48

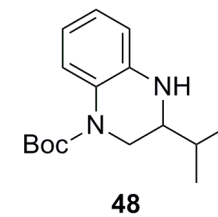

"Results sample ID 65-074" 9 1 C:\Users\Jason\Documents\BSBISstuff\MedChem

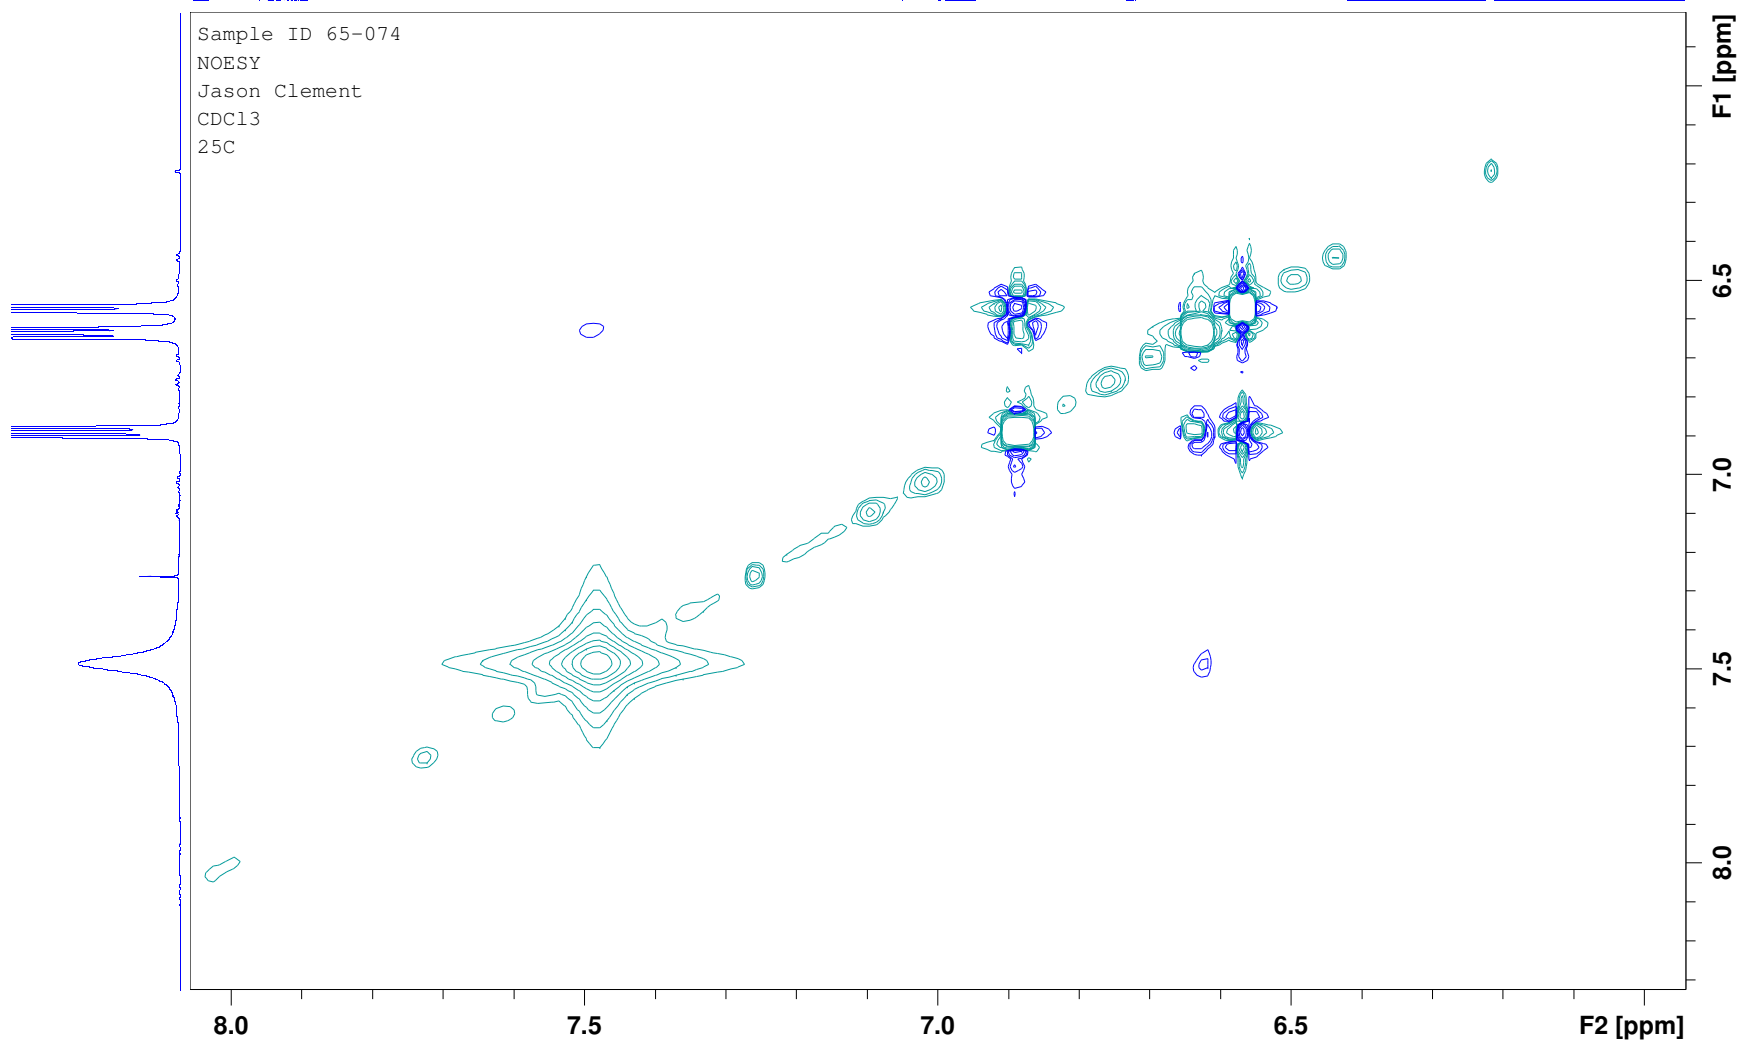

"Results sample ID 65-074" 9 1 C:\Users\Jason\Documents\BSBIstuff\MedChem

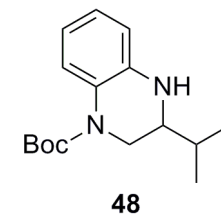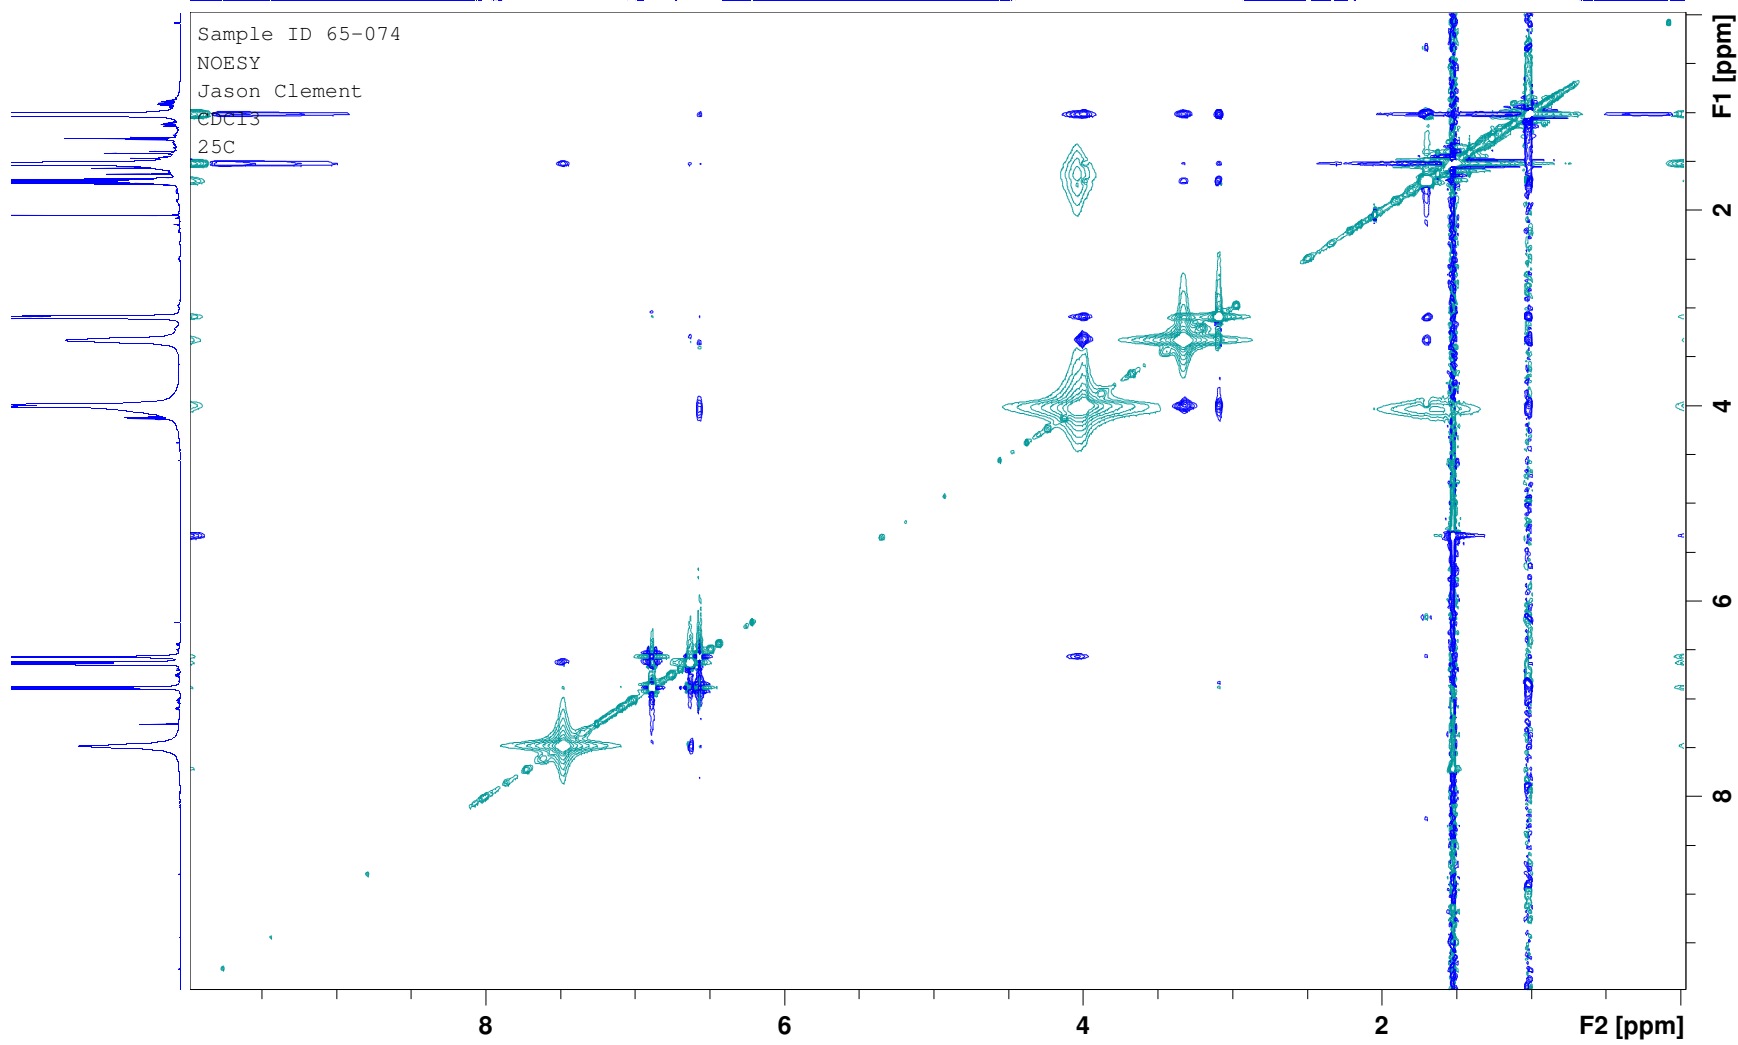



"Results sample ID 65-074" 9 1 C:\Users\Jason\Documents\BSBIstuff\MedChem

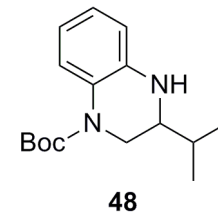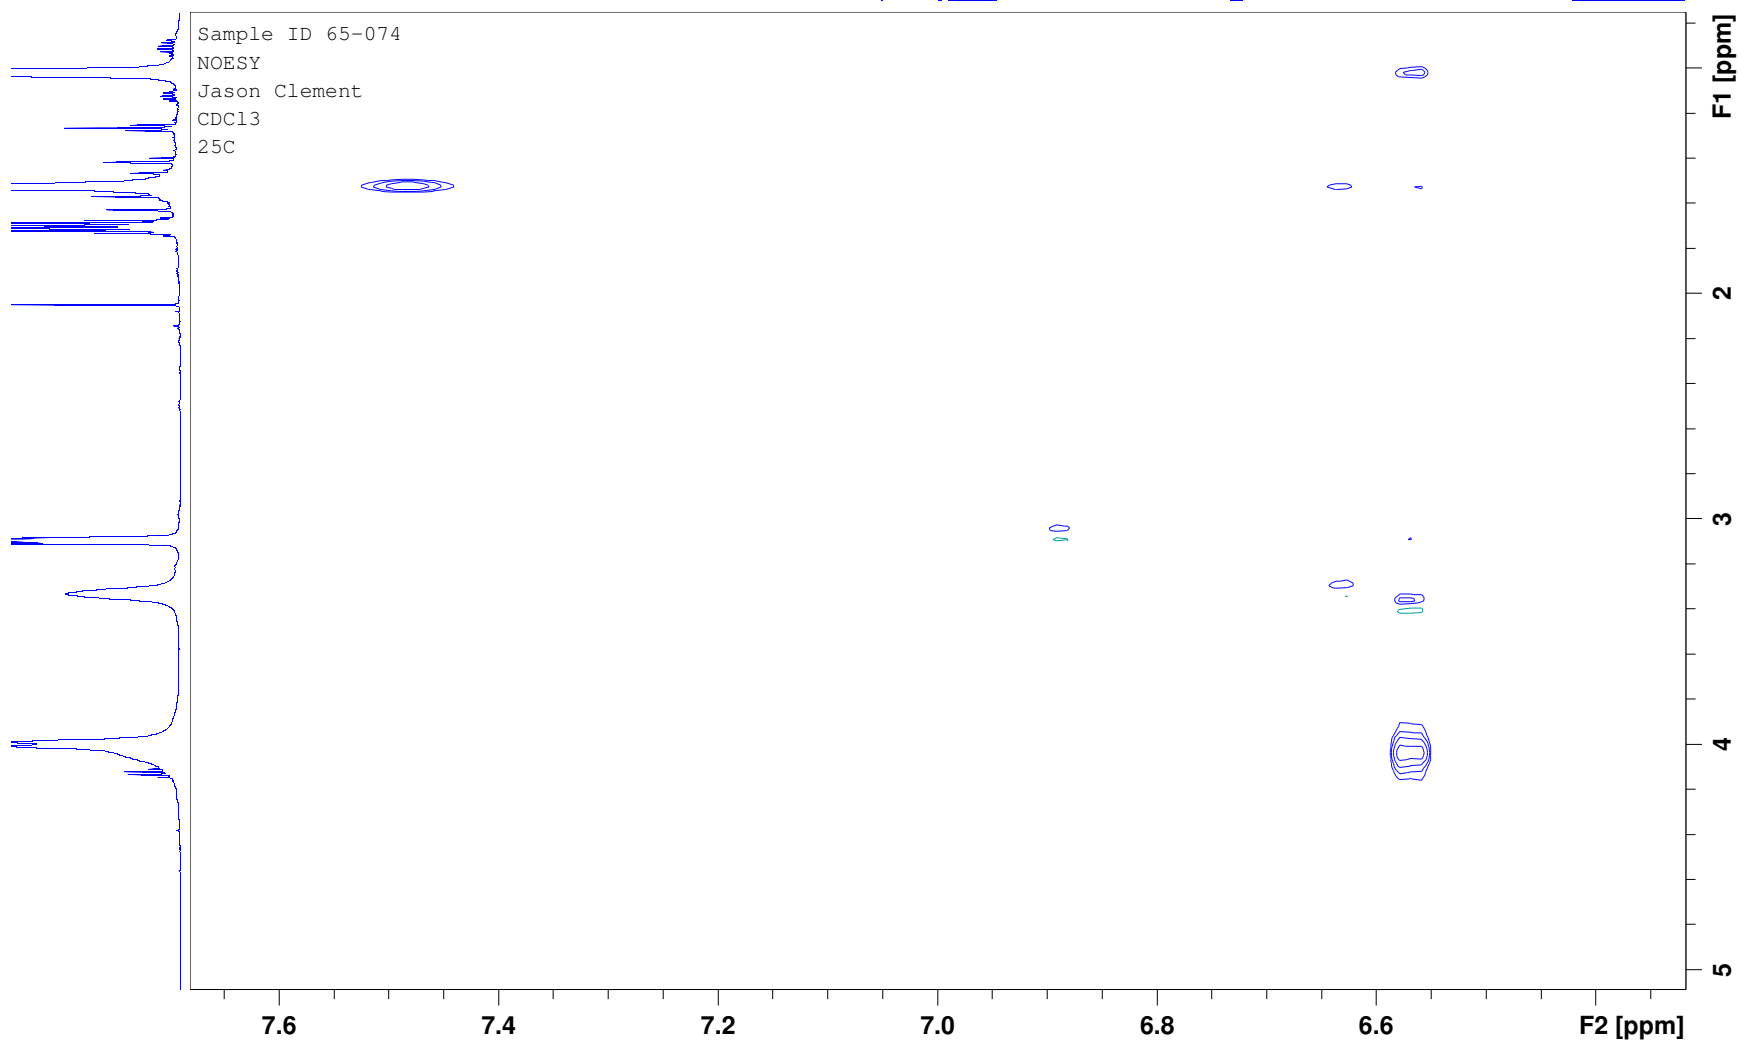

"Results sample ID 65-074 9 1 C:\Users\Jason\Documents\BSBIstuff\MedChem

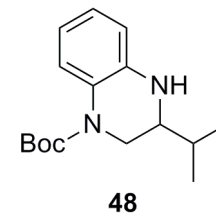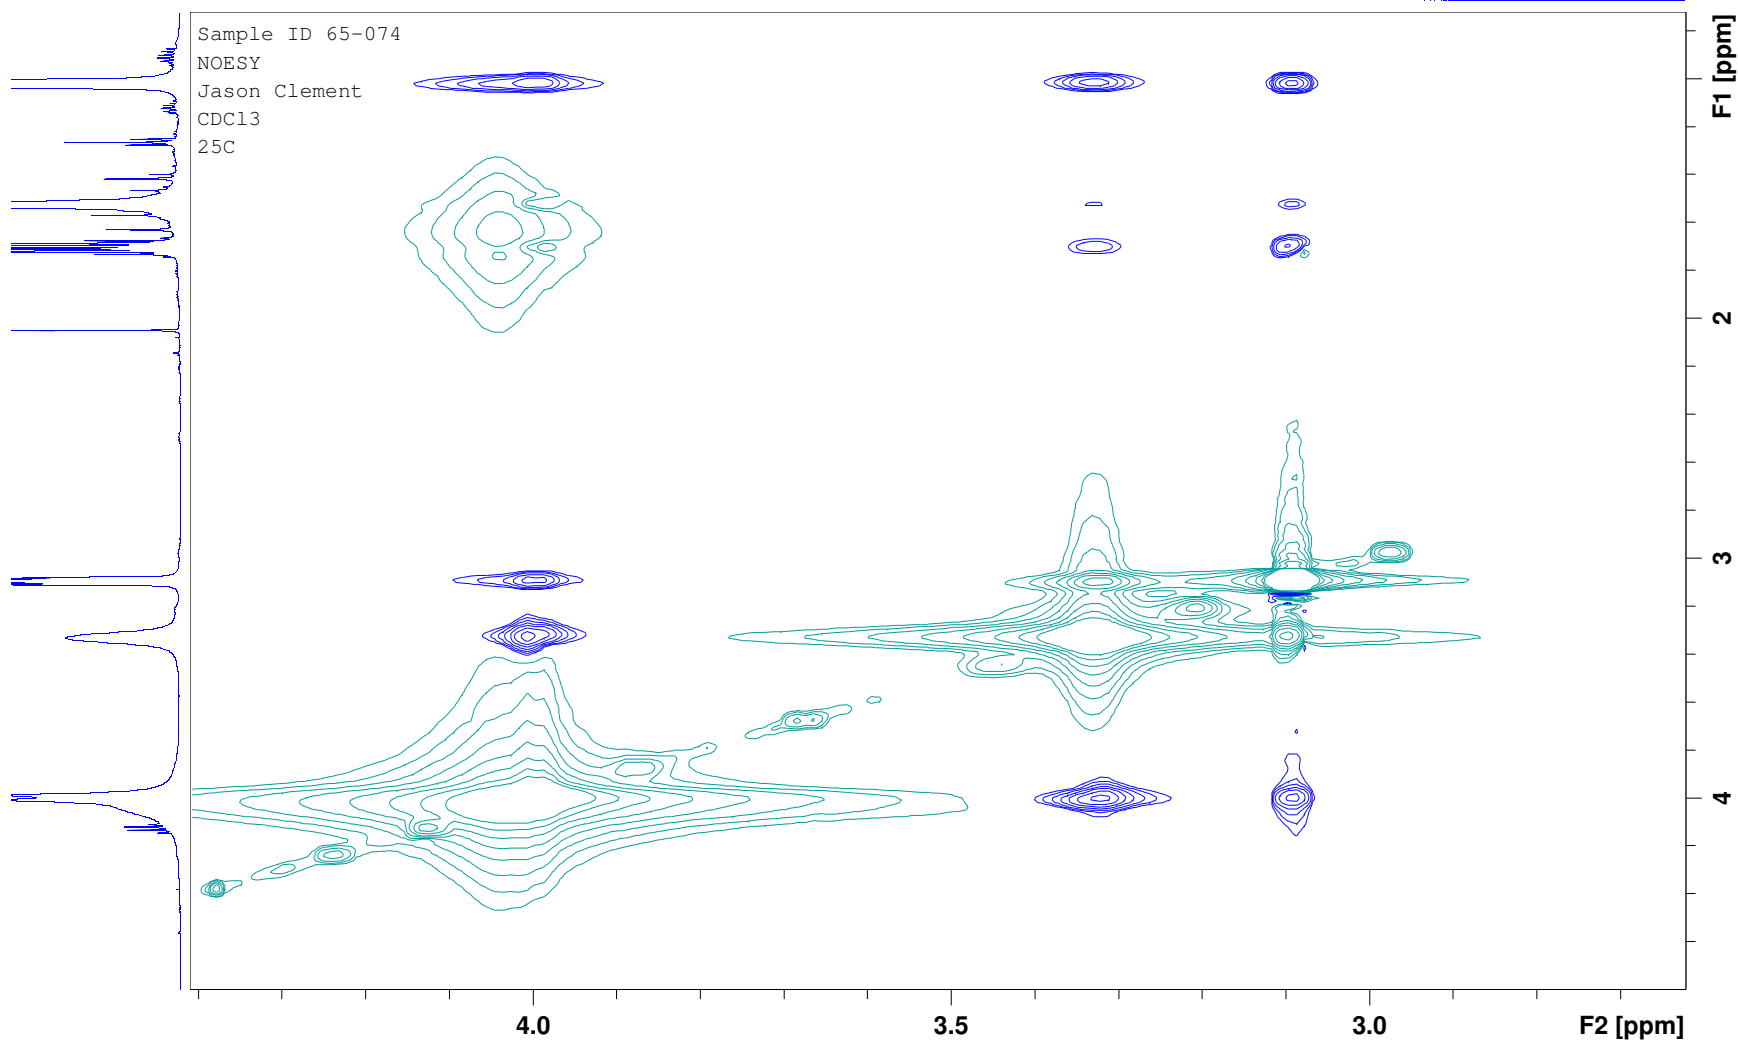

## LCMS analysis of 48

Current Chromatogram(s)



MS Spectrum



<sup>1</sup>H NMR Spectrum (300 MHz, CDCl<sub>3</sub>) of 61

STANDARD 1H OBSERVE

Archive directory: /export/home/fcwalkup/vnmrsys/data  
Sample directory: nh-53-83\_14Nov2016  
File: PROTON

Pulse Sequence: s2pu1  
Solvent: CD300  
Ambient temperature  
Mercury-300B6 "nmrsun"

Relax. delay 1.000 sec  
Pulse 45.0 degrees  
Acq. time 1.995 sec  
Width 4803.1 Hz  
32 repetitions  
OBSERVE H1, 299.9644067 MHz  
DATA PROCESSING  
FT size 32768  
Total time 1 min, 48 sec

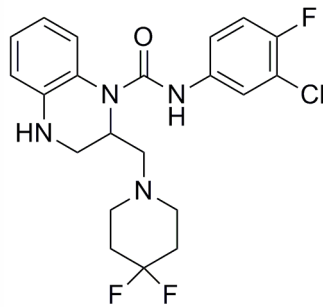

61

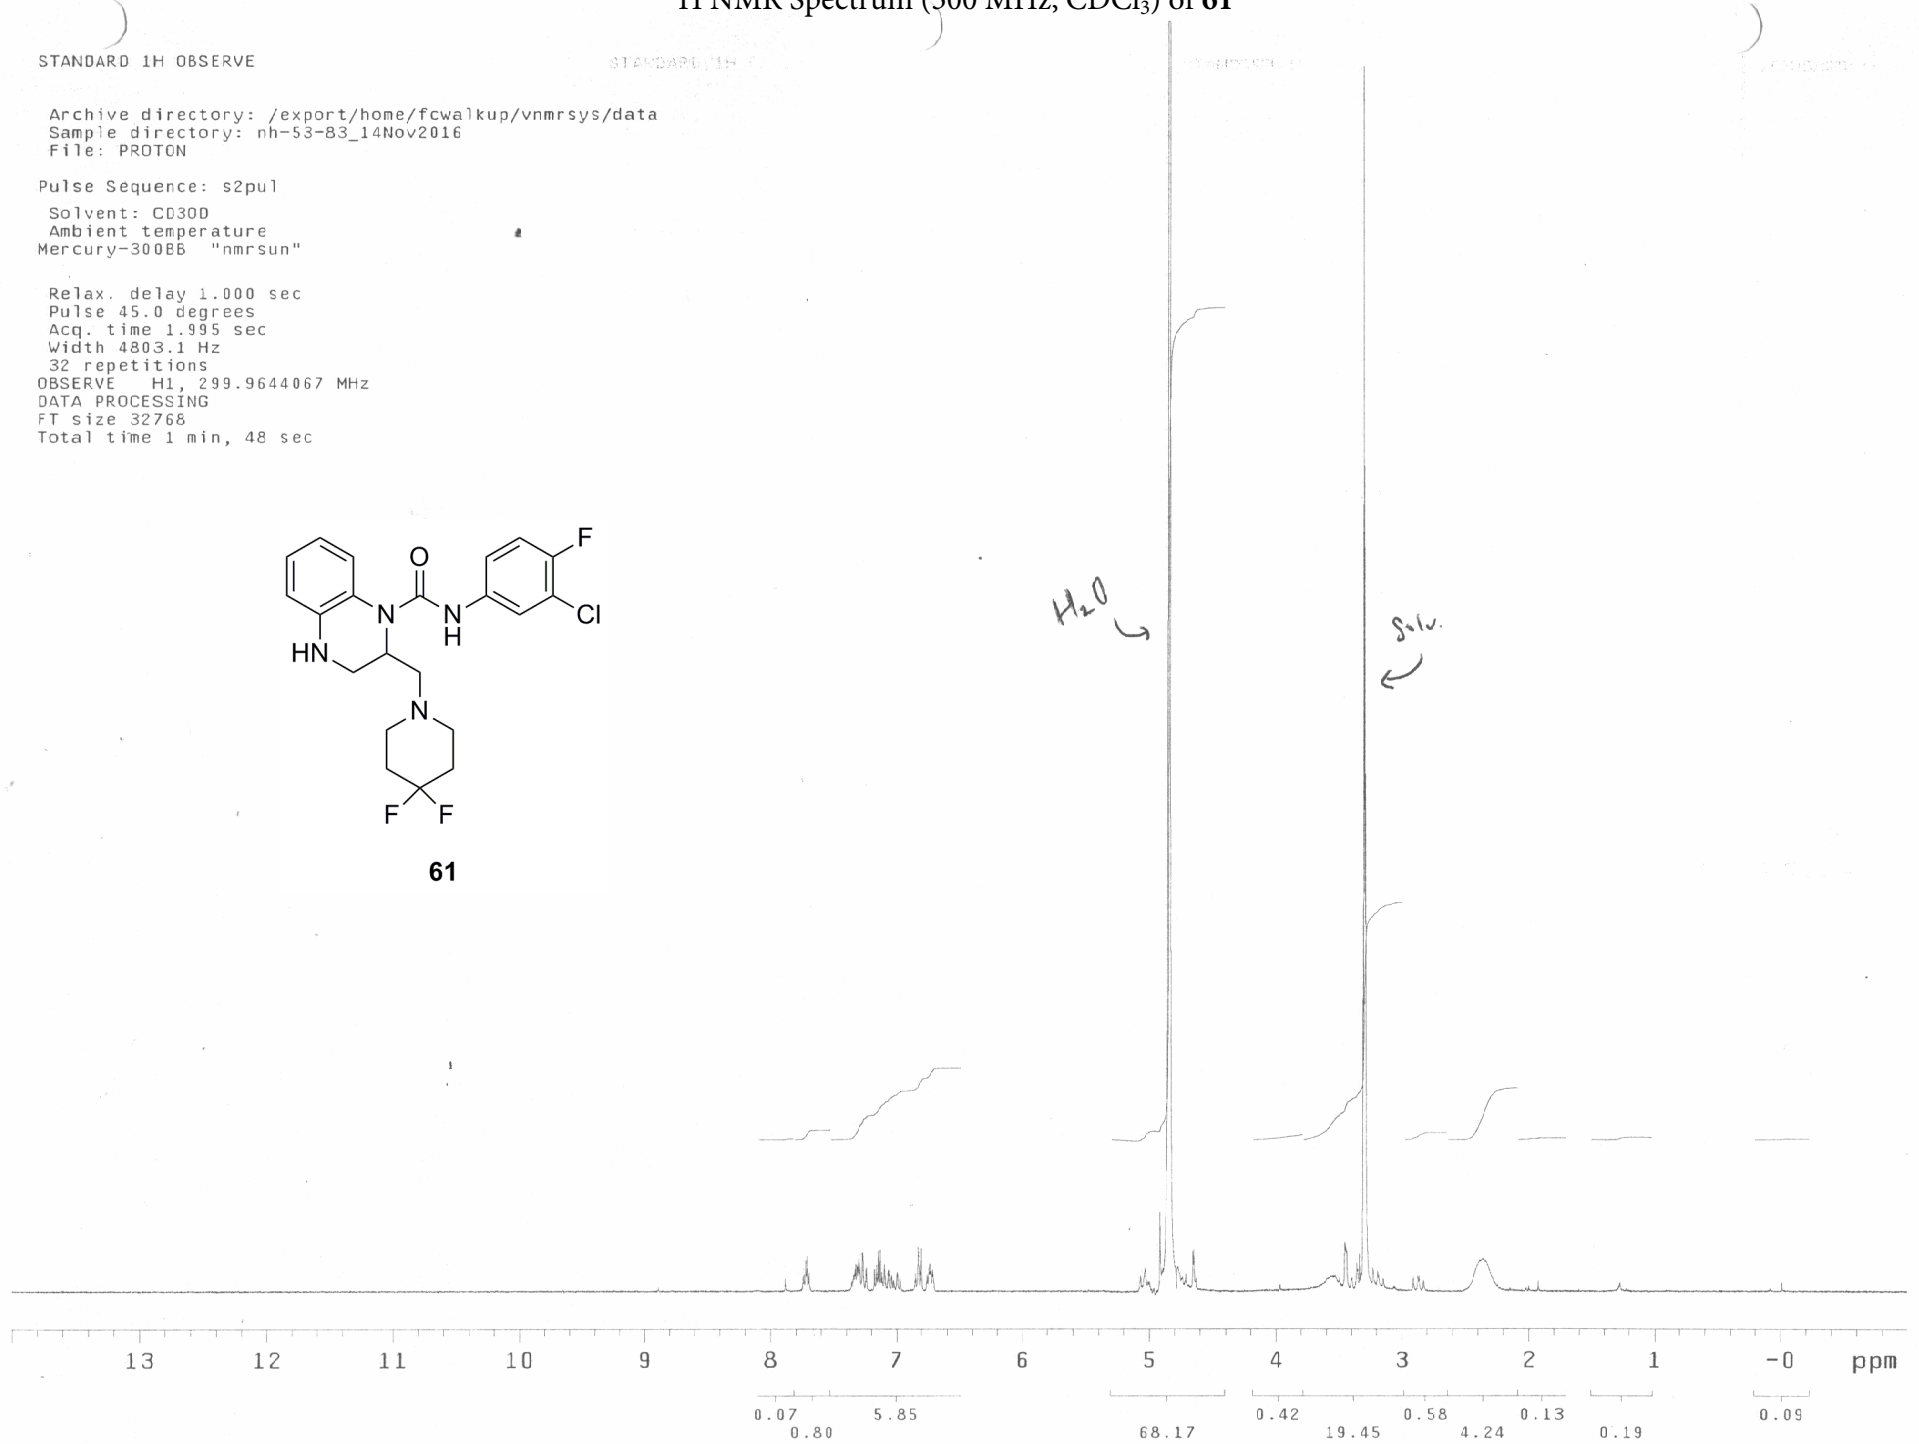

<sup>1</sup>H NMR Spectrum (300 MHz, CDCl<sub>3</sub>) of 61

STANDARD 1H OBSERVE

Archive directory: /export/home/fcwalkup/vnmrsys/data  
Sample directory: nh-53-83\_14Nov2016  
File: PROTON

Pulse Sequence: s2pul  
Solvent: CD3OD  
Ambient temperature  
Mercury-300B5 "nmrsun"

Relax. delay 1.000 sec  
Pulse 45.0 degrees  
Acq. time 1.995 sec  
Width 4803.1 Hz  
32 repetitions  
OBSERVE H1, 299.9644067 MHz  
DATA PROCESSING  
FT size 32768  
Total time 1 min, 48 sec

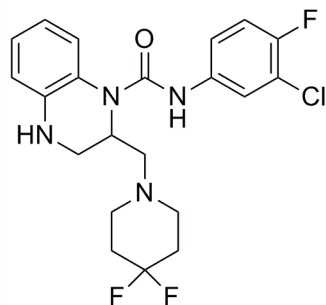

61

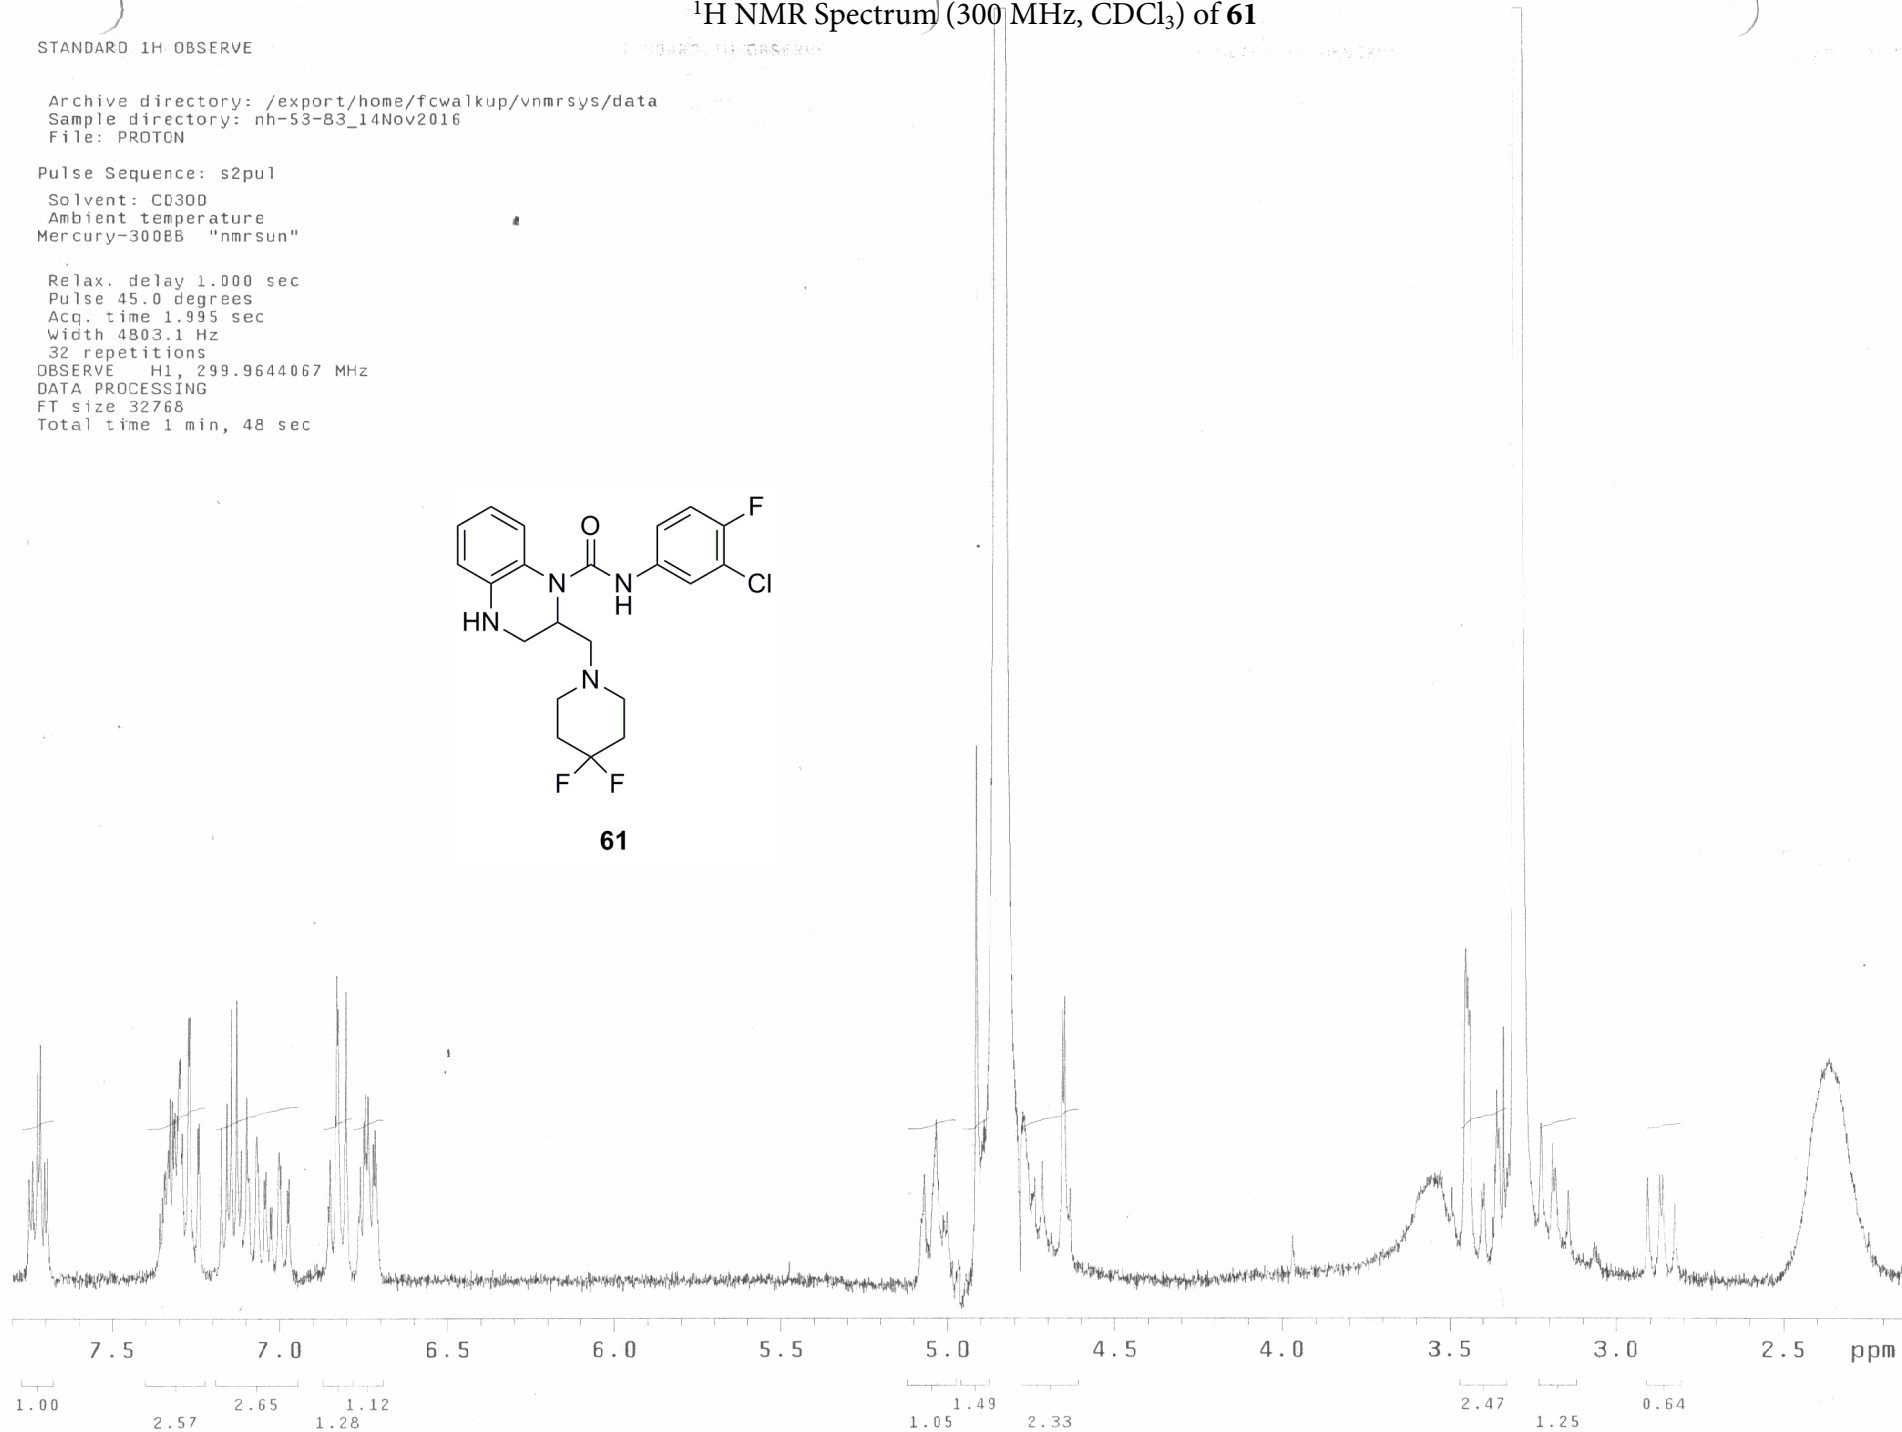

LCMS analysis of **61**

Current Chromatogram(s)

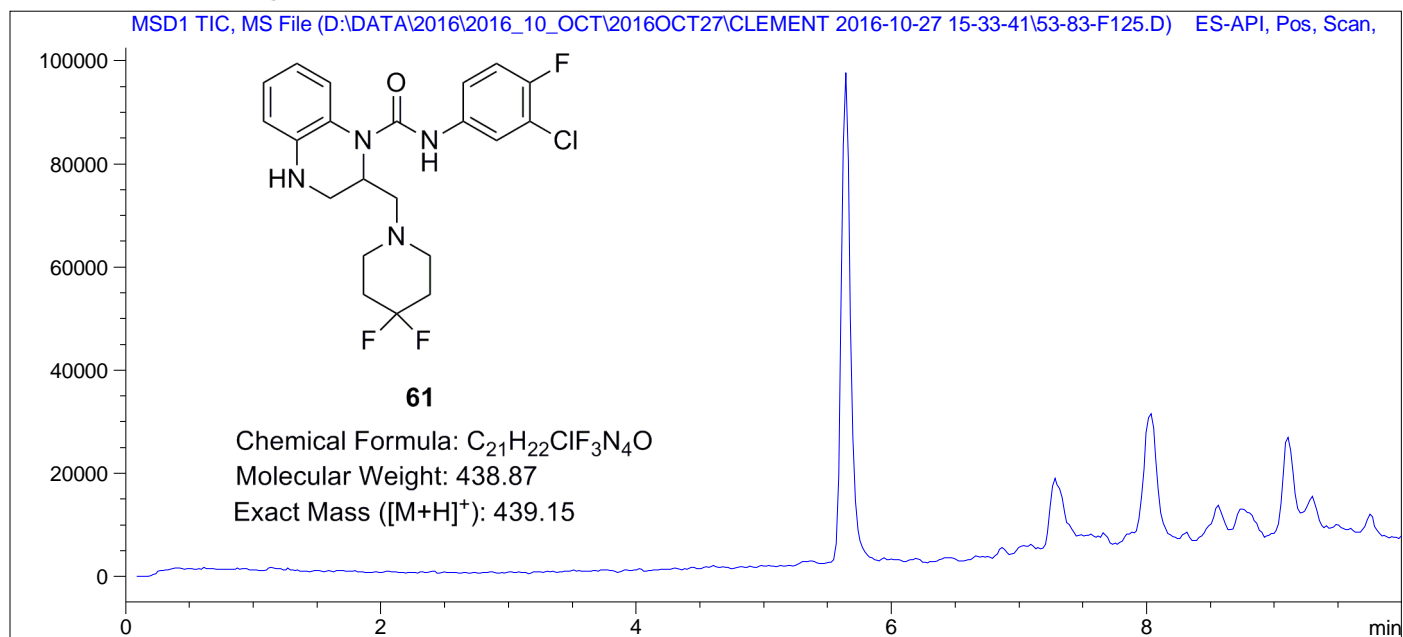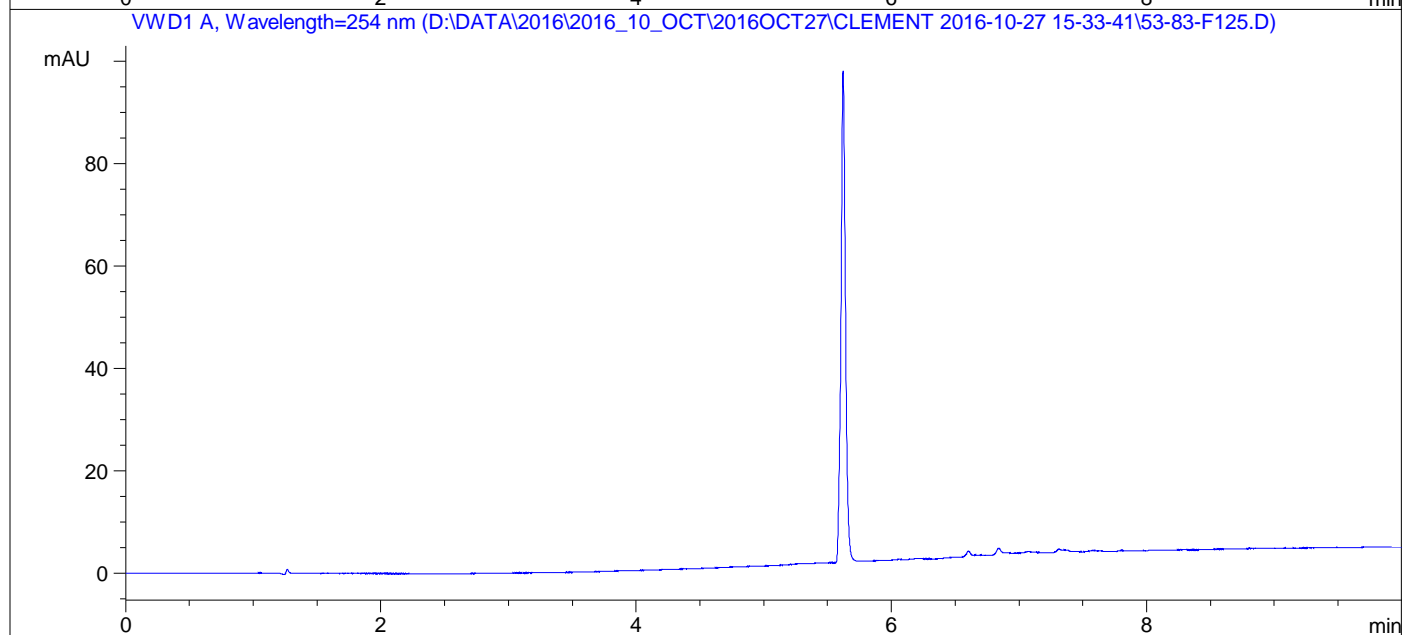

MS Spectrum

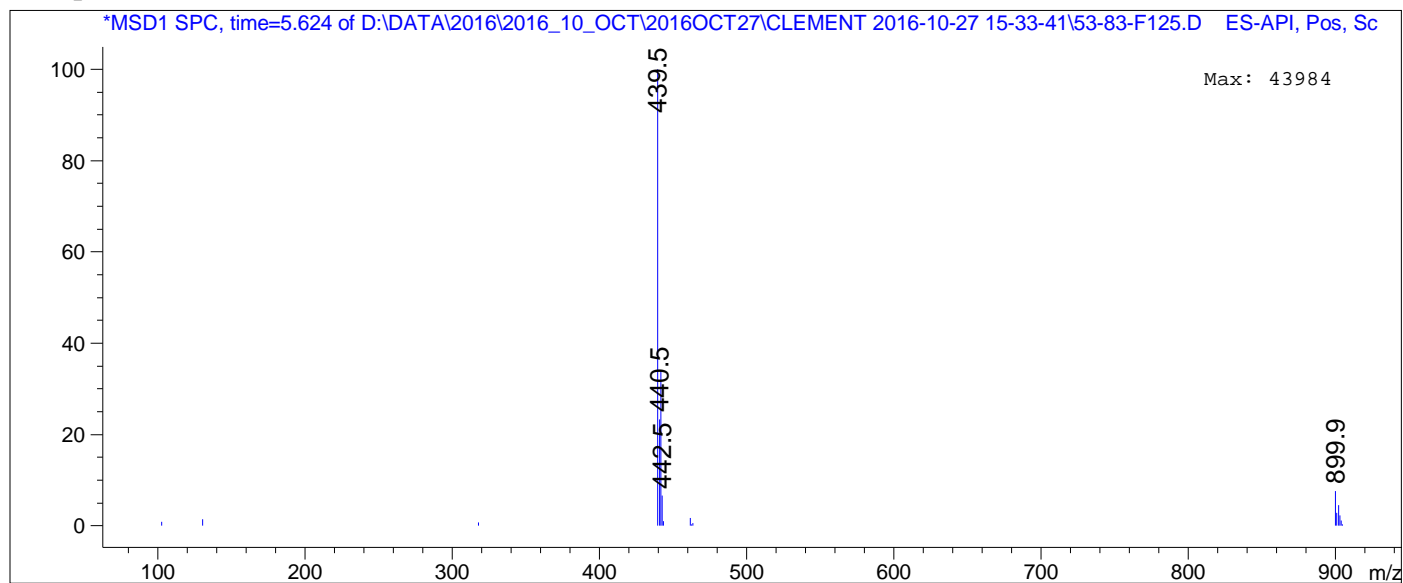

<sup>1</sup>H NMR Spectrum (400 MHz, CDCl<sub>3</sub>) of **88**

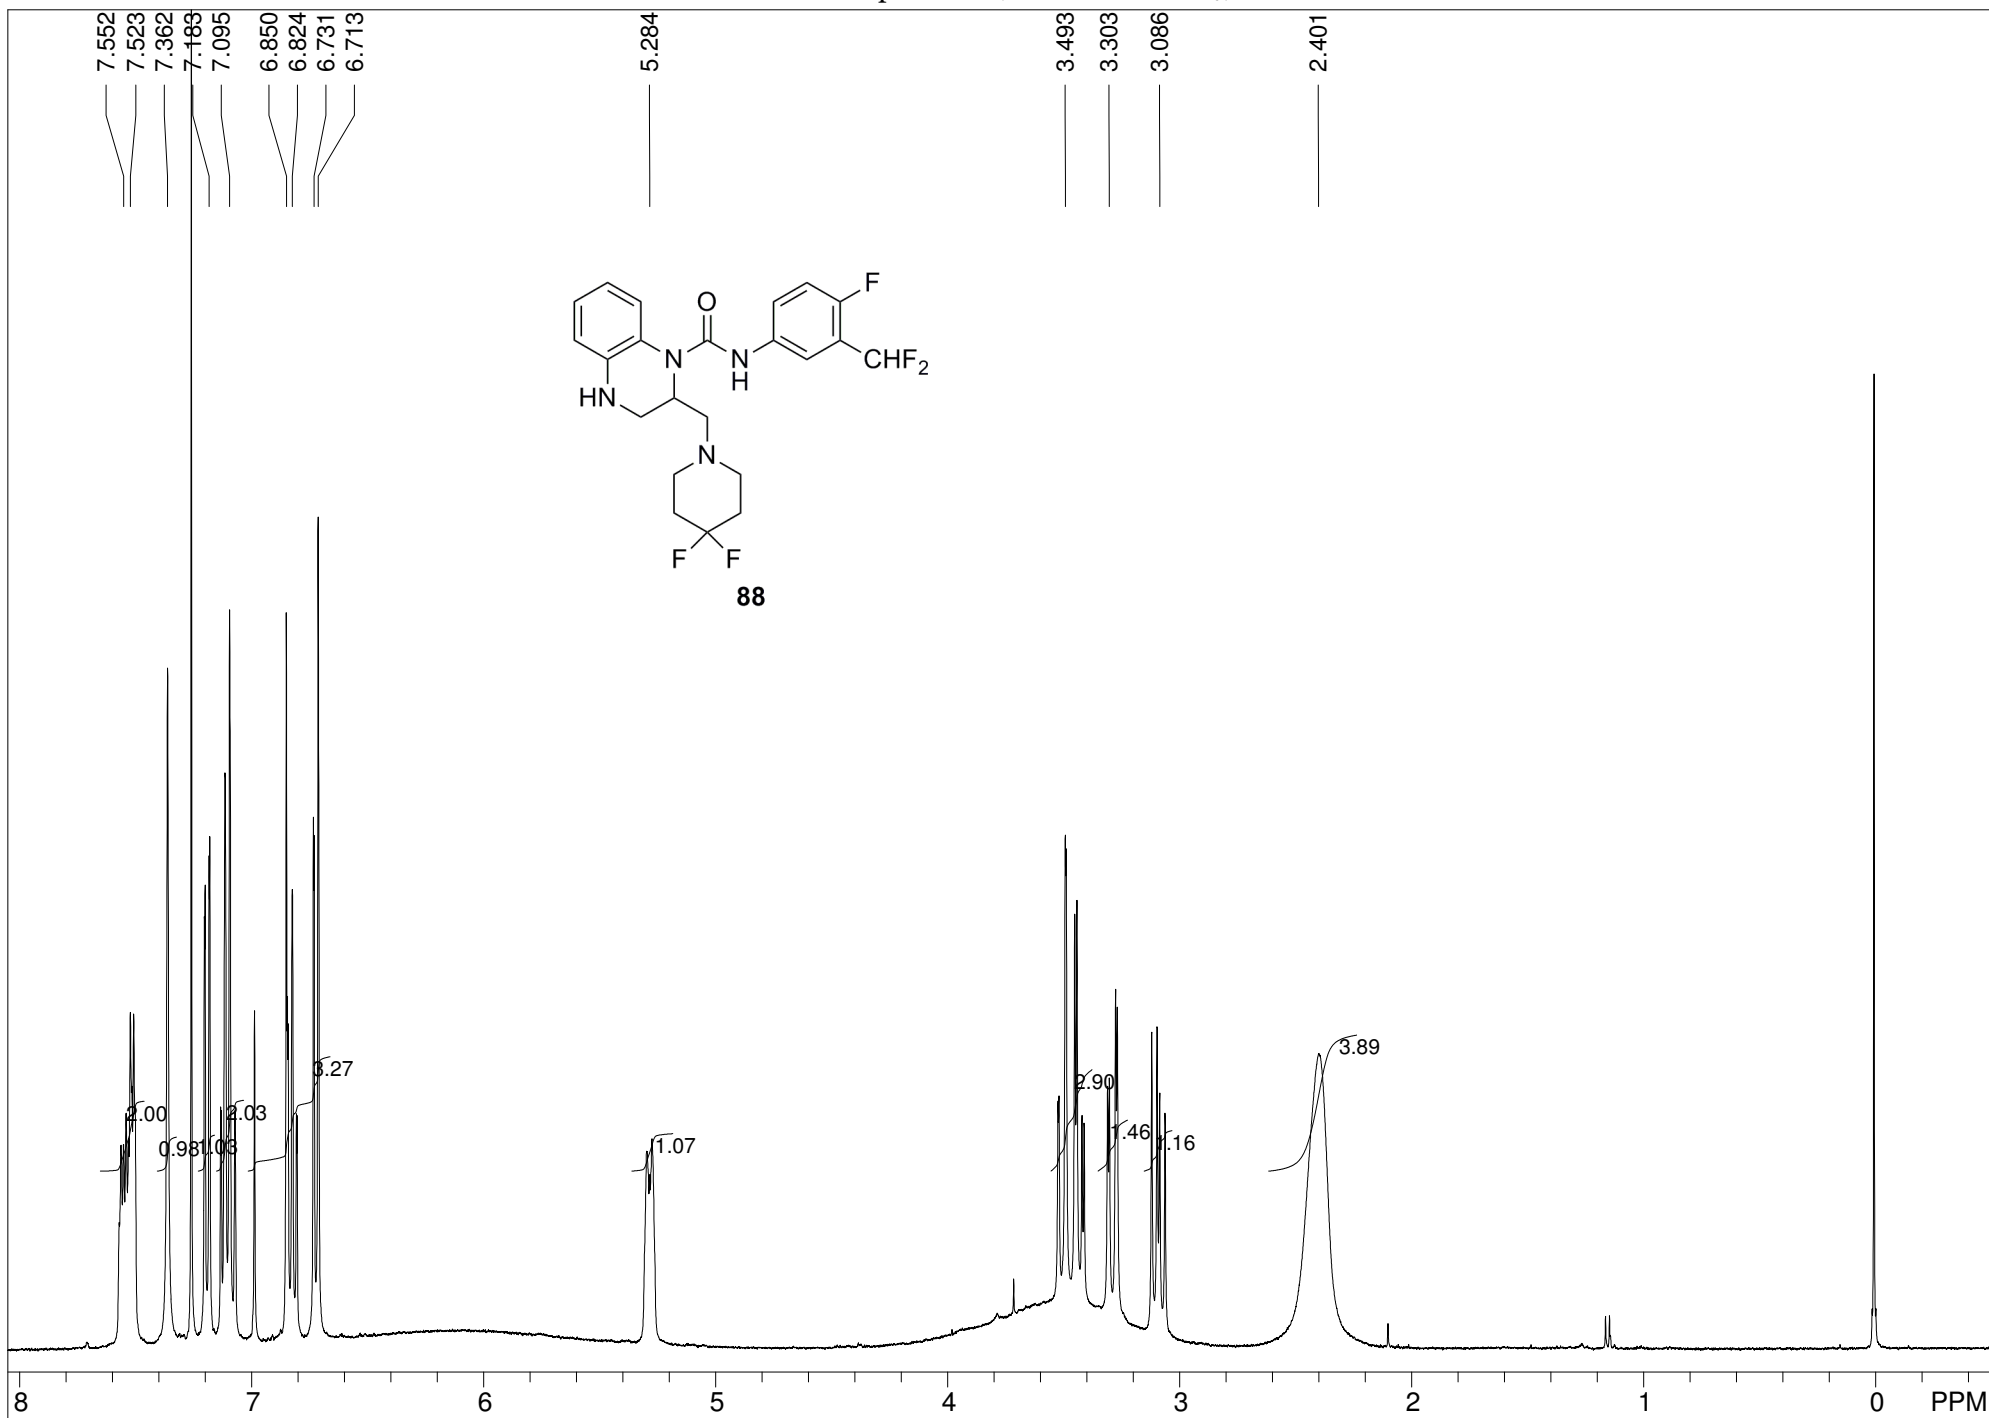

BSB1-65012-D 1

USER: qiuf -- DATE: Tue Oct 20 17:11:42 2020

F1: 400.133 F2: 400.133

SW1: 7211

OF1: 2794.5

PTS1d: 32734

EX: <zg30>

PW: 0.0 us

PD: ? sec

NA: 16

LB: 0.0

Nuts - \$BSB1-65012-D 1.dx

LCMS analysis of **88**

Current Chromatogram(s)

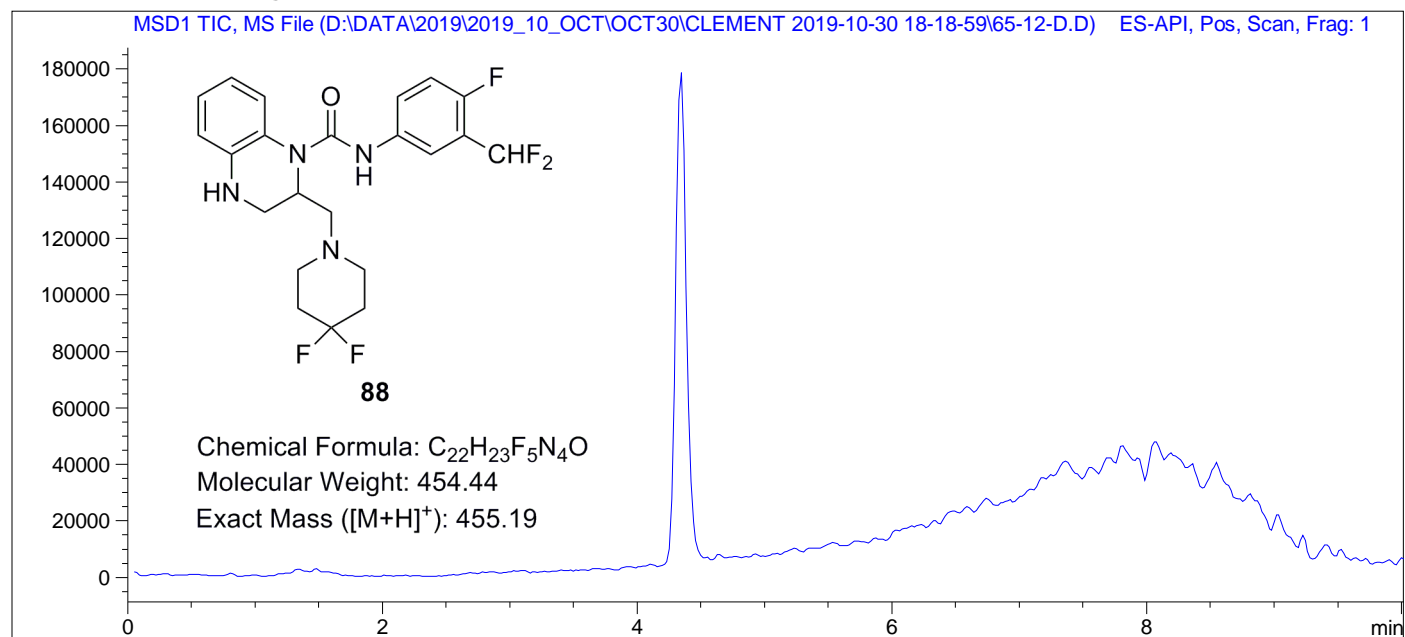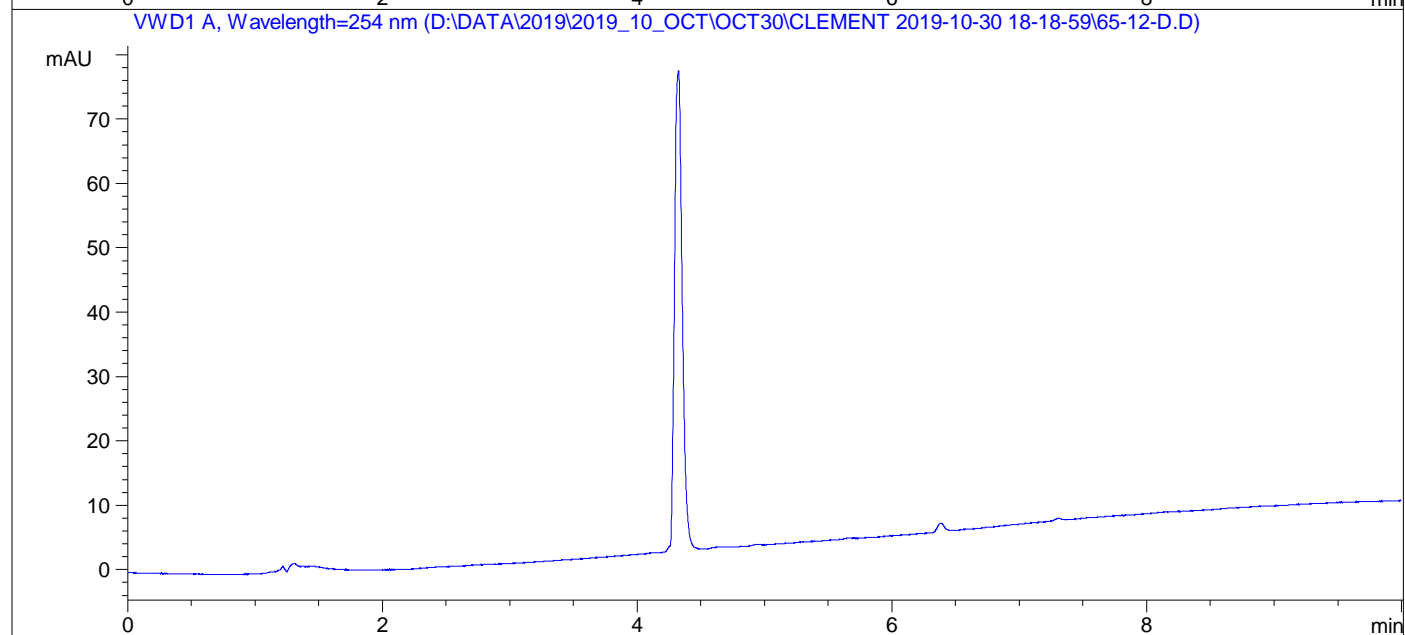

MS Spectrum

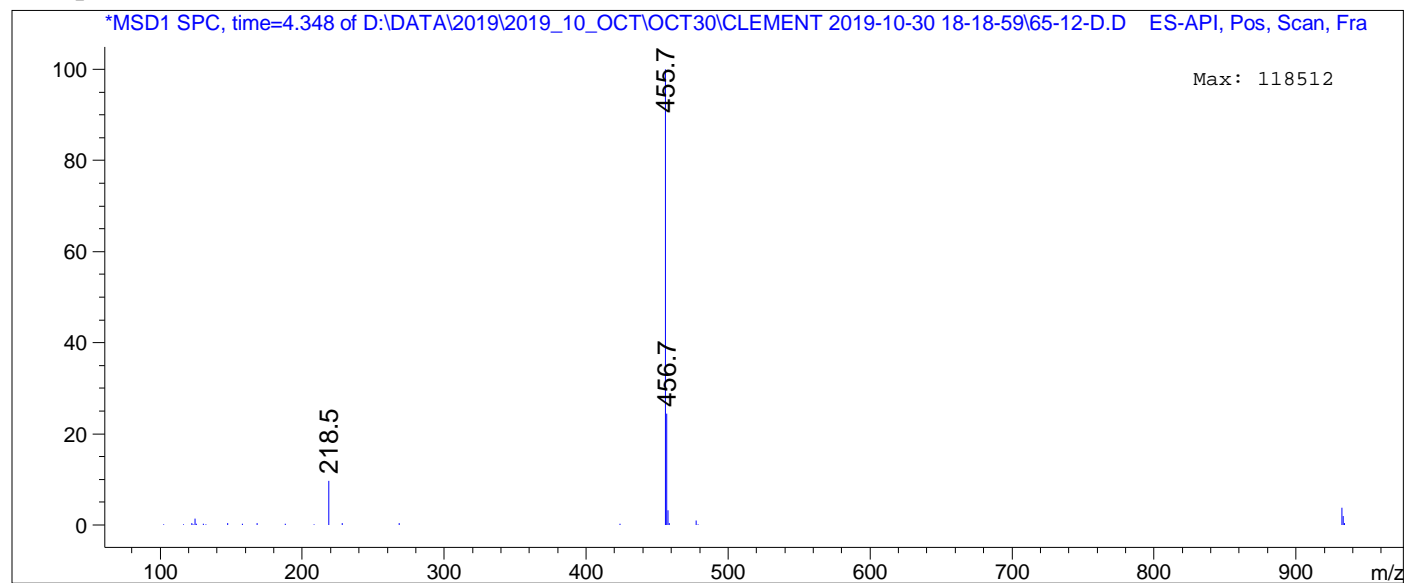



## Analysis Info

Analysis Name D:\Data\1022\NH - 2.B5B1-65012-D.d  
 Method 1019\_tune low.m  
 Sample Name 2.B5B1-65012-D  
 Comment direct infusion

Acquisition Date 10/22/2020 2:46:14 PM

Operator BDAL@DE  
 Instrument / Ser# micrOTOF II 8213750.1  
 0314

## Acquisition Parameter

|             |            |                      |          |                  |           |
|-------------|------------|----------------------|----------|------------------|-----------|
| Source Type | ESI        | Ion Polarity         | Positive | Set Nebulizer    | 0.4 Bar   |
| Focus       | Not active | Set Capillary        | 4500 V   | Set Dry Heater   | 180 °C    |
| Scan Begin  | 50 m/z     | Set End Plate Offset | -500 V   | Set Dry Gas      | 4.0 l/min |
| Scan End    | 1650 m/z   | n/a                  | n/a      | Set Divert Valve | Source    |

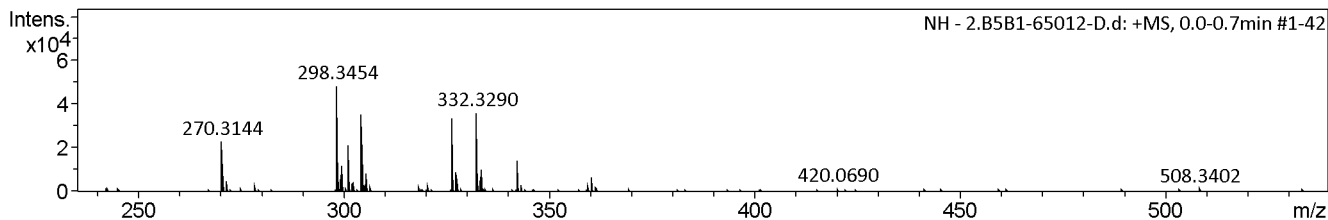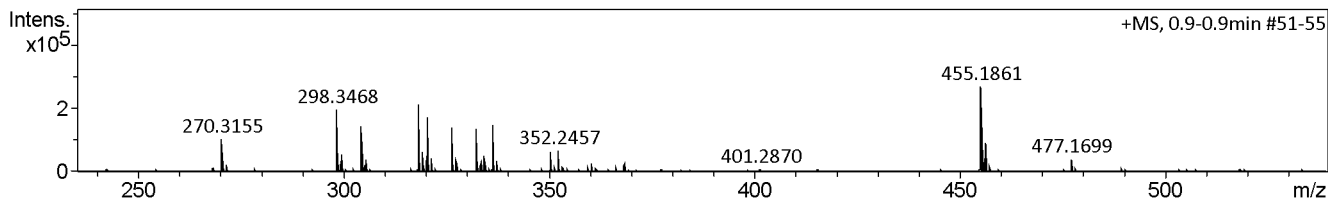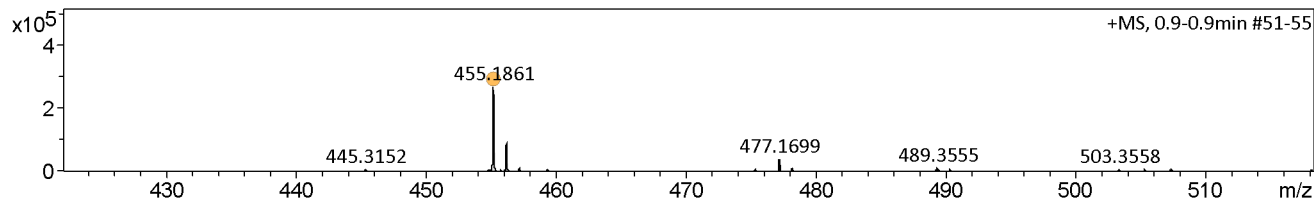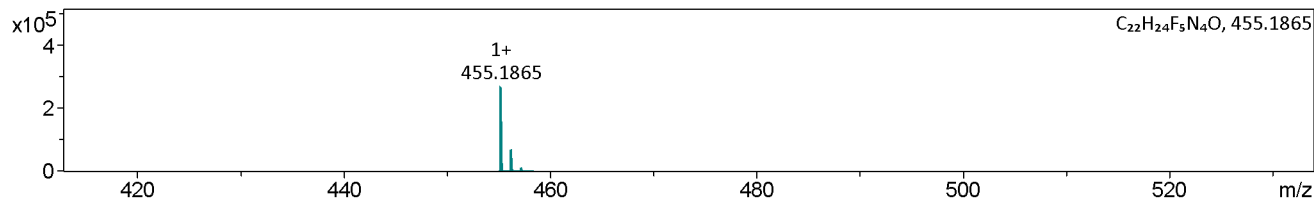

| Meas. m/z  | # | Ion Formula | m/z        | err [ppm] | Mean err [ppm] | rdb  | N-Rule | e <sup>-</sup> | Conf |
|------------|---|-------------|------------|-----------|----------------|------|--------|----------------|------|
| 455.186146 | 1 | C22H24F5N4O | 455.186479 | 0.7       | -0.7           | 10.5 | ok     | even           |      |

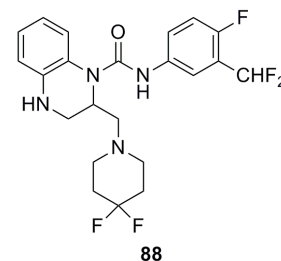

Chemical Formula: C<sub>22</sub>H<sub>23</sub>F<sub>5</sub>N<sub>4</sub>O  
 Molecular Weight: 454.44  
 Exact Mass ([M+H]<sup>+</sup>): 455.19

<sup>1</sup>H NMR Spectrum (300 MHz, CD<sub>3</sub>OD) of 95

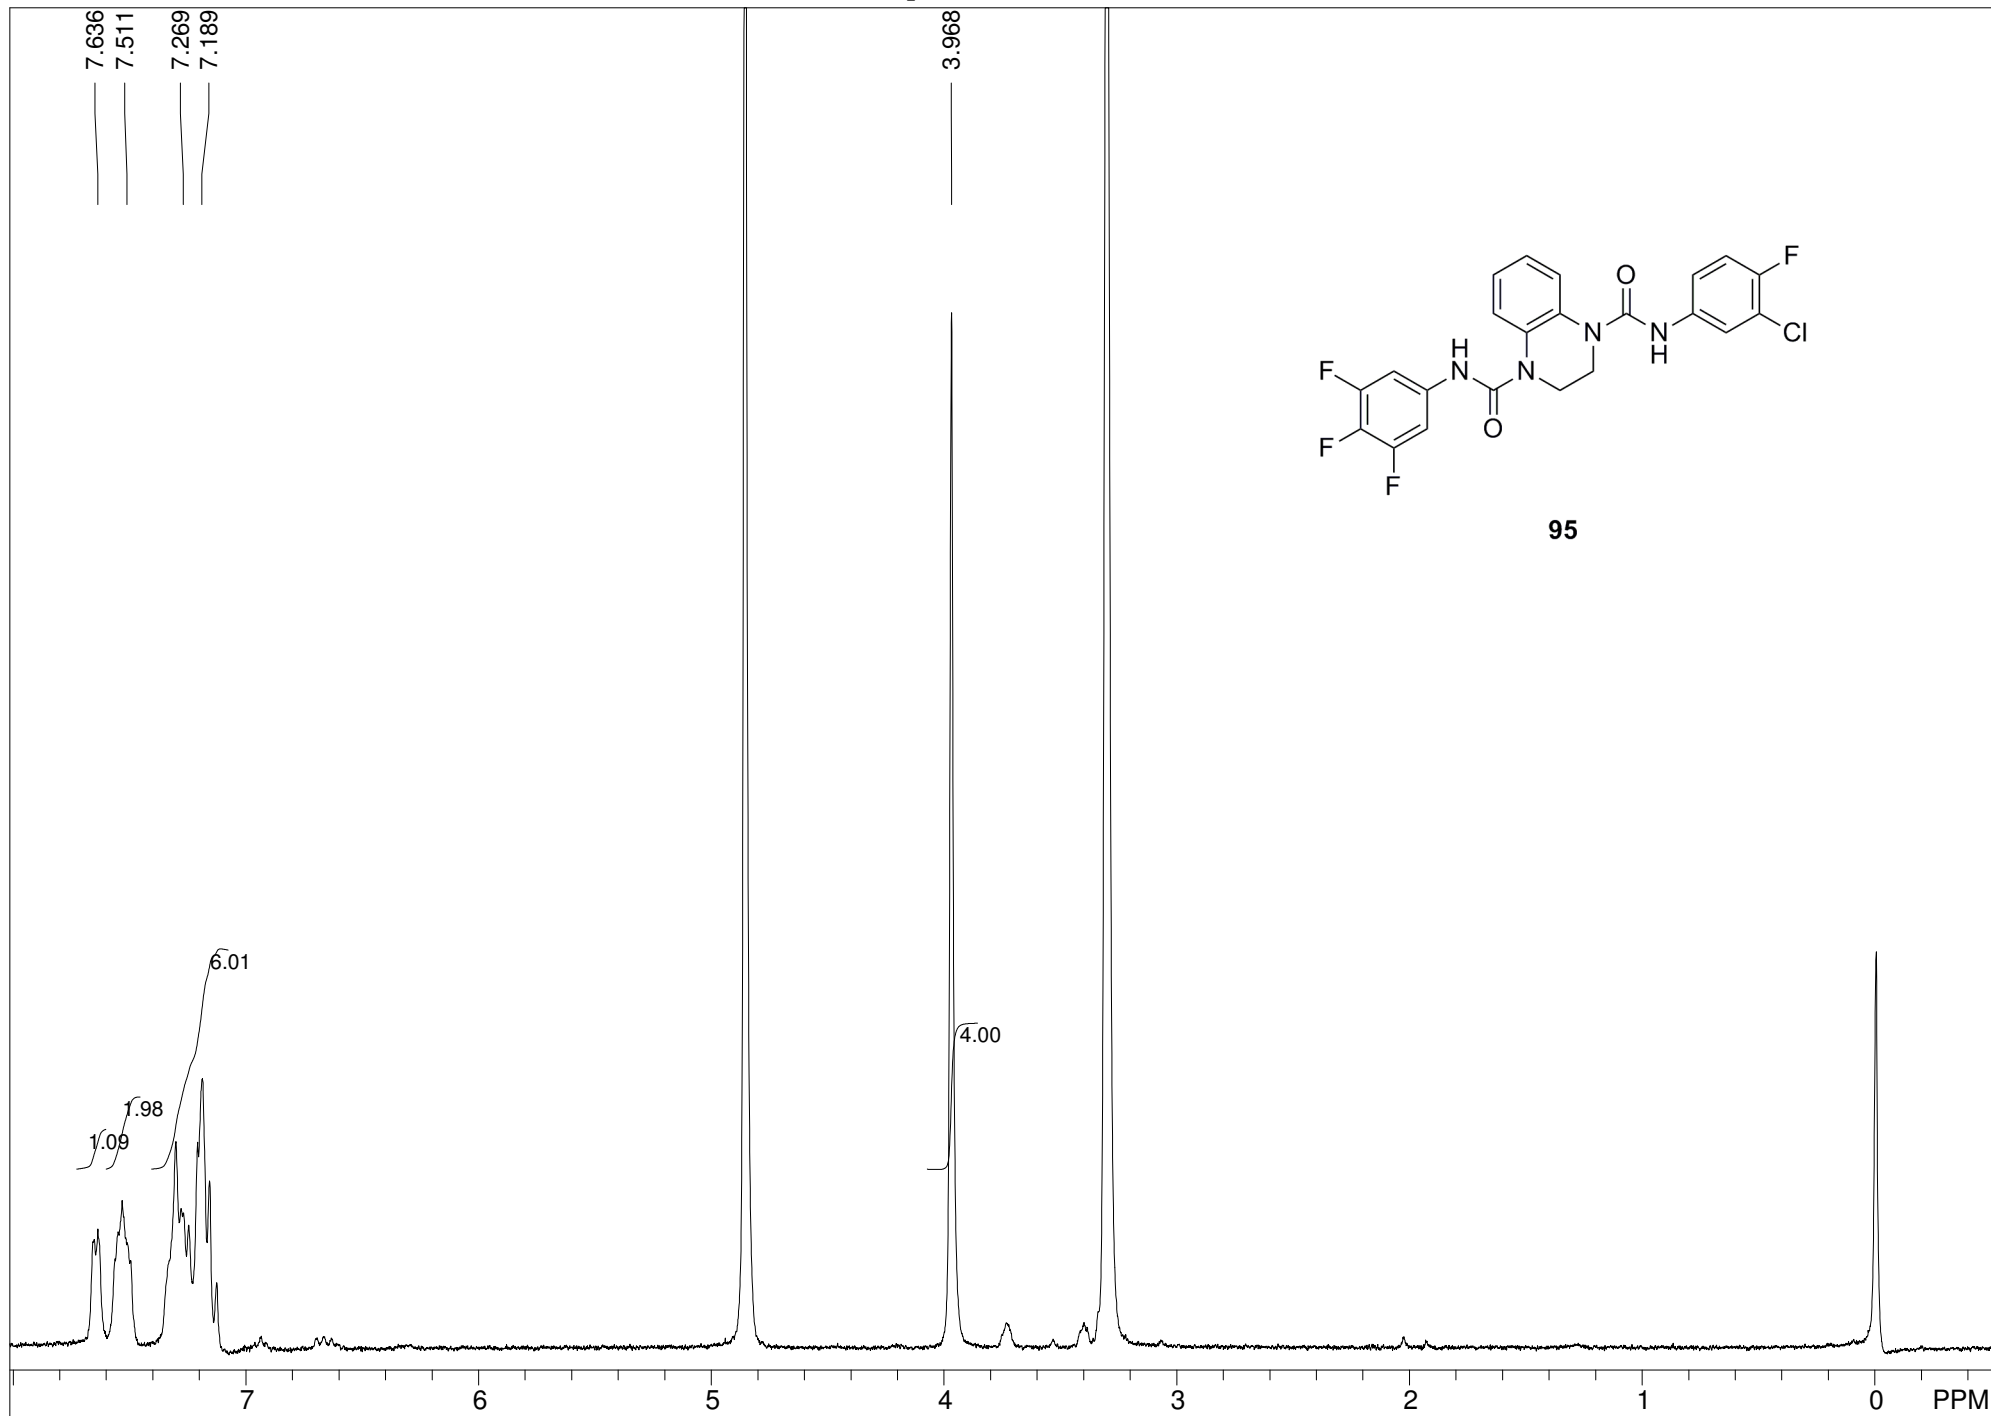

nh-58-91-a

USER: -- DATE: Dec 20 2017 11:25

F1: 299.965

F2: 75.433

SW1: 4799

OF1: 1799.9

PTS1d: 8192 , 16384

EX: s2pul

PW: 6.8 us, 45deg

PD: 1.0 sec

NA: 64

LB: 0.3

Nuts - \$nh-58-91-a PROTON 01.fid

### LCMS analysis of 95

Current Chromatogram(s)

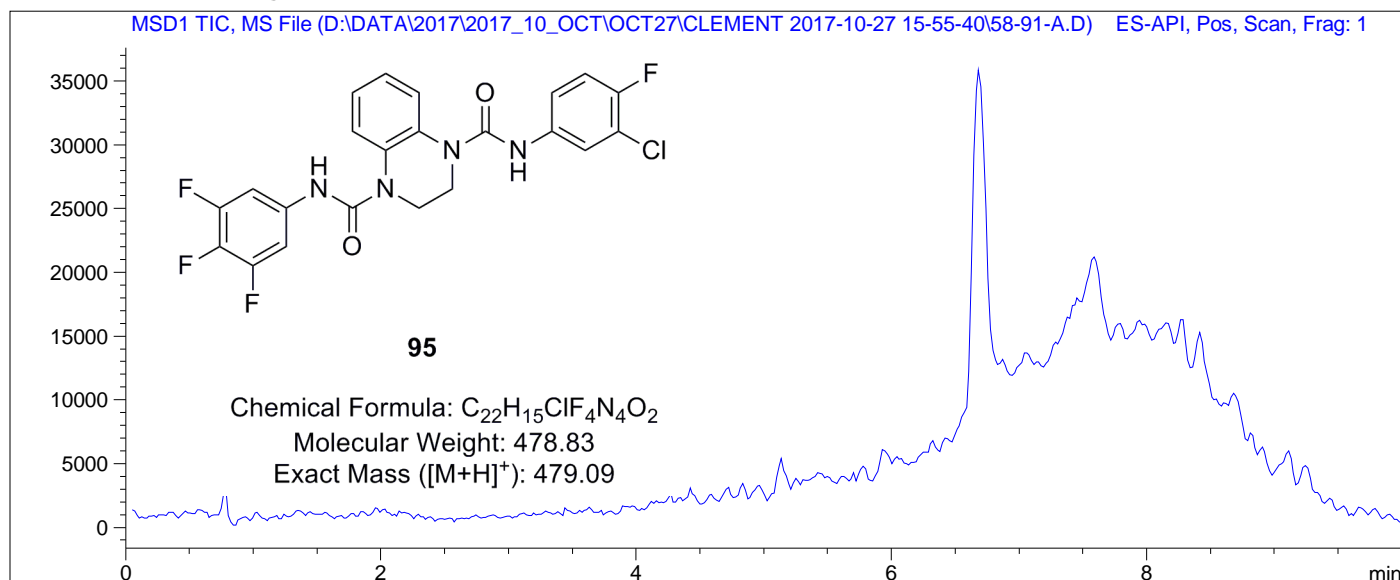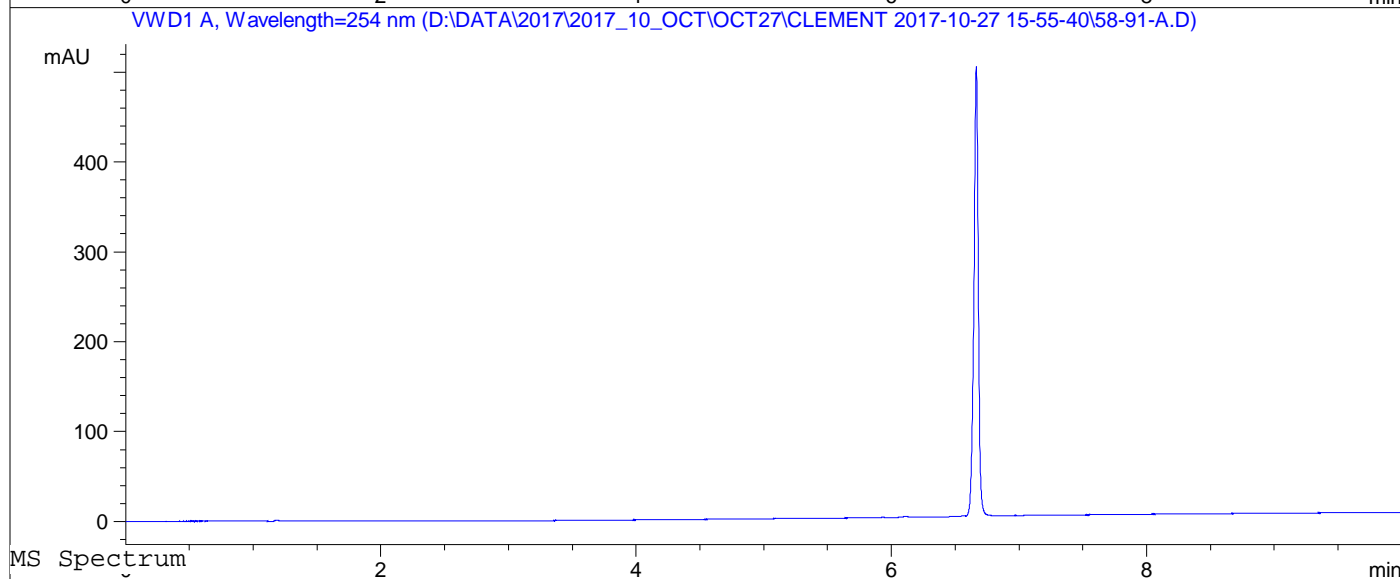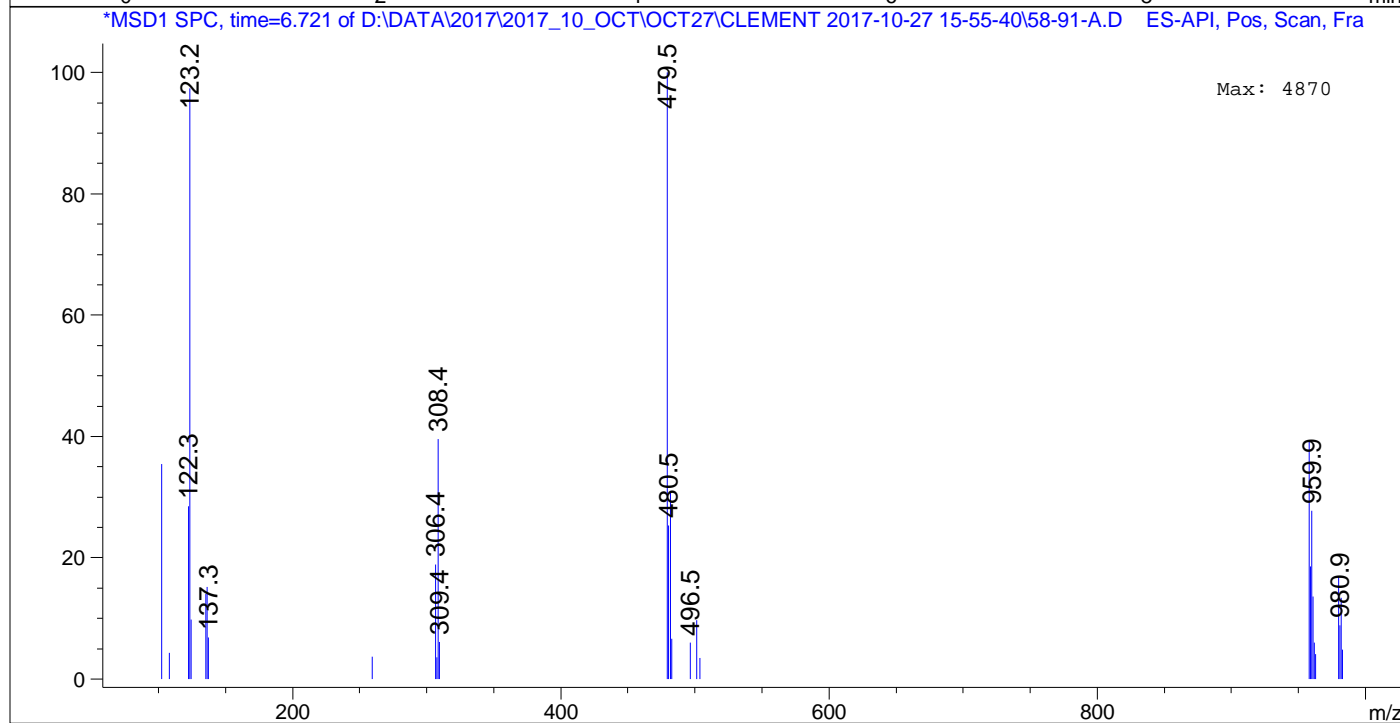

Supplement: NIHMS1921401-supplement-1.pdf [file NIHMS1921401-supplement-1.pdf]
